# Supplementary material for: Behavioral and Self-Report Cognitive Impairment Differences between Fast-Acting, Standard, and Placebo Cannabis Edibles
Source: Research Square preprint supplement (doi:10.21203/rs.3.rs-9621757/v1), 2026-05-18

**Supplementary Materials**

*Supplementary Material 1:* Extended demographics information


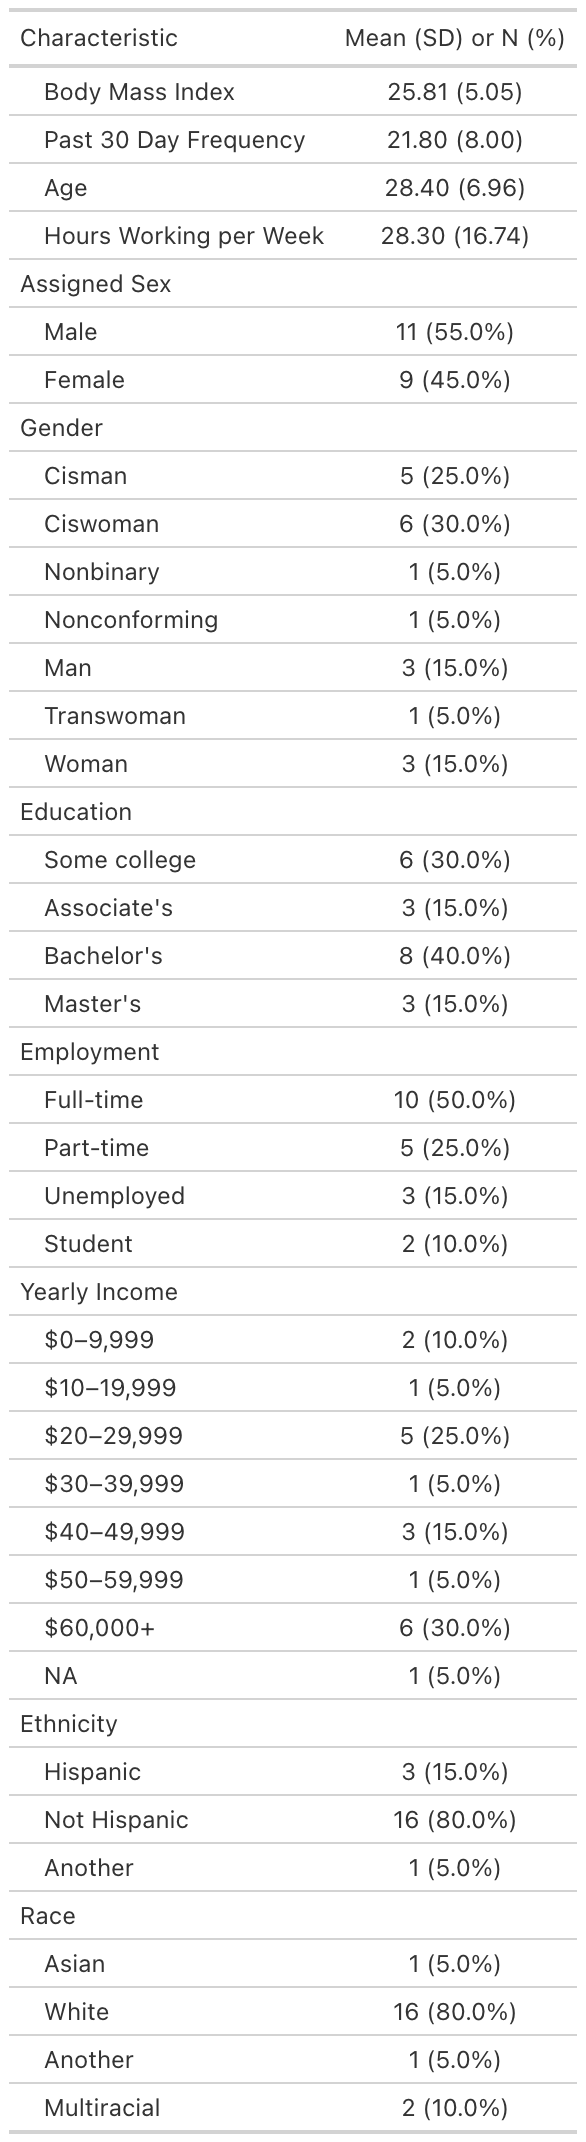


*Supplementary Table 2: Complete AMEs table, including main effects of edibles on entire model*

| *Main Effects and Pairwise Contrast Comparisons Between AMEs* | | | | | | |
| --- | --- | --- | --- | --- | --- | --- |
|  | DRUID | | | SHAS 3 | | |
|  | Main Effects | | | Main Effects | | |
| Predictor | AME | 95%CI | p | AME | 95%CI | p |
| Edible |  |  |  |  |  |  |
| Fast | 0.001306 | (-0.003, 0.006) | 0.561 | **0.00031** | **(0.000, 0.001)** | **0.0442 *** |
| Standard | -0.000767 | (-0.005, 0.004) | 0.731 | **0.000324** | **(0.000, 0.001)** | **0.0126 *** |
| Placebo | -0.001233 | (-0.006, 0.0031) | 0.572 | 0.0000365 | (0.000, 0.0001) | 0.3434 |
| Time | -0.000238 | (-0.003, 0.002) | 0.8533 | **0.000222** | **(0.000, 0.000)** | **0.0103 *** |
| **Age** | **0.2187** | **(0.021, 0.416)** | **0.0298 *** | -0.002 | (-0.019, 0.008) | 0.684 |
| BMI | -0.186 | (-0.451, 0.080) | 0.17 | -0.00796 | (-0.022, 0.006) | 0.274 |
| Past 30 Day Cannabis Use | 0.057 | (-0.110, 0.223) | 0.5 | -0.0052 | (-0.015, 0.004) | 0.286 |
| Assigned Sex ( Female - Male) | 2.17 | (-0.476, 4.830) | 0.108 | 0.042 | (-0.090, 0.174) | 0.5329 |
|  | Pairwise Differences | | | Pairwise Differences | | |
| Fast - Placebo | 0.922 | (-0.172, 2.017) | 0.0987 | **0.1009** | **(0.014, 0.188)** | **0.0224 *** |
| **Standard - Placebo** | **1.401** | **(0.307, 2.495)** | **0.0121 *** | **0.1273** | **(0.025, 0.230)** | **0.0149 *** |
| Fast - Standard | -0.479 | (-1.574, 0.616) | 0.3916 | -0.0265 | (-0.106, 0.053) | 0.5121 |
|  | SHAS 4 | | | SHAS 5 | | |
|  | Main Effects | | | Main Effects | | |
| Predictor | AME | 95%CI | p | AME | 95%CI | p |
| Edible |  |  |  |  |  |  |
| Fast | 0.000334 | (0.000, 0.001) | 0.0548 | -0.000267 | (-0.001, 0.000) | 0.249 |
| Standard | 0.000276 | (0.000, 0.001) | 0.1033 | -0.000107 | (-0.001, 0.000) | 0.664 |
| Placebo | 0.0000479 | (0.000, 0.0001) | 0.2511 | -0.000044 | (0.000, 0.0001) | 0.588 |
| Time | 0.000217 | (0.000, 0.000) | 0.0535 | -0.000137 | (0.000, 0.000) | 0.2468 |
| Age | -0.0018 | (-0.002, 0.012) | 0.7974 | -0.0073 | (-0.016, 0.001) | 0.0866 |
| BMI | -0.0235 | (-0.058, 0.011) | 0.1785 | -0.0035 | (-0.009, 0.002) | 0.2194 |
| Past 30 Day Cannabis Use | -0.015 | (-0.037, 0.008) | 0.1947 | -0.00729 | (-0.014, 0.000) | 0.0528 |
| Assigned Sex ( Female - Male) | 0.183 | (-0.072, 0.438) | 0.16 | 0.04557 | (-0.022, 0.113) | 0.1873 |
|  | Pairwise Differences | | | Pairwise Differences | | |
| Fast - Placebo | 0.143 | (-0.023, 0.308) | 0.0908 | 0.0504 | (-0.006, 0.106) | 0.0774 |
| Standard - Placebo | 0.13 | (-0.018, 0.277) | 0.0856 | **0.0691** | **(0.004, 0.135)** | **0.0388 *** |
| Fast - Standard | 0.013 | (-0.064, 0.090) | 0.7388 | -0.0187 | (-0.084, 0.046) | 0.5739 |
|  | SHAS 6 | | | SHAS 10 | | |
|  | Main Effects | | | Main Effects | | |
| Predictor | AME | 95%CI | p | AME | 95%CI | p |
| Edible |  |  |  |  |  |  |
| Fast | **0.000227** | **(0.000, 0.000)** | **0.0463 *** | **0.000742** | **(0.000, 0.001)** | **0.0153 *** |
| Standard | **0.000141** | **(0.000, 0.000)** | **0.041 *** | **0.000752** | **(0.000, 0.001)** | **0.0117 *** |
| Placebo | 0 | (0.000, 0.0000) | 0.9995 | 0.0000808 | (0.000, 0.0002) | 0.0876 |
| Time | 0.000121 | (0.000, 0.000) | **0.0232 *** | **0.000521** | **(0.000, 0.001)** | **0.00517 **** |
| Age | -0.0204 | (-0.049, 0.008) | 0.1553 | -0.0338 | (-0.078, 0.010) | 0.13276 |
| BMI | 0.000922 | (-0.009, 0.011) | 0.8518 | -0.03113 | (-0.075, 0.013) | 0.16556 |
| Past 30 Day Cannabis Use | -0.0122 | (-0.028, 0.003) | 0.1231 | -0.007125 | (-0.029, 0.015) | 0.52856 |
| Assigned Sex ( Female - Male) | 0.242 | (-0.090, 0.573) | 0.1533 | -0.012967 | (-0.314, 0.288) | 0.93267 |
|  | Pairwise Differences | | | Pairwise Differences | | |
| Fast - Placebo | 0.1403 | (-0.010, 0.291) | 0.0677 | **0.3048** | **(0.045, 0.564)** | **0.0213 *** |
| Standard - Placebo | 0.1085 | (-0.001, 0.218) | 0.053 | **0.319** | **(0.059, 0.579)** | **0.0162 *** |
| Fast - Standard | 0.0318 | (-0.061, 0.125) | 0.5022 | -0.0142 | (-0.259, 0.230) | 0.9092 |
|  | SHAS 12 | | | SHAS 13 | | |
|  | Main Effects | | | Main Effects | | |
| Predictor | AME | 95%CI | p | AME | 95%CI | p |
| Edible |  |  |  |  |  |  |
| Fast | 0.000657 | (0.000, 0.001) | 0.0649 | 0.000314 | (0.000, 0.001) | 0.0954 |
| Standard | 0.000616 | (0.000, 0.001) | 0.0638 | 0.000249 | (-0.001, 0.001) | 0.1063 |
| Placebo | 0.000205 | (0.000, 0.0005) | 0.1628 | 0.0000806 | (0.000, 0.0002) | 0.2675 |
| Time | 0.00049 | (0.000, 0.001) | 0.051 | **0.000213** | **(0.000, 0.000)** | **0.0497 *** |
| Age | -0.01666 | (-0.057, 0.024) | 0.4233 | -0.0105 | (-0.029, 0.008) | 0.2692 |
| BMI | -0.03829 | (-0.105, 0.029) | 0.2629 | 0.000643 | (-0.015, 0.016) | 0.9352 |
| Past 30 Day Cannabis Use | -0.01403 | (-0.048, 0.020) | 0.4123 | 0.000297 | (-0.010, 0.010) | 0.9546 |
| Assigned Sex ( Female - Male) | 0.13131 | (-0.314, 0.576) | 0.5631 | 0.0938 | (-0.097, 0.285) | 0.3356 |
|  | Pairwise Differences | | | Pairwise Differences | | |
| Fast - Placebo | 0.2175 | (-0.047, 0.482) | 0.1067 | 0.11613 | (-0.022, 0.254) | 0.099 |
| Standard - Placebo | 0.2299 | (-0.042, 0.502) | 0.0978 | 0.11823 | (-0.017, -0.254) | 0.0874 |
| Fast - Standard | -0.0124 | (-0.211, 0.186) | 0.9027 | -0.00211 | (-0.140, 0.136) | 0.9761 |

*Supplementary Material 3: Individual Pairwise comparison tables*

*DRUID*


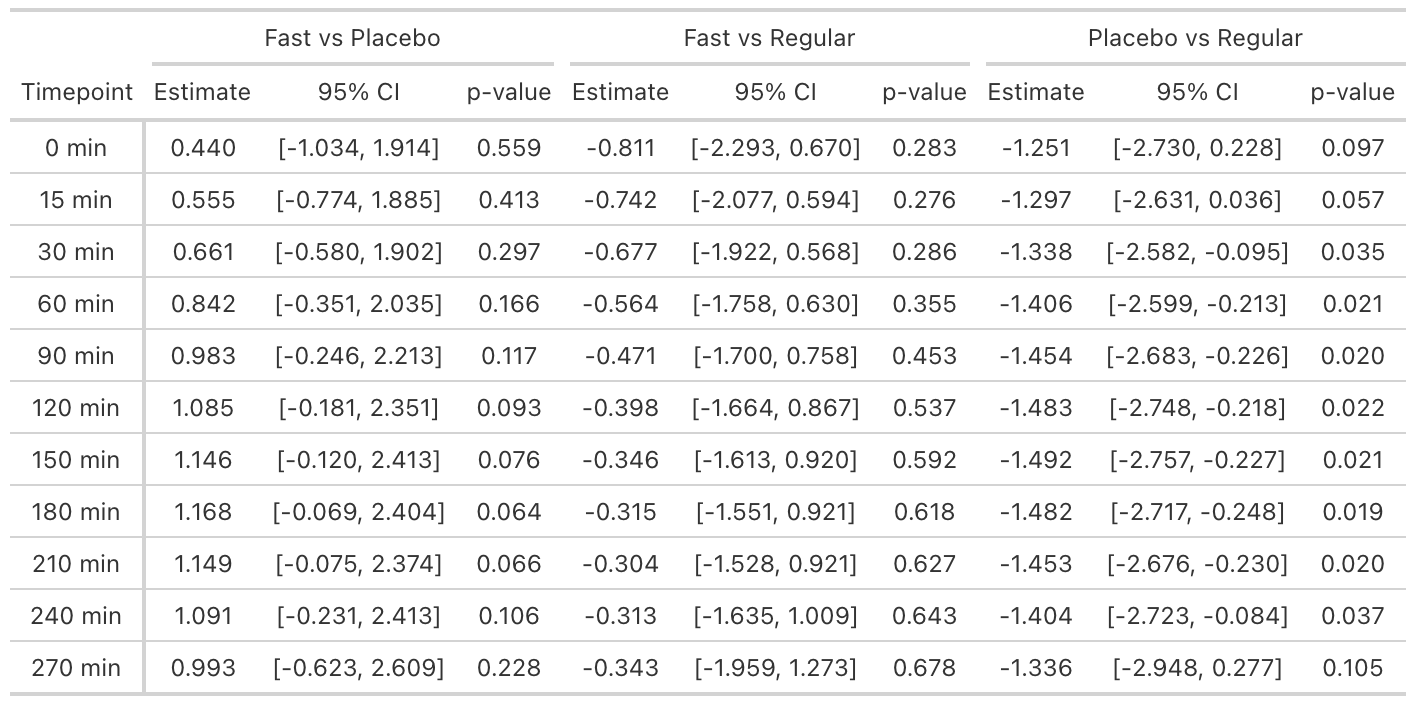


*SHAS 3 “Clumsiness”*


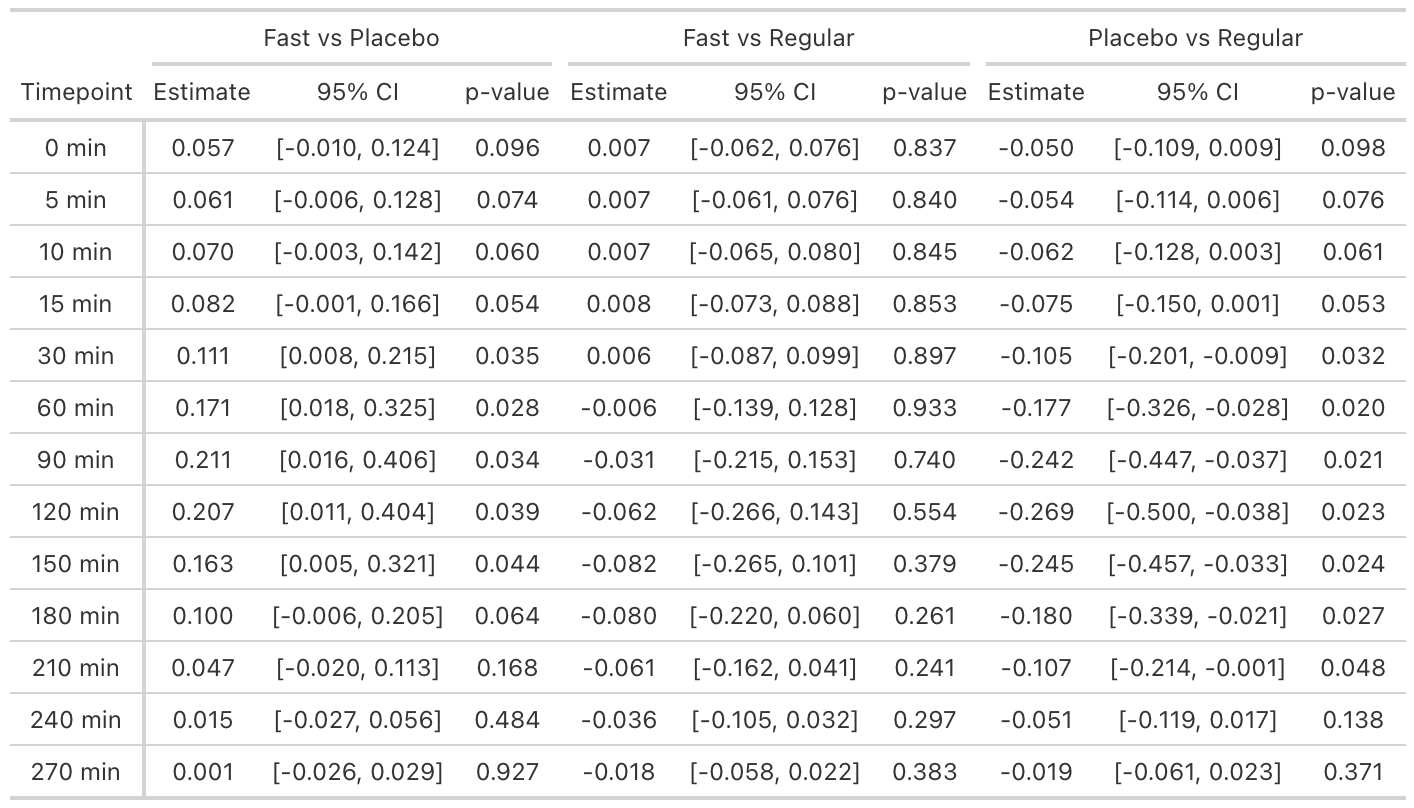


*SHAS 4 “Confusion”*


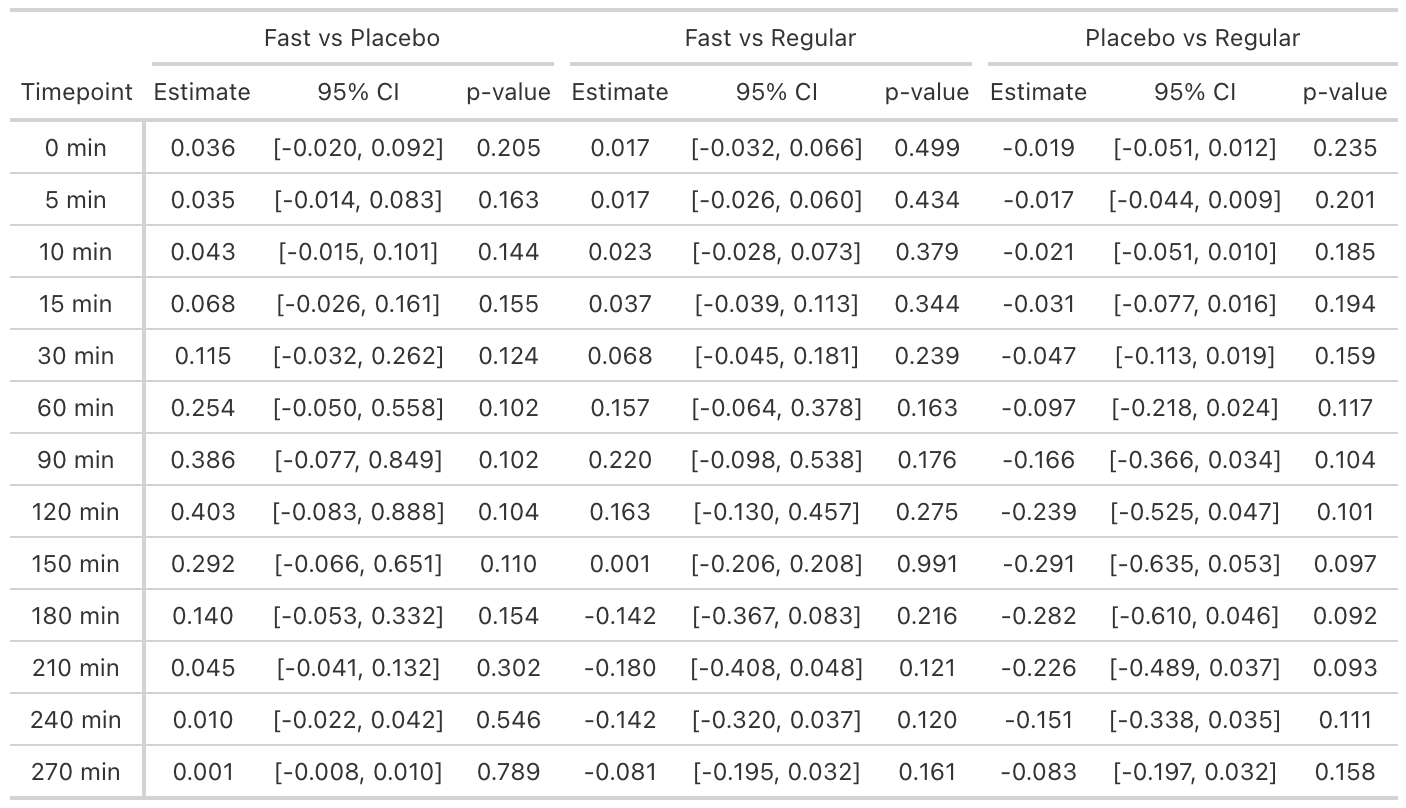


*SHAS 5 “Slurring of Speech”*


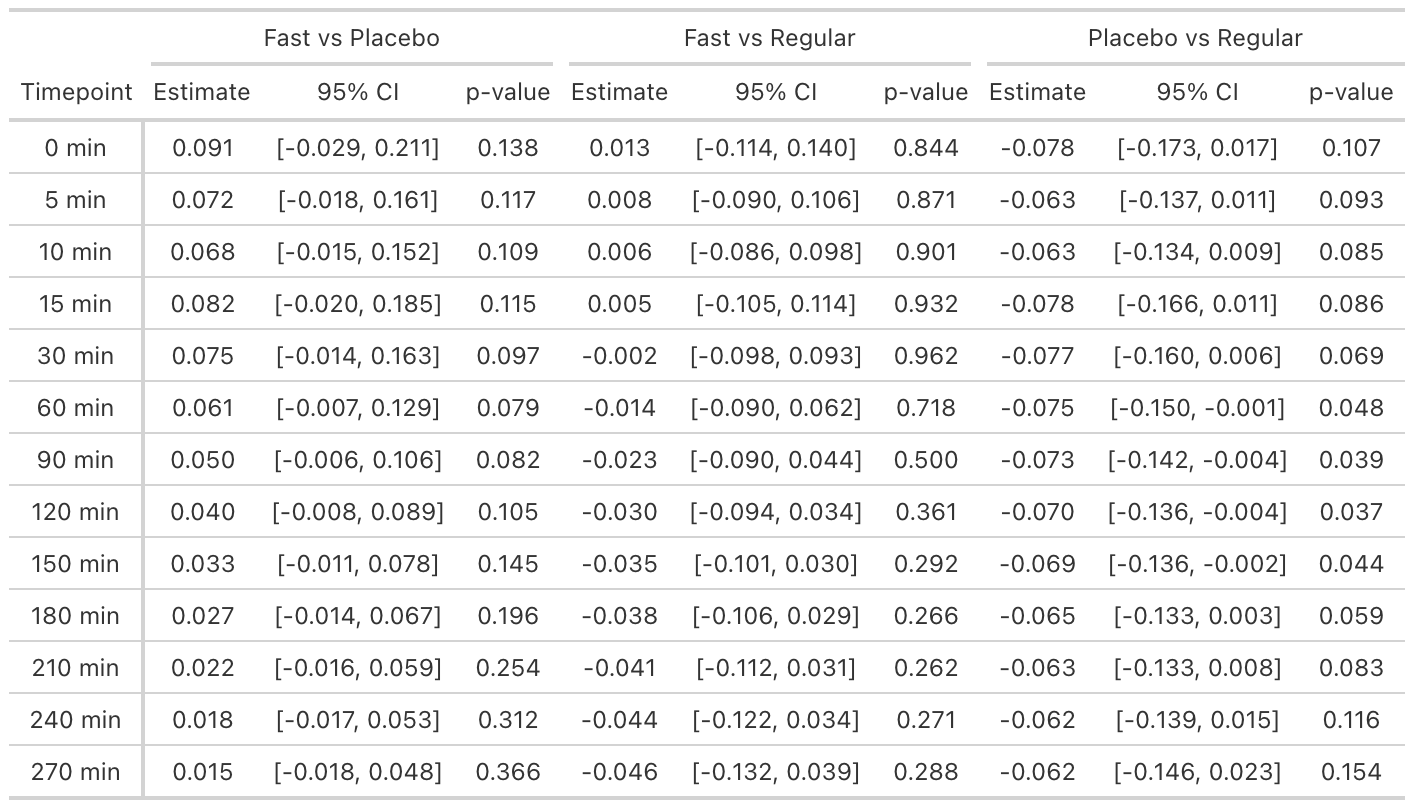


*SHAS 6 “Dizziness”*


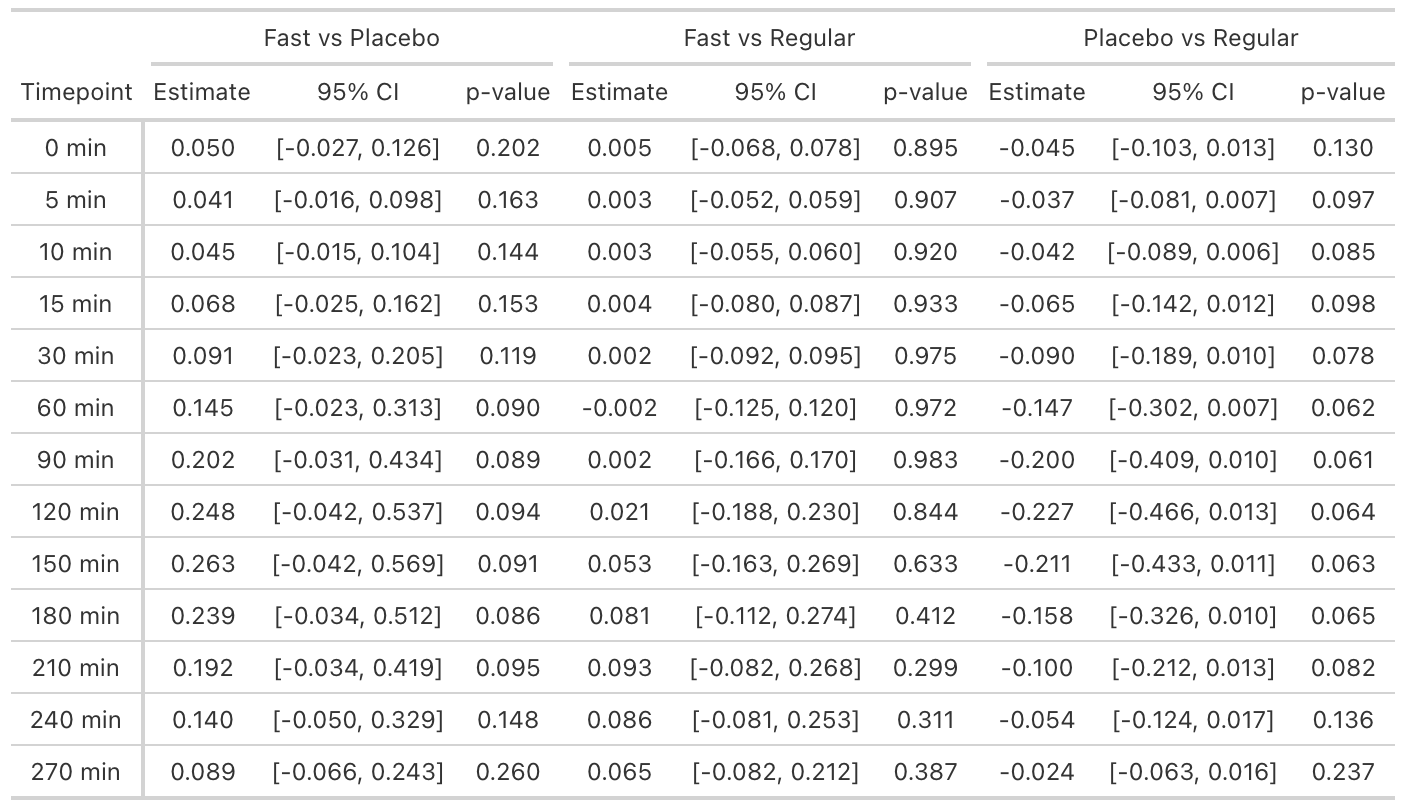


*SHAS 10 “Distortion of Time”*


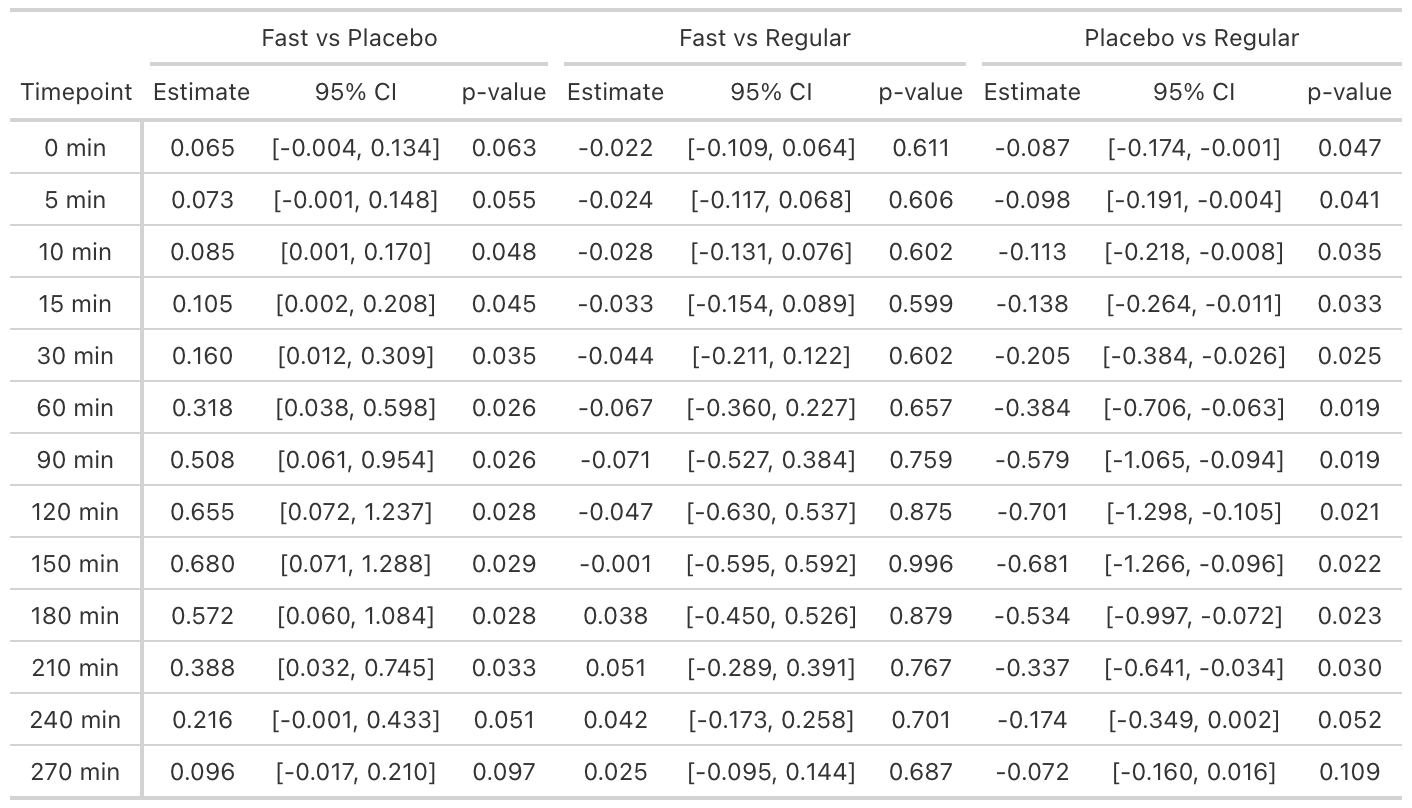


*SHAS 12 “Difficulty Concentrating”*


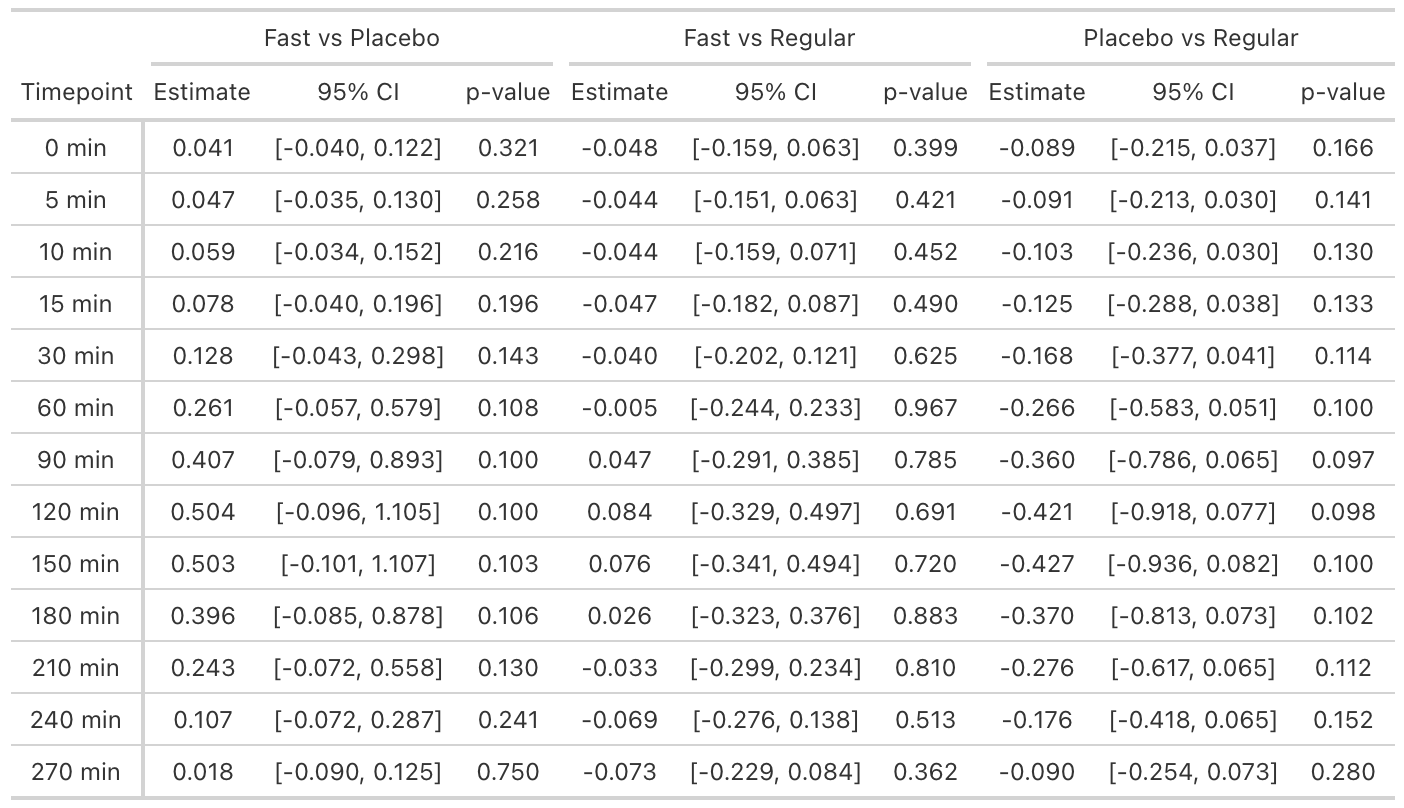


*SHAS 13 “Feelings of Floating”*


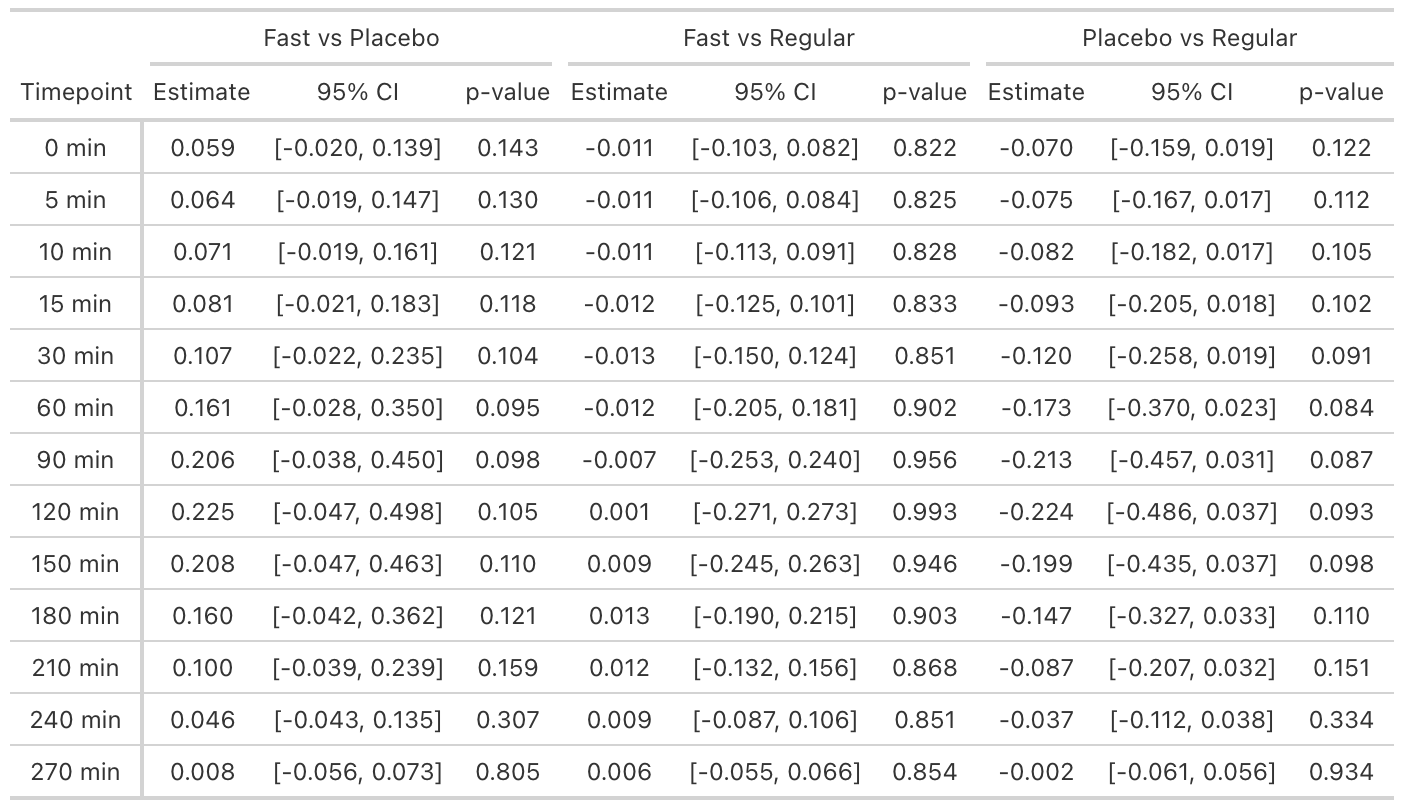

Supplement: Supplementary file 2 [file 31aaeeb5194983c9f0c4214f.docx]
