# Supplementary material for: Behavioral and Self-Report Cognitive Impairment Differences between Fast-Acting, Standard, and Placebo Cannabis Edibles
Source: Research Square preprint supplement (doi:10.21203/rs.3.rs-9621757/v1), 2026-05-18
Supplement: Supplementary file 1 [file 1823c6f30e8daebc9e61bdb7.pdf]

- a. Wilcoxon Signed Ranks Test
- b. Based on negative ranks.
- c. Based on positive ranks.

## NPar Tests

### Notes

|                        |                                |                                                                                                        |
|------------------------|--------------------------------|--------------------------------------------------------------------------------------------------------|
| Output Created         |                                | 05-MAR-2025 21:25:35                                                                                   |
| Comments               |                                |                                                                                                        |
| Input                  | Data                           | /Users/dicec004/My Drive/WANA stuff/WANA Merged Data.sav                                               |
|                        | Active Dataset                 | DataSet1                                                                                               |
|                        | Filter                         | <none>                                                                                                 |
|                        | Weight                         | <none>                                                                                                 |
|                        | Split File                     | <none>                                                                                                 |
|                        | N of Rows in Working Data File | 20                                                                                                     |
| Missing Value Handling | Definition of Missing          | User-defined missing values are treated as missing.                                                    |
|                        | Cases Used                     | Statistics for each test are based on all cases with valid data for the variable(s) used in that test. |

## Notes

|           |                                                                                                                                                                                                                                                                                                                                                                                                                                                                                                                                                                                                                                                                                                                                                                                                                                           |             |
|-----------|-------------------------------------------------------------------------------------------------------------------------------------------------------------------------------------------------------------------------------------------------------------------------------------------------------------------------------------------------------------------------------------------------------------------------------------------------------------------------------------------------------------------------------------------------------------------------------------------------------------------------------------------------------------------------------------------------------------------------------------------------------------------------------------------------------------------------------------------|-------------|
| Syntax    | <pre> NPAR TESTS /WILCOXON=T0DRUID. A T3DRUID.A T4DRUID.A T5DRUID.A T6DRUID.A T7DRUID.A T8DRUID.A T9DRUID.A T10DRUID.A   T11DRUID.A T12DRUID.A   T0DRUID.B T3DRUID. B T4DRUID.B T5DRUID.B T6DRUID.B T7DRUID.B T8DRUID.B T9DRUID.B T10DRUID.B   T11DRUID.B T12DRUID.B   T0DRUID.C T3DRUID. C T4DRUID.C T5DRUID.C T6DRUID.C T7DRUID.C T8DRUID.C T9DRUID.C T10DRUID.C   T11DRUID.C T12DRUID.C   WITH   T0DRUID.B T3DRUID. B T4DRUID.B T5DRUID.B T6DRUID.B T7DRUID.B T8DRUID.B T9DRUID.B T10DRUID.B   T11DRUID.B T12DRUID.B   T0DRUID.C T3DRUID. C T4DRUID.C T5DRUID.C T6DRUID.C T7DRUID.C T8DRUID.C T9DRUID.C T10DRUID.C   T11DRUID.C T12DRUID.C   T0DRUID.A T3DRUID. A T4DRUID.A T5DRUID.A T6DRUID.A T7DRUID.A T8DRUID.A T9DRUID.A T10DRUID.A   T11DRUID.A T12DRUID.A (PAIRED) /STATISTICS DESCRIPTIVES /MISSING ANALYSIS.           </pre> |             |
| Resources | Processor Time                                                                                                                                                                                                                                                                                                                                                                                                                                                                                                                                                                                                                                                                                                                                                                                                                            | 00:00:00.05 |
|           | Elapsed Time                                                                                                                                                                                                                                                                                                                                                                                                                                                                                                                                                                                                                                                                                                                                                                                                                              | 00:00:00.00 |
|           | Number of Cases Allowed <sup>a</sup>                                                                                                                                                                                                                                                                                                                                                                                                                                                                                                                                                                                                                                                                                                                                                                                                      | 82782       |

a. Based on availability of workspace memory.

### Descriptive Statistics

|            | N  | Mean   | Std. Deviation | Minimum | Maximum |
|------------|----|--------|----------------|---------|---------|
| T0DRUID.A  | 20 | 41.580 | 3.1267         | 36.0    | 49.1    |
| T3DRUID.A  | 17 | 43.206 | 3.6590         | 37.7    | 50.4    |
| T4DRUID.A  | 19 | 42.895 | 4.3155         | 37.8    | 51.5    |
| T5DRUID.A  | 20 | 43.225 | 5.2318         | 36.9    | 54.8    |
| T6DRUID.A  | 20 | 43.890 | 5.7303         | 36.4    | 55.8    |
| T7DRUID.A  | 20 | 42.640 | 4.1279         | 37.1    | 52.1    |
| T8DRUID.A  | 20 | 43.615 | 5.1506         | 36.6    | 58.9    |
| T9DRUID.A  | 20 | 42.225 | 3.2465         | 37.6    | 51.8    |
| T10DRUID.A | 20 | 42.600 | 4.6202         | 37.7    | 54.8    |
| T11DRUID.A | 20 | 41.875 | 4.1291         | 36.3    | 53.2    |
| T12DRUID.A | 19 | 43.332 | 5.8014         | 37.1    | 56.7    |
| T0DRUID.B  | 20 | 41.445 | 4.4250         | 35.3    | 52.3    |
| T3DRUID.B  | 19 | 40.900 | 5.1397         | 30.4    | 51.4    |
| T4DRUID.B  | 20 | 42.085 | 3.9159         | 36.2    | 49.7    |
| T5DRUID.B  | 20 | 42.375 | 5.0280         | 35.9    | 54.0    |
| T6DRUID.B  | 20 | 41.055 | 5.0772         | 35.1    | 58.2    |
| T7DRUID.B  | 20 | 42.415 | 5.6354         | 36.4    | 56.6    |
| T8DRUID.B  | 20 | 40.805 | 3.9331         | 34.8    | 50.4    |
| T9DRUID.B  | 20 | 41.420 | 4.2231         | 35.5    | 51.6    |
| T10DRUID.B | 20 | 41.700 | 3.4073         | 36.2    | 48.0    |
| T11DRUID.B | 20 | 40.965 | 4.1949         | 36.1    | 54.5    |
| T12DRUID.B | 19 | 41.332 | 5.1035         | 33.4    | 55.2    |
| T0DRUID.C  | 20 | 40.475 | 2.5657         | 34.7    | 44.6    |
| T3DRUID.C  | 18 | 43.122 | 5.3266         | 34.8    | 56.1    |
| T4DRUID.C  | 20 | 43.305 | 5.0970         | 36.4    | 57.6    |
| T5DRUID.C  | 19 | 42.616 | 5.2166         | 36.9    | 59.5    |
| T6DRUID.C  | 20 | 42.130 | 3.9654         | 36.5    | 49.4    |
| T7DRUID.C  | 20 | 42.195 | 3.3565         | 36.6    | 49.5    |
| T8DRUID.C  | 20 | 42.985 | 3.9048         | 38.5    | 54.4    |
| T9DRUID.C  | 19 | 42.716 | 5.0754         | 36.6    | 60.4    |
| T10DRUID.C | 20 | 42.420 | 5.0137         | 36.9    | 55.0    |
| T11DRUID.C | 19 | 42.542 | 4.3936         | 36.5    | 51.1    |
| T12DRUID.C | 19 | 41.953 | 4.3205         | 35.2    | 54.1    |

### Wilcoxon Signed Ranks Test

### Ranks

|                             |                | N                | Mean Rank | Sum of Ranks |
|-----------------------------|----------------|------------------|-----------|--------------|
| T0DRUID.B - T0DRUID.A       | Negative Ranks | 10 <sup>a</sup>  | 11.45     | 114.50       |
|                             | Positive Ranks | 10 <sup>b</sup>  | 9.55      | 95.50        |
|                             | Ties           | 0 <sup>c</sup>   |           |              |
|                             | Total          | 20               |           |              |
| T3DRUID.B - T3DRUID.A       | Negative Ranks | 11 <sup>d</sup>  | 10.50     | 115.50       |
|                             | Positive Ranks | 5 <sup>e</sup>   | 4.10      | 20.50        |
|                             | Ties           | 0 <sup>f</sup>   |           |              |
|                             | Total          | 16               |           |              |
| T4DRUID.B - T4DRUID.A       | Negative Ranks | 12 <sup>g</sup>  | 10.67     | 128.00       |
|                             | Positive Ranks | 7 <sup>h</sup>   | 8.86      | 62.00        |
|                             | Ties           | 0 <sup>i</sup>   |           |              |
|                             | Total          | 19               |           |              |
| T5DRUID.B - T5DRUID.A       | Negative Ranks | 13 <sup>j</sup>  | 10.69     | 139.00       |
|                             | Positive Ranks | 7 <sup>k</sup>   | 10.14     | 71.00        |
|                             | Ties           | 0 <sup>l</sup>   |           |              |
|                             | Total          | 20               |           |              |
| T6DRUID.B - T6DRUID.A       | Negative Ranks | 15 <sup>m</sup>  | 11.63     | 174.50       |
|                             | Positive Ranks | 5 <sup>n</sup>   | 7.10      | 35.50        |
|                             | Ties           | 0 <sup>o</sup>   |           |              |
|                             | Total          | 20               |           |              |
| T7DRUID.B - T7DRUID.A       | Negative Ranks | 9 <sup>p</sup>   | 12.00     | 108.00       |
|                             | Positive Ranks | 10 <sup>q</sup>  | 8.20      | 82.00        |
|                             | Ties           | 1 <sup>r</sup>   |           |              |
|                             | Total          | 20               |           |              |
| T8DRUID.B - T8DRUID.A       | Negative Ranks | 14 <sup>s</sup>  | 12.61     | 176.50       |
|                             | Positive Ranks | 6 <sup>t</sup>   | 5.58      | 33.50        |
|                             | Ties           | 0 <sup>u</sup>   |           |              |
|                             | Total          | 20               |           |              |
| T9DRUID.B - T9DRUID.A       | Negative Ranks | 12 <sup>v</sup>  | 11.08     | 133.00       |
|                             | Positive Ranks | 8 <sup>w</sup>   | 9.63      | 77.00        |
|                             | Ties           | 0 <sup>x</sup>   |           |              |
|                             | Total          | 20               |           |              |
| T10DRUID.B - T10DRUID.<br>A | Negative Ranks | 12 <sup>y</sup>  | 11.75     | 141.00       |
|                             | Positive Ranks | 8 <sup>z</sup>   | 8.63      | 69.00        |
|                             | Ties           | 0 <sup>aa</sup>  |           |              |
|                             | Total          | 20               |           |              |
| T11DRUID.B - T11DRUID.<br>A | Negative Ranks | 13 <sup>ab</sup> | 10.54     | 137.00       |
|                             | Positive Ranks | 6 <sup>ac</sup>  | 8.83      | 53.00        |

### Ranks

|                         |                | N                | Mean Rank | Sum of Ranks |
|-------------------------|----------------|------------------|-----------|--------------|
|                         | Ties           | 1 <sup>ad</sup>  |           |              |
|                         | Total          | 20               |           |              |
| T12DRUID.B - T12DRUID.A | Negative Ranks | 12 <sup>ae</sup> | 10.71     | 128.50       |
|                         | Positive Ranks | 6 <sup>af</sup>  | 7.08      | 42.50        |
|                         | Ties           | 0 <sup>ag</sup>  |           |              |
|                         | Total          | 18               |           |              |
| T0DRUID.C - T0DRUID.B   | Negative Ranks | 11 <sup>ah</sup> | 11.45     | 126.00       |
|                         | Positive Ranks | 9 <sup>ai</sup>  | 9.33      | 84.00        |
|                         | Ties           | 0 <sup>aj</sup>  |           |              |
|                         | Total          | 20               |           |              |
| T3DRUID.C - T3DRUID.B   | Negative Ranks | 6 <sup>ak</sup>  | 7.50      | 45.00        |
|                         | Positive Ranks | 12 <sup>al</sup> | 10.50     | 126.00       |
|                         | Ties           | 0 <sup>am</sup>  |           |              |
|                         | Total          | 18               |           |              |
| T4DRUID.C - T4DRUID.B   | Negative Ranks | 11 <sup>an</sup> | 7.73      | 85.00        |
|                         | Positive Ranks | 9 <sup>ao</sup>  | 13.89     | 125.00       |
|                         | Ties           | 0 <sup>ap</sup>  |           |              |
|                         | Total          | 20               |           |              |
| T5DRUID.C - T5DRUID.B   | Negative Ranks | 7 <sup>aq</sup>  | 10.21     | 71.50        |
|                         | Positive Ranks | 12 <sup>ar</sup> | 9.88      | 118.50       |
|                         | Ties           | 0 <sup>as</sup>  |           |              |
|                         | Total          | 19               |           |              |
| T6DRUID.C - T6DRUID.B   | Negative Ranks | 5 <sup>at</sup>  | 12.80     | 64.00        |
|                         | Positive Ranks | 15 <sup>au</sup> | 9.73      | 146.00       |
|                         | Ties           | 0 <sup>av</sup>  |           |              |
|                         | Total          | 20               |           |              |
| T7DRUID.C - T7DRUID.B   | Negative Ranks | 8 <sup>aw</sup>  | 11.88     | 95.00        |
|                         | Positive Ranks | 12 <sup>ax</sup> | 9.58      | 115.00       |
|                         | Ties           | 0 <sup>ay</sup>  |           |              |
|                         | Total          | 20               |           |              |
| T8DRUID.C - T8DRUID.B   | Negative Ranks | 5 <sup>az</sup>  | 6.70      | 33.50        |
|                         | Positive Ranks | 15 <sup>ba</sup> | 11.77     | 176.50       |
|                         | Ties           | 0 <sup>bb</sup>  |           |              |
|                         | Total          | 20               |           |              |
| T9DRUID.C - T9DRUID.B   | Negative Ranks | 5 <sup>bc</sup>  | 9.00      | 45.00        |
|                         | Positive Ranks | 14 <sup>bd</sup> | 10.36     | 145.00       |
|                         | Ties           | 0 <sup>be</sup>  |           |              |
|                         | Total          | 19               |           |              |

### Ranks

|                             |                | N                | Mean Rank | Sum of Ranks |
|-----------------------------|----------------|------------------|-----------|--------------|
| T10DRUID.C - T10DRUID.<br>B | Negative Ranks | 9 <sup>bf</sup>  | 9.61      | 86.50        |
|                             | Positive Ranks | 11 <sup>bg</sup> | 11.23     | 123.50       |
|                             | Ties           | 0 <sup>bh</sup>  |           |              |
|                             | Total          | 20               |           |              |
| T11DRUID.C - T11DRUID.<br>B | Negative Ranks | 5 <sup>bi</sup>  | 7.40      | 37.00        |
|                             | Positive Ranks | 14 <sup>bj</sup> | 10.93     | 153.00       |
|                             | Ties           | 0 <sup>bk</sup>  |           |              |
|                             | Total          | 19               |           |              |
| T12DRUID.C - T12DRUID.<br>B | Negative Ranks | 4 <sup>bl</sup>  | 10.25     | 41.00        |
|                             | Positive Ranks | 14 <sup>bm</sup> | 9.29      | 130.00       |
|                             | Ties           | 0 <sup>bn</sup>  |           |              |
|                             | Total          | 18               |           |              |
| T0DRUID.A - T0DRUID.C       | Negative Ranks | 8 <sup>bo</sup>  | 6.38      | 51.00        |
|                             | Positive Ranks | 10 <sup>bp</sup> | 12.00     | 120.00       |
|                             | Ties           | 2 <sup>bq</sup>  |           |              |
|                             | Total          | 20               |           |              |
| T3DRUID.A - T3DRUID.C       | Negative Ranks | 5 <sup>br</sup>  | 8.60      | 43.00        |
|                             | Positive Ranks | 10 <sup>bs</sup> | 7.70      | 77.00        |
|                             | Ties           | 0 <sup>bt</sup>  |           |              |
|                             | Total          | 15               |           |              |
| T4DRUID.A - T4DRUID.C       | Negative Ranks | 8 <sup>bu</sup>  | 9.75      | 78.00        |
|                             | Positive Ranks | 10 <sup>bv</sup> | 9.30      | 93.00        |
|                             | Ties           | 1 <sup>bw</sup>  |           |              |
|                             | Total          | 19               |           |              |
| T5DRUID.A - T5DRUID.C       | Negative Ranks | 8 <sup>bx</sup>  | 10.06     | 80.50        |
|                             | Positive Ranks | 9 <sup>by</sup>  | 8.06      | 72.50        |
|                             | Ties           | 2 <sup>bz</sup>  |           |              |
|                             | Total          | 19               |           |              |
| T6DRUID.A - T6DRUID.C       | Negative Ranks | 9 <sup>ca</sup>  | 8.83      | 79.50        |
|                             | Positive Ranks | 11 <sup>cb</sup> | 11.86     | 130.50       |
|                             | Ties           | 0 <sup>cc</sup>  |           |              |
|                             | Total          | 20               |           |              |
| T7DRUID.A - T7DRUID.C       | Negative Ranks | 8 <sup>cd</sup>  | 11.31     | 90.50        |
|                             | Positive Ranks | 12 <sup>ce</sup> | 9.96      | 119.50       |
|                             | Ties           | 0 <sup>cf</sup>  |           |              |
|                             | Total          | 20               |           |              |
| T8DRUID.A - T8DRUID.C       | Negative Ranks | 7 <sup>cg</sup>  | 11.29     | 79.00        |
|                             | Positive Ranks | 13 <sup>ch</sup> | 10.08     | 131.00       |

### Ranks

|                         |                | N                | Mean Rank | Sum of Ranks |
|-------------------------|----------------|------------------|-----------|--------------|
|                         | Ties           | 0 <sup>ci</sup>  |           |              |
|                         | Total          | 20               |           |              |
| T9DRUID.A - T9DRUID.C   | Negative Ranks | 9 <sup>cj</sup>  | 10.89     | 98.00        |
|                         | Positive Ranks | 10 <sup>ck</sup> | 9.20      | 92.00        |
|                         | Ties           | 0 <sup>cl</sup>  |           |              |
|                         | Total          | 19               |           |              |
|                         |                |                  |           |              |
| T10DRUID.A - T10DRUID.C | Negative Ranks | 9 <sup>cm</sup>  | 11.39     | 102.50       |
|                         | Positive Ranks | 11 <sup>cn</sup> | 9.77      | 107.50       |
|                         | Ties           | 0 <sup>co</sup>  |           |              |
|                         | Total          | 20               |           |              |
| T11DRUID.A - T11DRUID.C | Negative Ranks | 13 <sup>cp</sup> | 8.35      | 108.50       |
|                         | Positive Ranks | 4 <sup>cq</sup>  | 11.13     | 44.50        |
|                         | Ties           | 2 <sup>cr</sup>  |           |              |
|                         | Total          | 19               |           |              |
| T12DRUID.A - T12DRUID.C | Negative Ranks | 8 <sup>cs</sup>  | 9.25      | 74.00        |
|                         | Positive Ranks | 10 <sup>ct</sup> | 9.70      | 97.00        |
|                         | Ties           | 0 <sup>cu</sup>  |           |              |
|                         | Total          | 18               |           |              |

- a. T0DRUID.B < T0DRUID.A
- b. T0DRUID.B > T0DRUID.A
- c. T0DRUID.B = T0DRUID.A
- d. T3DRUID.B < T3DRUID.A
- e. T3DRUID.B > T3DRUID.A
- f. T3DRUID.B = T3DRUID.A
- g. T4DRUID.B < T4DRUID.A
- h. T4DRUID.B > T4DRUID.A
- i. T4DRUID.B = T4DRUID.A
- j. T5DRUID.B < T5DRUID.A
- k. T5DRUID.B > T5DRUID.A
- l. T5DRUID.B = T5DRUID.A
- m. T6DRUID.B < T6DRUID.A
- n. T6DRUID.B > T6DRUID.A
- o. T6DRUID.B = T6DRUID.A
- p. T7DRUID.B < T7DRUID.A
- q. T7DRUID.B > T7DRUID.A
- r. T7DRUID.B = T7DRUID.A
- s. T8DRUID.B < T8DRUID.A
- t. T8DRUID.B > T8DRUID.A
- u. T8DRUID.B = T8DRUID.A
- v. T9DRUID.B < T9DRUID.A
- w. T9DRUID.B > T9DRUID.A
- x. T9DRUID.B = T9DRUID.A

w.  $T9DRUID.B > T9DRUID.A$   
x.  $T9DRUID.B = T9DRUID.A$   
y.  $T10DRUID.B < T10DRUID.A$   
z.  $T10DRUID.B > T10DRUID.A$   
aa.  $T10DRUID.B = T10DRUID.A$   
ab.  $T11DRUID.B < T11DRUID.A$   
ac.  $T11DRUID.B > T11DRUID.A$   
ad.  $T11DRUID.B = T11DRUID.A$   
ae.  $T12DRUID.B < T12DRUID.A$   
af.  $T12DRUID.B > T12DRUID.A$   
ag.  $T12DRUID.B = T12DRUID.A$   
ah.  $T0DRUID.C < T0DRUID.B$   
ai.  $T0DRUID.C > T0DRUID.B$   
aj.  $T0DRUID.C = T0DRUID.B$   
ak.  $T3DRUID.C < T3DRUID.B$   
al.  $T3DRUID.C > T3DRUID.B$   
am.  $T3DRUID.C = T3DRUID.B$   
an.  $T4DRUID.C < T4DRUID.B$   
ao.  $T4DRUID.C > T4DRUID.B$   
ap.  $T4DRUID.C = T4DRUID.B$   
aq.  $T5DRUID.C < T5DRUID.B$   
ar.  $T5DRUID.C > T5DRUID.B$   
as.  $T5DRUID.C = T5DRUID.B$   
at.  $T6DRUID.C < T6DRUID.B$   
au.  $T6DRUID.C > T6DRUID.B$   
av.  $T6DRUID.C = T6DRUID.B$   
aw.  $T7DRUID.C < T7DRUID.B$   
ax.  $T7DRUID.C > T7DRUID.B$   
ay.  $T7DRUID.C = T7DRUID.B$   
az.  $T8DRUID.C < T8DRUID.B$   
ba.  $T8DRUID.C > T8DRUID.B$   
bb.  $T8DRUID.C = T8DRUID.B$   
bc.  $T9DRUID.C < T9DRUID.B$   
bd.  $T9DRUID.C > T9DRUID.B$   
be.  $T9DRUID.C = T9DRUID.B$   
bf.  $T10DRUID.C < T10DRUID.B$   
bg.  $T10DRUID.C > T10DRUID.B$   
bh.  $T10DRUID.C = T10DRUID.B$   
bi.  $T11DRUID.C < T11DRUID.B$   
bj.  $T11DRUID.C > T11DRUID.B$   
bk.  $T11DRUID.C = T11DRUID.B$   
bl.  $T12DRUID.C < T12DRUID.B$   
bm.  $T12DRUID.C > T12DRUID.B$   
bn.  $T12DRUID.C = T12DRUID.B$   
bo.  $T0DRUID.A < T0DRUID.C$

- bo. T0DRUID.A < T0DRUID.C
- bp. T0DRUID.A > T0DRUID.C
- bq. T0DRUID.A = T0DRUID.C
- br. T3DRUID.A < T3DRUID.C
- bs. T3DRUID.A > T3DRUID.C
- bt. T3DRUID.A = T3DRUID.C
- bu. T4DRUID.A < T4DRUID.C
- bv. T4DRUID.A > T4DRUID.C
- bw. T4DRUID.A = T4DRUID.C
- bx. T5DRUID.A < T5DRUID.C
- by. T5DRUID.A > T5DRUID.C
- bz. T5DRUID.A = T5DRUID.C
- ca. T6DRUID.A < T6DRUID.C
- cb. T6DRUID.A > T6DRUID.C
- cc. T6DRUID.A = T6DRUID.C
- cd. T7DRUID.A < T7DRUID.C
- ce. T7DRUID.A > T7DRUID.C
- cf. T7DRUID.A = T7DRUID.C
- cg. T8DRUID.A < T8DRUID.C
- ch. T8DRUID.A > T8DRUID.C
- ci. T8DRUID.A = T8DRUID.C
- cj. T9DRUID.A < T9DRUID.C
- ck. T9DRUID.A > T9DRUID.C
- cl. T9DRUID.A = T9DRUID.C
- cm. T10DRUID.A < T10DRUID.C
- cn. T10DRUID.A > T10DRUID.C
- co. T10DRUID.A = T10DRUID.C
- cp. T11DRUID.A < T11DRUID.C
- cq. T11DRUID.A > T11DRUID.C
- cr. T11DRUID.A = T11DRUID.C
- cs. T12DRUID.A < T12DRUID.C
- ct. T12DRUID.A > T12DRUID.C
- cu. T12DRUID.A = T12DRUID.C

**Test Statistics<sup>a</sup>**

|                        | T0DRUID.B -<br>T0DRUID.A | T3DRUID.B -<br>T3DRUID.A | T4DRUID.B -<br>T4DRUID.A | T5DRUID.B -<br>T5DRUID.A |
|------------------------|--------------------------|--------------------------|--------------------------|--------------------------|
| Z                      | -.355 <sup>b</sup>       | -2.457 <sup>b</sup>      | -1.328 <sup>b</sup>      | -1.270 <sup>b</sup>      |
| Asymp. Sig. (2-tailed) | .723                     | .014                     | .184                     | .204                     |

| Test Statistics <sup>a</sup> |                       |                       |                       |                       |
|------------------------------|-----------------------|-----------------------|-----------------------|-----------------------|
|                              | T6DRUID.B - T6DRUID.A | T7DRUID.B - T7DRUID.A | T8DRUID.B - T8DRUID.A | T9DRUID.B - T9DRUID.A |
| Z                            | -2.595 <sup>b</sup>   | -.523 <sup>b</sup>    | -2.670 <sup>b</sup>   | -1.046 <sup>b</sup>   |
| Asymp. Sig. (2-tailed)       | .009                  | .601                  | .008                  | .296                  |

| Test Statistics <sup>a</sup> |                         |                         |                         |                       |
|------------------------------|-------------------------|-------------------------|-------------------------|-----------------------|
|                              | T10DRUID.B - T10DRUID.A | T11DRUID.B - T11DRUID.A | T12DRUID.B - T12DRUID.A | T0DRUID.C - T0DRUID.B |
| Z                            | -1.344 <sup>b</sup>     | -1.691 <sup>b</sup>     | -1.873 <sup>b</sup>     | -.784 <sup>b</sup>    |
| Asymp. Sig. (2-tailed)       | .179                    | .091                    | .061                    | .433                  |

| Test Statistics <sup>a</sup> |                       |                       |                       |                       |
|------------------------------|-----------------------|-----------------------|-----------------------|-----------------------|
|                              | T3DRUID.C - T3DRUID.B | T4DRUID.C - T4DRUID.B | T5DRUID.C - T5DRUID.B | T6DRUID.C - T6DRUID.B |
| Z                            | -1.764 <sup>c</sup>   | -.747 <sup>c</sup>    | -.946 <sup>c</sup>    | -1.531 <sup>c</sup>   |
| Asymp. Sig. (2-tailed)       | .078                  | .455                  | .344                  | .126                  |

| Test Statistics <sup>a</sup> |                       |                       |                       |                         |
|------------------------------|-----------------------|-----------------------|-----------------------|-------------------------|
|                              | T7DRUID.C - T7DRUID.B | T8DRUID.C - T8DRUID.B | T9DRUID.C - T9DRUID.B | T10DRUID.C - T10DRUID.B |
| Z                            | -.373 <sup>c</sup>    | -2.670 <sup>c</sup>   | -2.013 <sup>c</sup>   | -.691 <sup>c</sup>      |
| Asymp. Sig. (2-tailed)       | .709                  | .008                  | .044                  | .490                    |

| Test Statistics <sup>a</sup> |                         |                         |                       |                       |
|------------------------------|-------------------------|-------------------------|-----------------------|-----------------------|
|                              | T11DRUID.C - T11DRUID.B | T12DRUID.C - T12DRUID.B | T0DRUID.A - T0DRUID.C | T3DRUID.A - T3DRUID.C |
| Z                            | -2.335 <sup>c</sup>     | -1.939 <sup>c</sup>     | -1.503 <sup>c</sup>   | -.966 <sup>c</sup>    |
| Asymp. Sig. (2-tailed)       | .020                    | .053                    | .133                  | .334                  |

| Test Statistics <sup>a</sup> |                       |                       |                       |                       |
|------------------------------|-----------------------|-----------------------|-----------------------|-----------------------|
|                              | T4DRUID.A - T4DRUID.C | T5DRUID.A - T5DRUID.C | T6DRUID.A - T6DRUID.C | T7DRUID.A - T7DRUID.C |
| Z                            | -.327 <sup>c</sup>    | -.189 <sup>b</sup>    | -.952 <sup>c</sup>    | -.541 <sup>c</sup>    |
| Asymp. Sig. (2-tailed)       | .744                  | .850                  | .341                  | .588                  |

| Test Statistics <sup>a</sup> |                       |                       |                         |                         |
|------------------------------|-----------------------|-----------------------|-------------------------|-------------------------|
|                              | T8DRUID.A - T8DRUID.C | T9DRUID.A - T9DRUID.C | T10DRUID.A - T10DRUID.C | T11DRUID.A - T11DRUID.C |
| Z                            | -.971 <sup>c</sup>    | -.121 <sup>b</sup>    | -.093 <sup>c</sup>      | -1.515 <sup>b</sup>     |
| Asymp. Sig. (2-tailed)       | .332                  | .904                  | .926                    | .130                    |

### Test Statistics<sup>a</sup>

|                        | T12DRUID.A -<br>T12DRUID.C |
|------------------------|----------------------------|
| Z                      | -.501 <sup>c</sup>         |
| Asymp. Sig. (2-tailed) | .616                       |

- a. Wilcoxon Signed Ranks Test
- b. Based on positive ranks.
- c. Based on negative ranks.

### NPar Tests

#### Notes

|                               |                                       |                                                                                                        |
|-------------------------------|---------------------------------------|--------------------------------------------------------------------------------------------------------|
| <b>Output Created</b>         |                                       | 05-MAR-2025 21:25:35                                                                                   |
| <b>Comments</b>               |                                       |                                                                                                        |
| <b>Input</b>                  | <b>Data</b>                           | /Users/dicec004/My Drive/WANA stuff/WANA Merged Data.sav                                               |
|                               | <b>Active Dataset</b>                 | DataSet1                                                                                               |
|                               | <b>Filter</b>                         | <none>                                                                                                 |
|                               | <b>Weight</b>                         | <none>                                                                                                 |
|                               | <b>Split File</b>                     | <none>                                                                                                 |
|                               | <b>N of Rows in Working Data File</b> | 20                                                                                                     |
| <b>Missing Value Handling</b> | <b>Definition of Missing</b>          | User-defined missing values are treated as missing.                                                    |
|                               | <b>Cases Used</b>                     | Statistics for each test are based on all cases with valid data for the variable(s) used in that test. |

### Notes

|                               |                                       |                                                                                                               |
|-------------------------------|---------------------------------------|---------------------------------------------------------------------------------------------------------------|
| <b>Output Created</b>         |                                       | <b>05-MAR-2025 21:25:35</b>                                                                                   |
| <b>Comments</b>               |                                       |                                                                                                               |
| <b>Input</b>                  | <b>Data</b>                           | <b>/Users/dicec004/My Drive/WANA stuff/WANA Merged Data.sav</b>                                               |
|                               | <b>Active Dataset</b>                 | <b>DataSet1</b>                                                                                               |
|                               | <b>Filter</b>                         | <b>&lt;none&gt;</b>                                                                                           |
|                               | <b>Weight</b>                         | <b>&lt;none&gt;</b>                                                                                           |
|                               | <b>Split File</b>                     | <b>&lt;none&gt;</b>                                                                                           |
|                               | <b>N of Rows in Working Data File</b> | <b>20</b>                                                                                                     |
| <b>Missing Value Handling</b> | <b>Definition of Missing</b>          | <b>User-defined missing values are treated as missing.</b>                                                    |
|                               | <b>Cases Used</b>                     | <b>Statistics for each test are based on all cases with valid data for the variable(s) used in that test.</b> |

## Notes

### Syntax

```
NPART TESTS
/WILCOXON=T0SHAS3.
A T1SHAS3.A T2SHAS3.A
T3SHAS3.A T4SHAS3.A
T5SHAS3.A T6SHAS3.A
T7SHAS3.A T8SHAS3.A
T9SHAS3.A T10SHAS3.A
T11SHAS3.A
T12SHAS3.A
T0SHAS3.B T1SHAS3.
B T2SHAS3.B T3SHAS3.B
T4SHAS3.B T5SHAS3.B
T6SHAS3.B T7SHAS3.B
T8SHAS3.B T9SHAS3.B
T10SHAS3.B
T11SHAS3.B
T12SHAS3.B
T0SHAS3.C T1SHAS3.
C T2SHAS3.C T3SHAS3.C
T4SHAS3.C T5SHAS3.C
T6SHAS3.C T7SHAS3.C
T8SHAS3.C T9SHAS3.C
T10SHAS3.C
T11SHAS3.C
T12SHAS3.C
WITH
T0SHAS3.B T1SHAS3.
B T2SHAS3.B T3SHAS3.B
T4SHAS3.B T5SHAS3.B
T6SHAS3.B T7SHAS3.B
T8SHAS3.B T9SHAS3.B
T10SHAS3.B
T11SHAS3.B
T12SHAS3.B
T0SHAS3.C T1SHAS3.
C T2SHAS3.C T3SHAS3.C
T4SHAS3.C T5SHAS3.C
T6SHAS3.C T7SHAS3.C
T8SHAS3.C T9SHAS3.C
T10SHAS3.C
T11SHAS3.C
T12SHAS3.C
T0SHAS3.A T1SHAS3.
A T2SHAS3.A T3SHAS3.A
T4SHAS3.A T5SHAS3.A
T6SHAS3.A T7SHAS3.A
T8SHAS3.A T9SHAS3.A
T10SHAS3.A
T11SHAS3.A
T12SHAS3.A (PAIRED)
/STATISTICS
DESCRIPTIVES
/MISSING ANALYSIS.
```

### Notes

|           |                                      |             |
|-----------|--------------------------------------|-------------|
| Resources | Processor Time                       | 00:00:00.06 |
|           | Elapsed Time                         | 00:00:00.00 |
|           | Number of Cases Allowed <sup>a</sup> | 71493       |

a. Based on availability of workspace memory.

### Descriptive Statistics

|            | N  | Mean | Std. Deviation | Minimum | Maximum |
|------------|----|------|----------------|---------|---------|
| T0SHAS3.A  | 19 | 1.05 | .229           | 1       | 2       |
| T1SHAS3.A  | 16 | 1.13 | .342           | 1       | 2       |
| T2SHAS3.A  | 17 | 1.29 | .588           | 1       | 3       |
| T3SHAS3.A  | 19 | 1.21 | .535           | 1       | 3       |
| T4SHAS3.A  | 19 | 1.11 | .315           | 1       | 2       |
| T5SHAS3.A  | 19 | 1.74 | 1.368          | 1       | 6       |
| T6SHAS3.A  | 19 | 1.47 | .772           | 1       | 4       |
| T7SHAS3.A  | 19 | 1.74 | 1.522          | 1       | 7       |
| T8SHAS3.A  | 19 | 1.58 | .838           | 1       | 3       |
| T9SHAS3.A  | 19 | 1.42 | .769           | 1       | 3       |
| T10SHAS3.A | 19 | 1.26 | .733           | 1       | 4       |
| T11SHAS3.A | 18 | 1.17 | .383           | 1       | 2       |
| T12SHAS3.A | 18 | 1.11 | .323           | 1       | 2       |
| T0SHAS3.B  | 19 | 1.00 | .000           | 1       | 1       |
| T1SHAS3.B  | 18 | 1.06 | .236           | 1       | 2       |
| T2SHAS3.B  | 19 | 1.00 | .000           | 1       | 1       |
| T3SHAS3.B  | 19 | 1.00 | .000           | 1       | 1       |
| T4SHAS3.B  | 19 | 1.00 | .000           | 1       | 1       |
| T5SHAS3.B  | 19 | 1.21 | .535           | 1       | 3       |
| T6SHAS3.B  | 19 | 1.11 | .315           | 1       | 2       |
| T7SHAS3.B  | 19 | 1.11 | .459           | 1       | 3       |
| T8SHAS3.B  | 18 | 1.00 | .000           | 1       | 1       |
| T9SHAS3.B  | 19 | 1.00 | .000           | 1       | 1       |
| T10SHAS3.B | 19 | 1.00 | .000           | 1       | 1       |
| T11SHAS3.B | 18 | 1.06 | .236           | 1       | 2       |
| T12SHAS3.B | 17 | 1.06 | .243           | 1       | 2       |
| T0SHAS3.C  | 18 | 1.06 | .236           | 1       | 2       |
| T1SHAS3.C  | 18 | 1.06 | .236           | 1       | 2       |
| T2SHAS3.C  | 17 | 1.06 | .243           | 1       | 2       |
| T3SHAS3.C  | 18 | 1.28 | .575           | 1       | 3       |
| T4SHAS3.C  | 18 | 1.33 | .594           | 1       | 3       |
| T5SHAS3.C  | 18 | 1.39 | .778           | 1       | 4       |
| T6SHAS3.C  | 18 | 1.67 | .907           | 1       | 4       |

### Descriptive Statistics

|            | N  | Mean | Std. Deviation | Minimum | Maximum |
|------------|----|------|----------------|---------|---------|
| T7SHAS3.C  | 18 | 1.50 | .786           | 1       | 3       |
| T8SHAS3.C  | 18 | 1.22 | .428           | 1       | 2       |
| T9SHAS3.C  | 18 | 1.11 | .323           | 1       | 2       |
| T10SHAS3.C | 18 | 1.06 | .236           | 1       | 2       |
| T11SHAS3.C | 17 | 1.06 | .243           | 1       | 2       |
| T12SHAS3.C | 17 | 1.12 | .332           | 1       | 2       |

### Wilcoxon Signed Ranks Test

#### Ranks

|                       |                | N               | Mean Rank | Sum of Ranks |
|-----------------------|----------------|-----------------|-----------|--------------|
| T0SHAS3.B - T0SHAS3.A | Negative Ranks | 1 <sup>a</sup>  | 1.00      | 1.00         |
|                       | Positive Ranks | 0 <sup>b</sup>  | .00       | .00          |
|                       | Ties           | 18 <sup>c</sup> |           |              |
|                       | Total          | 19              |           |              |
| T1SHAS3.B - T1SHAS3.A | Negative Ranks | 2 <sup>d</sup>  | 2.00      | 4.00         |
|                       | Positive Ranks | 1 <sup>e</sup>  | 2.00      | 2.00         |
|                       | Ties           | 12 <sup>f</sup> |           |              |
|                       | Total          | 15              |           |              |
| T2SHAS3.B - T2SHAS3.A | Negative Ranks | 4 <sup>g</sup>  | 2.50      | 10.00        |
|                       | Positive Ranks | 0 <sup>h</sup>  | .00       | .00          |
|                       | Ties           | 13 <sup>i</sup> |           |              |
|                       | Total          | 17              |           |              |
| T3SHAS3.B - T3SHAS3.A | Negative Ranks | 3 <sup>j</sup>  | 2.00      | 6.00         |
|                       | Positive Ranks | 0 <sup>k</sup>  | .00       | .00          |
|                       | Ties           | 16 <sup>l</sup> |           |              |
|                       | Total          | 19              |           |              |
| T4SHAS3.B - T4SHAS3.A | Negative Ranks | 2 <sup>m</sup>  | 1.50      | 3.00         |
|                       | Positive Ranks | 0 <sup>n</sup>  | .00       | .00          |
|                       | Ties           | 17 <sup>o</sup> |           |              |
|                       | Total          | 19              |           |              |
| T5SHAS3.B - T5SHAS3.A | Negative Ranks | 6 <sup>p</sup>  | 4.33      | 26.00        |
|                       | Positive Ranks | 1 <sup>q</sup>  | 2.00      | 2.00         |
|                       | Ties           | 12 <sup>r</sup> |           |              |
|                       | Total          | 19              |           |              |
| T6SHAS3.B - T6SHAS3.A | Negative Ranks | 6 <sup>s</sup>  | 4.08      | 24.50        |
|                       | Positive Ranks | 1 <sup>t</sup>  | 3.50      | 3.50         |
|                       | Ties           | 12 <sup>u</sup> |           |              |
|                       | Total          | 19              |           |              |

### Ranks

|                         |                | N                | Mean Rank | Sum of Ranks |
|-------------------------|----------------|------------------|-----------|--------------|
| T7SHAS3.B - T7SHAS3.A   | Negative Ranks | 6 <sup>v</sup>   | 3.50      | 21.00        |
|                         | Positive Ranks | 0 <sup>w</sup>   | .00       | .00          |
|                         | Ties           | 13 <sup>x</sup>  |           |              |
|                         | Total          | 19               |           |              |
| T8SHAS3.B - T8SHAS3.A   | Negative Ranks | 7 <sup>y</sup>   | 4.00      | 28.00        |
|                         | Positive Ranks | 0 <sup>z</sup>   | .00       | .00          |
|                         | Ties           | 11 <sup>aa</sup> |           |              |
|                         | Total          | 18               |           |              |
| T9SHAS3.B - T9SHAS3.A   | Negative Ranks | 5 <sup>ab</sup>  | 3.00      | 15.00        |
|                         | Positive Ranks | 0 <sup>ac</sup>  | .00       | .00          |
|                         | Ties           | 14 <sup>ad</sup> |           |              |
|                         | Total          | 19               |           |              |
| T10SHAS3.B - T10SHAS3.A | Negative Ranks | 3 <sup>ae</sup>  | 2.00      | 6.00         |
|                         | Positive Ranks | 0 <sup>af</sup>  | .00       | .00          |
|                         | Ties           | 16 <sup>ag</sup> |           |              |
|                         | Total          | 19               |           |              |
| T11SHAS3.B - T11SHAS3.A | Negative Ranks | 2 <sup>ah</sup>  | 1.50      | 3.00         |
|                         | Positive Ranks | 0 <sup>ai</sup>  | .00       | .00          |
|                         | Ties           | 15 <sup>aj</sup> |           |              |
|                         | Total          | 17               |           |              |
| T12SHAS3.B - T12SHAS3.A | Negative Ranks | 1 <sup>ak</sup>  | 1.50      | 1.50         |
|                         | Positive Ranks | 1 <sup>al</sup>  | 1.50      | 1.50         |
|                         | Ties           | 14 <sup>am</sup> |           |              |
|                         | Total          | 16               |           |              |
| T0SHAS3.C - T0SHAS3.B   | Negative Ranks | 0 <sup>an</sup>  | .00       | .00          |
|                         | Positive Ranks | 1 <sup>ao</sup>  | 1.00      | 1.00         |
|                         | Ties           | 17 <sup>ap</sup> |           |              |
|                         | Total          | 18               |           |              |
| T1SHAS3.C - T1SHAS3.B   | Negative Ranks | 0 <sup>aq</sup>  | .00       | .00          |
|                         | Positive Ranks | 0 <sup>ar</sup>  | .00       | .00          |
|                         | Ties           | 17 <sup>as</sup> |           |              |
|                         | Total          | 17               |           |              |
| T2SHAS3.C - T2SHAS3.B   | Negative Ranks | 0 <sup>at</sup>  | .00       | .00          |
|                         | Positive Ranks | 1 <sup>au</sup>  | 1.00      | 1.00         |
|                         | Ties           | 16 <sup>av</sup> |           |              |
|                         | Total          | 17               |           |              |
| T3SHAS3.C - T3SHAS3.B   | Negative Ranks | 0 <sup>aw</sup>  | .00       | .00          |
|                         | Positive Ranks | 4 <sup>ax</sup>  | 2.50      | 10.00        |

### Ranks

|                         |                | N                | Mean Rank | Sum of Ranks |
|-------------------------|----------------|------------------|-----------|--------------|
|                         | Ties           | 14 <sup>ay</sup> |           |              |
|                         | Total          | 18               |           |              |
| T4SHAS3.C - T4SHAS3.B   | Negative Ranks | 0 <sup>az</sup>  | .00       | .00          |
|                         | Positive Ranks | 5 <sup>ba</sup>  | 3.00      | 15.00        |
|                         | Ties           | 13 <sup>bb</sup> |           |              |
|                         | Total          | 18               |           |              |
|                         |                |                  |           |              |
| T5SHAS3.C - T5SHAS3.B   | Negative Ranks | 2 <sup>bc</sup>  | 2.50      | 5.00         |
|                         | Positive Ranks | 3 <sup>bd</sup>  | 3.33      | 10.00        |
|                         | Ties           | 13 <sup>be</sup> |           |              |
|                         | Total          | 18               |           |              |
| T6SHAS3.C - T6SHAS3.B   | Negative Ranks | 1 <sup>bf</sup>  | 3.50      | 3.50         |
|                         | Positive Ranks | 8 <sup>bg</sup>  | 5.19      | 41.50        |
|                         | Ties           | 9 <sup>bh</sup>  |           |              |
|                         | Total          | 18               |           |              |
| T7SHAS3.C - T7SHAS3.B   | Negative Ranks | 0 <sup>bi</sup>  | .00       | .00          |
|                         | Positive Ranks | 5 <sup>bj</sup>  | 3.00      | 15.00        |
|                         | Ties           | 13 <sup>bk</sup> |           |              |
|                         | Total          | 18               |           |              |
| T8SHAS3.C - T8SHAS3.B   | Negative Ranks | 0 <sup>bl</sup>  | .00       | .00          |
|                         | Positive Ranks | 4 <sup>bm</sup>  | 2.50      | 10.00        |
|                         | Ties           | 13 <sup>bn</sup> |           |              |
|                         | Total          | 17               |           |              |
| T9SHAS3.C - T9SHAS3.B   | Negative Ranks | 0 <sup>bo</sup>  | .00       | .00          |
|                         | Positive Ranks | 2 <sup>bp</sup>  | 1.50      | 3.00         |
|                         | Ties           | 16 <sup>bq</sup> |           |              |
|                         | Total          | 18               |           |              |
| T10SHAS3.C - T10SHAS3.B | Negative Ranks | 0 <sup>br</sup>  | .00       | .00          |
|                         | Positive Ranks | 1 <sup>bs</sup>  | 1.00      | 1.00         |
|                         | Ties           | 17 <sup>bt</sup> |           |              |
|                         | Total          | 18               |           |              |
| T11SHAS3.C - T11SHAS3.B | Negative Ranks | 1 <sup>bu</sup>  | 1.50      | 1.50         |
|                         | Positive Ranks | 1 <sup>bv</sup>  | 1.50      | 1.50         |
|                         | Ties           | 14 <sup>bw</sup> |           |              |
|                         | Total          | 16               |           |              |
| T12SHAS3.C - T12SHAS3.B | Negative Ranks | 1 <sup>bx</sup>  | 2.00      | 2.00         |
|                         | Positive Ranks | 2 <sup>by</sup>  | 2.00      | 4.00         |
|                         | Ties           | 12 <sup>bz</sup> |           |              |
|                         | Total          | 15               |           |              |

### Ranks

|                       |                | N                | Mean Rank | Sum of Ranks |
|-----------------------|----------------|------------------|-----------|--------------|
| T0SHAS3.A - T0SHAS3.C | Negative Ranks | 1 <sup>ca</sup>  | 1.50      | 1.50         |
|                       | Positive Ranks | 1 <sup>cb</sup>  | 1.50      | 1.50         |
|                       | Ties           | 16 <sup>cc</sup> |           |              |
|                       | Total          | 18               |           |              |
| T1SHAS3.A - T1SHAS3.C | Negative Ranks | 1 <sup>cd</sup>  | 2.00      | 2.00         |
|                       | Positive Ranks | 2 <sup>ce</sup>  | 2.00      | 4.00         |
|                       | Ties           | 13 <sup>cf</sup> |           |              |
|                       | Total          | 16               |           |              |
| T2SHAS3.A - T2SHAS3.C | Negative Ranks | 1 <sup>cg</sup>  | 2.50      | 2.50         |
|                       | Positive Ranks | 4 <sup>ch</sup>  | 3.13      | 12.50        |
|                       | Ties           | 11 <sup>ci</sup> |           |              |
|                       | Total          | 16               |           |              |
| T3SHAS3.A - T3SHAS3.C | Negative Ranks | 3 <sup>cj</sup>  | 2.83      | 8.50         |
|                       | Positive Ranks | 2 <sup>ck</sup>  | 3.25      | 6.50         |
|                       | Ties           | 13 <sup>cl</sup> |           |              |
|                       | Total          | 18               |           |              |
| T4SHAS3.A - T4SHAS3.C | Negative Ranks | 3 <sup>cm</sup>  | 2.00      | 6.00         |
|                       | Positive Ranks | 0 <sup>cn</sup>  | .00       | .00          |
|                       | Ties           | 15 <sup>co</sup> |           |              |
|                       | Total          | 18               |           |              |
| T5SHAS3.A - T5SHAS3.C | Negative Ranks | 1 <sup>cp</sup>  | 6.00      | 6.00         |
|                       | Positive Ranks | 6 <sup>cq</sup>  | 3.67      | 22.00        |
|                       | Ties           | 11 <sup>cr</sup> |           |              |
|                       | Total          | 18               |           |              |
| T6SHAS3.A - T6SHAS3.C | Negative Ranks | 7 <sup>cs</sup>  | 5.71      | 40.00        |
|                       | Positive Ranks | 3 <sup>ct</sup>  | 5.00      | 15.00        |
|                       | Ties           | 8 <sup>cu</sup>  |           |              |
|                       | Total          | 18               |           |              |
| T7SHAS3.A - T7SHAS3.C | Negative Ranks | 4 <sup>cv</sup>  | 4.00      | 16.00        |
|                       | Positive Ranks | 3 <sup>cw</sup>  | 4.00      | 12.00        |
|                       | Ties           | 11 <sup>cx</sup> |           |              |
|                       | Total          | 18               |           |              |
| T8SHAS3.A - T8SHAS3.C | Negative Ranks | 1 <sup>cy</sup>  | 2.00      | 2.00         |
|                       | Positive Ranks | 4 <sup>cz</sup>  | 3.25      | 13.00        |
|                       | Ties           | 13 <sup>da</sup> |           |              |
|                       | Total          | 18               |           |              |
| T9SHAS3.A - T9SHAS3.C | Negative Ranks | 0 <sup>db</sup>  | .00       | .00          |
|                       | Positive Ranks | 3 <sup>dc</sup>  | 2.00      | 6.00         |

### Ranks

|                         |                | N                | Mean Rank | Sum of Ranks |
|-------------------------|----------------|------------------|-----------|--------------|
|                         | Ties           | 15 <sup>dd</sup> |           |              |
|                         | Total          | 18               |           |              |
| T10SHAS3.A - T10SHAS3.C | Negative Ranks | 0 <sup>de</sup>  | .00       | .00          |
|                         | Positive Ranks | 1 <sup>df</sup>  | 1.00      | 1.00         |
|                         | Ties           | 17 <sup>dg</sup> |           |              |
|                         | Total          | 18               |           |              |
| T11SHAS3.A - T11SHAS3.C | Negative Ranks | 1 <sup>dh</sup>  | 2.00      | 2.00         |
|                         | Positive Ranks | 2 <sup>di</sup>  | 2.00      | 4.00         |
|                         | Ties           | 13 <sup>dj</sup> |           |              |
|                         | Total          | 16               |           |              |
| T12SHAS3.A - T12SHAS3.C | Negative Ranks | 2 <sup>dk</sup>  | 2.00      | 4.00         |
|                         | Positive Ranks | 1 <sup>dl</sup>  | 2.00      | 2.00         |
|                         | Ties           | 13 <sup>dm</sup> |           |              |
|                         | Total          | 16               |           |              |

- a. T0SHAS3.B < T0SHAS3.A
- b. T0SHAS3.B > T0SHAS3.A
- c. T0SHAS3.B = T0SHAS3.A
- d. T1SHAS3.B < T1SHAS3.A
- e. T1SHAS3.B > T1SHAS3.A
- f. T1SHAS3.B = T1SHAS3.A
- g. T2SHAS3.B < T2SHAS3.A
- h. T2SHAS3.B > T2SHAS3.A
- i. T2SHAS3.B = T2SHAS3.A
- j. T3SHAS3.B < T3SHAS3.A
- k. T3SHAS3.B > T3SHAS3.A
- l. T3SHAS3.B = T3SHAS3.A
- m. T4SHAS3.B < T4SHAS3.A
- n. T4SHAS3.B > T4SHAS3.A
- o. T4SHAS3.B = T4SHAS3.A
- p. T4SHAS3.B = T4SHAS3.A

p. T5SHAS3.B < T5SHAS3.A  
q. T5SHAS3.B > T5SHAS3.A  
r. T5SHAS3.B = T5SHAS3.A  
s. T6SHAS3.B < T6SHAS3.A  
t. T6SHAS3.B > T6SHAS3.A  
u. T6SHAS3.B = T6SHAS3.A  
v. T7SHAS3.B < T7SHAS3.A  
w. T7SHAS3.B > T7SHAS3.A  
x. T7SHAS3.B = T7SHAS3.A  
y. T8SHAS3.B < T8SHAS3.A  
z. T8SHAS3.B > T8SHAS3.A  
aa. T8SHAS3.B = T8SHAS3.A  
ab. T9SHAS3.B < T9SHAS3.A  
ac. T9SHAS3.B > T9SHAS3.A  
ad. T9SHAS3.B = T9SHAS3.A  
ae. T10SHAS3.B < T10SHAS3.A  
af. T10SHAS3.B > T10SHAS3.A  
ag. T10SHAS3.B = T10SHAS3.A  
ah. T11SHAS3.B < T11SHAS3.A  
ai. T11SHAS3.B > T11SHAS3.A  
aj. T11SHAS3.B = T11SHAS3.A  
ak. T12SHAS3.B < T12SHAS3.A  
al. T12SHAS3.B > T12SHAS3.A  
am. T12SHAS3.B = T12SHAS3.A  
an. T0SHAS3.C < T0SHAS3.B  
ao. T0SHAS3.C > T0SHAS3.B  
ap. T0SHAS3.C = T0SHAS3.B  
aq. T1SHAS3.C < T1SHAS3.B  
ar. T1SHAS3.C > T1SHAS3.B  
as. T1SHAS3.C = T1SHAS3.B  
at. T2SHAS3.C < T2SHAS3.B  
au. T2SHAS3.C > T2SHAS3.B  
av. T2SHAS3.C = T2SHAS3.B  
aw. T3SHAS3.C < T3SHAS3.B  
ax. T3SHAS3.C > T3SHAS3.B  
ay. T3SHAS3.C = T3SHAS3.B  
az. T4SHAS3.C < T4SHAS3.B  
ba. T4SHAS3.C > T4SHAS3.B  
bb. T4SHAS3.C = T4SHAS3.B  
bc. T5SHAS3.C < T5SHAS3.B  
bd. T5SHAS3.C > T5SHAS3.B  
be. T5SHAS3.C = T5SHAS3.B  
bf. T6SHAS3.C < T6SHAS3.B  
bg. T6SHAS3.C > T6SHAS3.B  
bh. T6SHAS3.C = T6SHAS3.B

bh. T6SHAS3.C = T6SHAS3.B  
bi. T7SHAS3.C < T7SHAS3.B  
bj. T7SHAS3.C > T7SHAS3.B  
bk. T7SHAS3.C = T7SHAS3.B  
bl. T8SHAS3.C < T8SHAS3.B  
bm. T8SHAS3.C > T8SHAS3.B  
bn. T8SHAS3.C = T8SHAS3.B  
bo. T9SHAS3.C < T9SHAS3.B  
bp. T9SHAS3.C > T9SHAS3.B  
bq. T9SHAS3.C = T9SHAS3.B  
br. T10SHAS3.C < T10SHAS3.B  
bs. T10SHAS3.C > T10SHAS3.B  
bt. T10SHAS3.C = T10SHAS3.B  
bu. T11SHAS3.C < T11SHAS3.B  
bv. T11SHAS3.C > T11SHAS3.B  
bw. T11SHAS3.C = T11SHAS3.B  
bx. T12SHAS3.C < T12SHAS3.B  
by. T12SHAS3.C > T12SHAS3.B  
bz. T12SHAS3.C = T12SHAS3.B  
ca. T0SHAS3.A < T0SHAS3.C  
cb. T0SHAS3.A > T0SHAS3.C  
cc. T0SHAS3.A = T0SHAS3.C  
cd. T1SHAS3.A < T1SHAS3.C  
ce. T1SHAS3.A > T1SHAS3.C  
cf. T1SHAS3.A = T1SHAS3.C  
cg. T2SHAS3.A < T2SHAS3.C  
ch. T2SHAS3.A > T2SHAS3.C  
ci. T2SHAS3.A = T2SHAS3.C  
cj. T3SHAS3.A < T3SHAS3.C  
ck. T3SHAS3.A > T3SHAS3.C  
cl. T3SHAS3.A = T3SHAS3.C  
cm. T4SHAS3.A < T4SHAS3.C  
cn. T4SHAS3.A > T4SHAS3.C  
co. T4SHAS3.A = T4SHAS3.C  
cp. T5SHAS3.A < T5SHAS3.C  
cq. T5SHAS3.A > T5SHAS3.C  
cr. T5SHAS3.A = T5SHAS3.C  
cs. T6SHAS3.A < T6SHAS3.C  
ct. T6SHAS3.A > T6SHAS3.C  
cu. T6SHAS3.A = T6SHAS3.C  
cv. T7SHAS3.A < T7SHAS3.C  
cw. T7SHAS3.A > T7SHAS3.C  
cx. T7SHAS3.A = T7SHAS3.C  
cy. T8SHAS3.A < T8SHAS3.C  
-- T8SHAS3.A = T8SHAS3.C

- cz. T8SHAS3.A > T8SHAS3.C
- da. T8SHAS3.A = T8SHAS3.C
- db. T9SHAS3.A < T9SHAS3.C
- dc. T9SHAS3.A > T9SHAS3.C
- dd. T9SHAS3.A = T9SHAS3.C
- de. T10SHAS3.A < T10SHAS3.C
- df. T10SHAS3.A > T10SHAS3.C
- dg. T10SHAS3.A = T10SHAS3.C
- dh. T11SHAS3.A < T11SHAS3.C
- di. T11SHAS3.A > T11SHAS3.C
- dj. T11SHAS3.A = T11SHAS3.C
- dk. T12SHAS3.A < T12SHAS3.C
- dl. T12SHAS3.A > T12SHAS3.C
- dm. T12SHAS3.A = T12SHAS3.C

**Test Statistics<sup>a</sup>**

|                        | T0SHAS3.B -<br>T0SHAS3.A | T1SHAS3.B -<br>T1SHAS3.A | T2SHAS3.B -<br>T2SHAS3.A | T3SHAS3.B -<br>T3SHAS3.A |
|------------------------|--------------------------|--------------------------|--------------------------|--------------------------|
| Z                      | -1.000 <sup>b</sup>      | -.577 <sup>b</sup>       | -1.890 <sup>b</sup>      | -1.633 <sup>b</sup>      |
| Asymp. Sig. (2-tailed) | .317                     | .564                     | .059                     | .102                     |

**Test Statistics<sup>a</sup>**

|                        | T4SHAS3.B -<br>T4SHAS3.A | T5SHAS3.B -<br>T5SHAS3.A | T6SHAS3.B -<br>T6SHAS3.A | T7SHAS3.B -<br>T7SHAS3.A |
|------------------------|--------------------------|--------------------------|--------------------------|--------------------------|
| Z                      | -1.414 <sup>b</sup>      | -2.058 <sup>b</sup>      | -1.897 <sup>b</sup>      | -2.264 <sup>b</sup>      |
| Asymp. Sig. (2-tailed) | .157                     | .040                     | .058                     | .024                     |

**Test Statistics<sup>a</sup>**

|                        | T8SHAS3.B -<br>T8SHAS3.A | T9SHAS3.B -<br>T9SHAS3.A | T10SHAS3.B -<br>T10SHAS3.A | T11SHAS3.B -<br>T11SHAS3.A |
|------------------------|--------------------------|--------------------------|----------------------------|----------------------------|
| Z                      | -2.428 <sup>b</sup>      | -2.070 <sup>b</sup>      | -1.633 <sup>b</sup>        | -1.414 <sup>b</sup>        |
| Asymp. Sig. (2-tailed) | .015                     | .038                     | .102                       | .157                       |

**Test Statistics<sup>a</sup>**

|                        | T12SHAS3.B -<br>T12SHAS3.A | T0SHAS3.C -<br>T0SHAS3.B | T1SHAS3.C -<br>T1SHAS3.B | T2SHAS3.C -<br>T2SHAS3.B |
|------------------------|----------------------------|--------------------------|--------------------------|--------------------------|
| Z                      | .000 <sup>c</sup>          | -1.000 <sup>d</sup>      | .000 <sup>c</sup>        | -1.000 <sup>d</sup>      |
| Asymp. Sig. (2-tailed) | 1.000                      | .317                     | 1.000                    | .317                     |

**Test Statistics<sup>a</sup>**

|                        | T3SHAS3.C -<br>T3SHAS3.B | T4SHAS3.C -<br>T4SHAS3.B | T5SHAS3.C -<br>T5SHAS3.B | T6SHAS3.C -<br>T6SHAS3.B |
|------------------------|--------------------------|--------------------------|--------------------------|--------------------------|
| Z                      | -1.890 <sup>d</sup>      | -2.121 <sup>d</sup>      | -.707 <sup>d</sup>       | -2.332 <sup>d</sup>      |
| Asymp. Sig. (2-tailed) | .059                     | .034                     | .480                     | .020                     |

**Test Statistics<sup>a</sup>**

|                        | T7SHAS3.C - T7SHAS3.B | T8SHAS3.C - T8SHAS3.B | T9SHAS3.C - T9SHAS3.B | T10SHAS3.C - T10SHAS3.B |
|------------------------|-----------------------|-----------------------|-----------------------|-------------------------|
| Z                      | -2.070 <sup>d</sup>   | -2.000 <sup>d</sup>   | -1.414 <sup>d</sup>   | -1.000 <sup>d</sup>     |
| Asymp. Sig. (2-tailed) | .038                  | .046                  | .157                  | .317                    |

**Test Statistics<sup>a</sup>**

|                        | T11SHAS3.C - T11SHAS3.B | T12SHAS3.C - T12SHAS3.B | T0SHAS3.A - T0SHAS3.C | T1SHAS3.A - T1SHAS3.C |
|------------------------|-------------------------|-------------------------|-----------------------|-----------------------|
| Z                      | .000 <sup>c</sup>       | -.577 <sup>d</sup>      | .000 <sup>c</sup>     | -.577 <sup>d</sup>    |
| Asymp. Sig. (2-tailed) | 1.000                   | .564                    | 1.000                 | .564                  |

**Test Statistics<sup>a</sup>**

|                        | T2SHAS3.A - T2SHAS3.C | T3SHAS3.A - T3SHAS3.C | T4SHAS3.A - T4SHAS3.C | T5SHAS3.A - T5SHAS3.C |
|------------------------|-----------------------|-----------------------|-----------------------|-----------------------|
| Z                      | -1.414 <sup>d</sup>   | -.276 <sup>b</sup>    | -1.633 <sup>b</sup>   | -1.377 <sup>d</sup>   |
| Asymp. Sig. (2-tailed) | .157                  | .783                  | .102                  | .168                  |

**Test Statistics<sup>a</sup>**

|                        | T6SHAS3.A - T6SHAS3.C | T7SHAS3.A - T7SHAS3.C | T8SHAS3.A - T8SHAS3.C | T9SHAS3.A - T9SHAS3.C |
|------------------------|-----------------------|-----------------------|-----------------------|-----------------------|
| Z                      | -1.387 <sup>b</sup>   | -.378 <sup>b</sup>    | -1.518 <sup>d</sup>   | -1.633 <sup>d</sup>   |
| Asymp. Sig. (2-tailed) | .166                  | .705                  | .129                  | .102                  |

**Test Statistics<sup>a</sup>**

|                        | T10SHAS3.A - T10SHAS3.C | T11SHAS3.A - T11SHAS3.C | T12SHAS3.A - T12SHAS3.C |
|------------------------|-------------------------|-------------------------|-------------------------|
| Z                      | -1.000 <sup>d</sup>     | -.577 <sup>d</sup>      | -.577 <sup>b</sup>      |
| Asymp. Sig. (2-tailed) | .317                    | .564                    | .564                    |

a. Wilcoxon Signed Ranks Test

b. Based on positive ranks.

c. The sum of negative ranks equals the sum of positive ranks.

d. Based on negative ranks.

**NPar Tests**

### Notes

|                               |                                       |                                                                                                               |
|-------------------------------|---------------------------------------|---------------------------------------------------------------------------------------------------------------|
| <b>Output Created</b>         |                                       | <b>05-MAR-2025 21:25:35</b>                                                                                   |
| <b>Comments</b>               |                                       |                                                                                                               |
| <b>Input</b>                  | <b>Data</b>                           | <b>/Users/dicec004/My Drive/WANA stuff/WANA Merged Data.sav</b>                                               |
|                               | <b>Active Dataset</b>                 | <b>DataSet1</b>                                                                                               |
|                               | <b>Filter</b>                         | <b>&lt;none&gt;</b>                                                                                           |
|                               | <b>Weight</b>                         | <b>&lt;none&gt;</b>                                                                                           |
|                               | <b>Split File</b>                     | <b>&lt;none&gt;</b>                                                                                           |
|                               | <b>N of Rows in Working Data File</b> | <b>20</b>                                                                                                     |
| <b>Missing Value Handling</b> | <b>Definition of Missing</b>          | <b>User-defined missing values are treated as missing.</b>                                                    |
|                               | <b>Cases Used</b>                     | <b>Statistics for each test are based on all cases with valid data for the variable(s) used in that test.</b> |

## Notes

### Syntax

```
NPART TESTS
/WILCOXON=T0SHAS4.
A T1SHAS4.A T2SHAS4.A
T3SHAS4.A T4SHAS4.A
T5SHAS4.A T6SHAS4.A
T7SHAS4.A T8SHAS4.A
T9SHAS4.A T10SHAS4.A
T11SHAS4.A
T12SHAS4.A
T0SHAS4.B T1SHAS4.
B T2SHAS4.B T3SHAS4.B
T4SHAS4.B T5SHAS4.B
T6SHAS4.B T7SHAS4.B
T8SHAS4.B T9SHAS4.B
T10SHAS4.B
T11SHAS4.B
T12SHAS4.B
T0SHAS4.C T1SHAS4.
C T2SHAS4.C T3SHAS4.C
T4SHAS4.C T5SHAS4.C
T6SHAS4.C T7SHAS4.C
T8SHAS4.C T9SHAS4.C
T10SHAS4.C
T11SHAS4.C
T12SHAS4.C
WITH
T0SHAS4.B T1SHAS4.
B T2SHAS4.B T3SHAS4.B
T4SHAS4.B T5SHAS4.B
T6SHAS4.B T7SHAS4.B
T8SHAS4.B T9SHAS4.B
T10SHAS4.B
T11SHAS4.B
T12SHAS4.B
T0SHAS4.C T1SHAS4.
C T2SHAS4.C T3SHAS4.C
T4SHAS4.C T5SHAS4.C
T6SHAS4.C T7SHAS4.C
T8SHAS4.C T9SHAS4.C
T10SHAS4.C
T11SHAS4.C
T12SHAS4.C
T0SHAS4.A T1SHAS4.
A T2SHAS4.A T3SHAS4.A
T4SHAS4.A T5SHAS4.A
T6SHAS4.A T7SHAS4.A
T8SHAS4.A T9SHAS4.A
T10SHAS4.A
T11SHAS4.A
T12SHAS4.A (PAIRED)
/STATISTICS
DESCRIPTIVES
/MISSING ANALYSIS.
```

### Notes

|           |                                      |             |
|-----------|--------------------------------------|-------------|
| Resources | Processor Time                       | 00:00:00.06 |
|           | Elapsed Time                         | 00:00:00.00 |
|           | Number of Cases Allowed <sup>a</sup> | 71493       |

a. Based on availability of workspace memory.

### Descriptive Statistics

|            | N  | Mean | Std. Deviation | Minimum | Maximum |
|------------|----|------|----------------|---------|---------|
| T0SHAS4.A  | 19 | 1.00 | .000           | 1       | 1       |
| T1SHAS4.A  | 16 | 1.00 | .000           | 1       | 1       |
| T2SHAS4.A  | 17 | 1.06 | .243           | 1       | 2       |
| T3SHAS4.A  | 19 | 1.00 | .000           | 1       | 1       |
| T4SHAS4.A  | 19 | 1.05 | .229           | 1       | 2       |
| T5SHAS4.A  | 19 | 1.37 | .684           | 1       | 3       |
| T6SHAS4.A  | 19 | 1.37 | 1.012          | 1       | 5       |
| T7SHAS4.A  | 19 | 1.37 | 1.212          | 1       | 6       |
| T8SHAS4.A  | 19 | 1.68 | 1.455          | 1       | 7       |
| T9SHAS4.A  | 19 | 1.47 | 1.219          | 1       | 6       |
| T10SHAS4.A | 19 | 1.26 | 1.147          | 1       | 6       |
| T11SHAS4.A | 19 | 1.16 | .501           | 1       | 3       |
| T12SHAS4.A | 18 | 1.28 | .826           | 1       | 4       |
| T0SHAS4.B  | 19 | 1.00 | .000           | 1       | 1       |
| T1SHAS4.B  | 18 | 1.00 | .000           | 1       | 1       |
| T2SHAS4.B  | 19 | 1.00 | .000           | 1       | 1       |
| T3SHAS4.B  | 19 | 1.00 | .000           | 1       | 1       |
| T4SHAS4.B  | 19 | 1.00 | .000           | 1       | 1       |
| T5SHAS4.B  | 19 | 1.11 | .459           | 1       | 3       |
| T6SHAS4.B  | 19 | 1.05 | .229           | 1       | 2       |
| T7SHAS4.B  | 19 | 1.11 | .315           | 1       | 2       |
| T8SHAS4.B  | 18 | 1.06 | .236           | 1       | 2       |
| T9SHAS4.B  | 19 | 1.00 | .000           | 1       | 1       |
| T10SHAS4.B | 19 | 1.00 | .000           | 1       | 1       |
| T11SHAS4.B | 18 | 1.06 | .236           | 1       | 2       |
| T12SHAS4.B | 17 | 1.00 | .000           | 1       | 1       |
| T0SHAS4.C  | 18 | 1.06 | .236           | 1       | 2       |
| T1SHAS4.C  | 18 | 1.00 | .000           | 1       | 1       |
| T2SHAS4.C  | 17 | 1.00 | .000           | 1       | 1       |
| T3SHAS4.C  | 18 | 1.06 | .236           | 1       | 2       |
| T4SHAS4.C  | 18 | 1.17 | .514           | 1       | 3       |
| T5SHAS4.C  | 18 | 1.33 | .840           | 1       | 4       |
| T6SHAS4.C  | 18 | 1.39 | .979           | 1       | 5       |

### Descriptive Statistics

|            | N  | Mean | Std. Deviation | Minimum | Maximum |
|------------|----|------|----------------|---------|---------|
| T7SHAS4.C  | 18 | 1.44 | .784           | 1       | 3       |
| T8SHAS4.C  | 18 | 1.22 | .428           | 1       | 2       |
| T9SHAS4.C  | 18 | 1.11 | .323           | 1       | 2       |
| T10SHAS4.C | 18 | 1.06 | .236           | 1       | 2       |
| T11SHAS4.C | 17 | 1.06 | .243           | 1       | 2       |
| T12SHAS4.C | 17 | 1.00 | .000           | 1       | 1       |

### Wilcoxon Signed Ranks Test

#### Ranks

|                       |                | N               | Mean Rank | Sum of Ranks |
|-----------------------|----------------|-----------------|-----------|--------------|
| T0SHAS4.B - T0SHAS4.A | Negative Ranks | 0 <sup>a</sup>  | .00       | .00          |
|                       | Positive Ranks | 0 <sup>b</sup>  | .00       | .00          |
|                       | Ties           | 19 <sup>c</sup> |           |              |
|                       | Total          | 19              |           |              |
| T1SHAS4.B - T1SHAS4.A | Negative Ranks | 0 <sup>d</sup>  | .00       | .00          |
|                       | Positive Ranks | 0 <sup>e</sup>  | .00       | .00          |
|                       | Ties           | 15 <sup>f</sup> |           |              |
|                       | Total          | 15              |           |              |
| T2SHAS4.B - T2SHAS4.A | Negative Ranks | 1 <sup>g</sup>  | 1.00      | 1.00         |
|                       | Positive Ranks | 0 <sup>h</sup>  | .00       | .00          |
|                       | Ties           | 16 <sup>i</sup> |           |              |
|                       | Total          | 17              |           |              |
| T3SHAS4.B - T3SHAS4.A | Negative Ranks | 0 <sup>j</sup>  | .00       | .00          |
|                       | Positive Ranks | 0 <sup>k</sup>  | .00       | .00          |
|                       | Ties           | 19 <sup>l</sup> |           |              |
|                       | Total          | 19              |           |              |
| T4SHAS4.B - T4SHAS4.A | Negative Ranks | 1 <sup>m</sup>  | 1.00      | 1.00         |
|                       | Positive Ranks | 0 <sup>n</sup>  | .00       | .00          |
|                       | Ties           | 18 <sup>o</sup> |           |              |
|                       | Total          | 19              |           |              |
| T5SHAS4.B - T5SHAS4.A | Negative Ranks | 4 <sup>p</sup>  | 2.50      | 10.00        |
|                       | Positive Ranks | 0 <sup>q</sup>  | .00       | .00          |
|                       | Ties           | 15 <sup>r</sup> |           |              |
|                       | Total          | 19              |           |              |
| T6SHAS4.B - T6SHAS4.A | Negative Ranks | 2 <sup>s</sup>  | 1.50      | 3.00         |
|                       | Positive Ranks | 0 <sup>t</sup>  | .00       | .00          |
|                       | Ties           | 17 <sup>u</sup> |           |              |
|                       | Total          | 19              |           |              |

### Ranks

|                         |                | N                | Mean Rank | Sum of Ranks |
|-------------------------|----------------|------------------|-----------|--------------|
| T7SHAS4.B - T7SHAS4.A   | Negative Ranks | 2 <sup>v</sup>   | 3.50      | 7.00         |
|                         | Positive Ranks | 2 <sup>w</sup>   | 1.50      | 3.00         |
|                         | Ties           | 15 <sup>x</sup>  |           |              |
|                         | Total          | 19               |           |              |
| T8SHAS4.B - T8SHAS4.A   | Negative Ranks | 6 <sup>y</sup>   | 4.25      | 25.50        |
|                         | Positive Ranks | 1 <sup>z</sup>   | 2.50      | 2.50         |
|                         | Ties           | 11 <sup>aa</sup> |           |              |
|                         | Total          | 18               |           |              |
| T9SHAS4.B - T9SHAS4.A   | Negative Ranks | 4 <sup>ab</sup>  | 2.50      | 10.00        |
|                         | Positive Ranks | 0 <sup>ac</sup>  | .00       | .00          |
|                         | Ties           | 15 <sup>ad</sup> |           |              |
|                         | Total          | 19               |           |              |
| T10SHAS4.B - T10SHAS4.A | Negative Ranks | 1 <sup>ae</sup>  | 1.00      | 1.00         |
|                         | Positive Ranks | 0 <sup>af</sup>  | .00       | .00          |
|                         | Ties           | 18 <sup>ag</sup> |           |              |
|                         | Total          | 19               |           |              |
| T11SHAS4.B - T11SHAS4.A | Negative Ranks | 2 <sup>ah</sup>  | 2.25      | 4.50         |
|                         | Positive Ranks | 1 <sup>ai</sup>  | 1.50      | 1.50         |
|                         | Ties           | 15 <sup>aj</sup> |           |              |
|                         | Total          | 18               |           |              |
| T12SHAS4.B - T12SHAS4.A | Negative Ranks | 2 <sup>ak</sup>  | 1.50      | 3.00         |
|                         | Positive Ranks | 0 <sup>al</sup>  | .00       | .00          |
|                         | Ties           | 14 <sup>am</sup> |           |              |
|                         | Total          | 16               |           |              |
| T0SHAS4.C - T0SHAS4.B   | Negative Ranks | 0 <sup>an</sup>  | .00       | .00          |
|                         | Positive Ranks | 1 <sup>ao</sup>  | 1.00      | 1.00         |
|                         | Ties           | 17 <sup>ap</sup> |           |              |
|                         | Total          | 18               |           |              |
| T1SHAS4.C - T1SHAS4.B   | Negative Ranks | 0 <sup>aq</sup>  | .00       | .00          |
|                         | Positive Ranks | 0 <sup>ar</sup>  | .00       | .00          |
|                         | Ties           | 17 <sup>as</sup> |           |              |
|                         | Total          | 17               |           |              |
| T2SHAS4.C - T2SHAS4.B   | Negative Ranks | 0 <sup>at</sup>  | .00       | .00          |
|                         | Positive Ranks | 0 <sup>au</sup>  | .00       | .00          |
|                         | Ties           | 17 <sup>av</sup> |           |              |
|                         | Total          | 17               |           |              |
| T3SHAS4.C - T3SHAS4.B   | Negative Ranks | 0 <sup>aw</sup>  | .00       | .00          |
|                         | Positive Ranks | 1 <sup>ax</sup>  | 1.00      | 1.00         |

### Ranks

|                             |                | N                | Mean Rank | Sum of Ranks |
|-----------------------------|----------------|------------------|-----------|--------------|
|                             | Ties           | 17 <sup>ay</sup> |           |              |
|                             | Total          | 18               |           |              |
| T4SHAS4.C - T4SHAS4.B       | Negative Ranks | 0 <sup>az</sup>  | .00       | .00          |
|                             | Positive Ranks | 2 <sup>ba</sup>  | 1.50      | 3.00         |
|                             | Ties           | 16 <sup>bb</sup> |           |              |
|                             | Total          | 18               |           |              |
|                             |                |                  |           |              |
| T5SHAS4.C - T5SHAS4.B       | Negative Ranks | 1 <sup>bc</sup>  | 1.00      | 1.00         |
|                             | Positive Ranks | 2 <sup>bd</sup>  | 2.50      | 5.00         |
|                             | Ties           | 15 <sup>be</sup> |           |              |
|                             | Total          | 18               |           |              |
| T6SHAS4.C - T6SHAS4.B       | Negative Ranks | 0 <sup>bf</sup>  | .00       | .00          |
|                             | Positive Ranks | 4 <sup>bg</sup>  | 2.50      | 10.00        |
|                             | Ties           | 14 <sup>bh</sup> |           |              |
|                             | Total          | 18               |           |              |
| T7SHAS4.C - T7SHAS4.B       | Negative Ranks | 2 <sup>bi</sup>  | 2.50      | 5.00         |
|                             | Positive Ranks | 5 <sup>bj</sup>  | 4.60      | 23.00        |
|                             | Ties           | 11 <sup>bk</sup> |           |              |
|                             | Total          | 18               |           |              |
| T8SHAS4.C - T8SHAS4.B       | Negative Ranks | 1 <sup>bl</sup>  | 3.00      | 3.00         |
|                             | Positive Ranks | 4 <sup>bm</sup>  | 3.00      | 12.00        |
|                             | Ties           | 12 <sup>bn</sup> |           |              |
|                             | Total          | 17               |           |              |
| T9SHAS4.C - T9SHAS4.B       | Negative Ranks | 0 <sup>bo</sup>  | .00       | .00          |
|                             | Positive Ranks | 2 <sup>bp</sup>  | 1.50      | 3.00         |
|                             | Ties           | 16 <sup>bq</sup> |           |              |
|                             | Total          | 18               |           |              |
| T10SHAS4.C - T10SHAS4.<br>B | Negative Ranks | 0 <sup>br</sup>  | .00       | .00          |
|                             | Positive Ranks | 1 <sup>bs</sup>  | 1.00      | 1.00         |
|                             | Ties           | 17 <sup>bt</sup> |           |              |
|                             | Total          | 18               |           |              |
| T11SHAS4.C - T11SHAS4.<br>B | Negative Ranks | 0 <sup>bu</sup>  | .00       | .00          |
|                             | Positive Ranks | 0 <sup>bv</sup>  | .00       | .00          |
|                             | Ties           | 16 <sup>bw</sup> |           |              |
|                             | Total          | 16               |           |              |
| T12SHAS4.C - T12SHAS4.<br>B | Negative Ranks | 0 <sup>bx</sup>  | .00       | .00          |
|                             | Positive Ranks | 0 <sup>by</sup>  | .00       | .00          |
|                             | Ties           | 15 <sup>bz</sup> |           |              |
|                             | Total          | 15               |           |              |

### Ranks

|                       |                | N                | Mean Rank | Sum of Ranks |
|-----------------------|----------------|------------------|-----------|--------------|
| T0SHAS4.A - T0SHAS4.C | Negative Ranks | 1 <sup>ca</sup>  | 1.00      | 1.00         |
|                       | Positive Ranks | 0 <sup>cb</sup>  | .00       | .00          |
|                       | Ties           | 17 <sup>cc</sup> |           |              |
|                       | Total          | 18               |           |              |
| T1SHAS4.A - T1SHAS4.C | Negative Ranks | 0 <sup>cd</sup>  | .00       | .00          |
|                       | Positive Ranks | 0 <sup>ce</sup>  | .00       | .00          |
|                       | Ties           | 16 <sup>cf</sup> |           |              |
|                       | Total          | 16               |           |              |
| T2SHAS4.A - T2SHAS4.C | Negative Ranks | 0 <sup>cg</sup>  | .00       | .00          |
|                       | Positive Ranks | 1 <sup>ch</sup>  | 1.00      | 1.00         |
|                       | Ties           | 15 <sup>ci</sup> |           |              |
|                       | Total          | 16               |           |              |
| T3SHAS4.A - T3SHAS4.C | Negative Ranks | 1 <sup>cj</sup>  | 1.00      | 1.00         |
|                       | Positive Ranks | 0 <sup>ck</sup>  | .00       | .00          |
|                       | Ties           | 17 <sup>cl</sup> |           |              |
|                       | Total          | 18               |           |              |
| T4SHAS4.A - T4SHAS4.C | Negative Ranks | 2 <sup>cm</sup>  | 1.50      | 3.00         |
|                       | Positive Ranks | 0 <sup>cn</sup>  | .00       | .00          |
|                       | Ties           | 16 <sup>co</sup> |           |              |
|                       | Total          | 18               |           |              |
| T5SHAS4.A - T5SHAS4.C | Negative Ranks | 2 <sup>cp</sup>  | 3.75      | 7.50         |
|                       | Positive Ranks | 3 <sup>cq</sup>  | 2.50      | 7.50         |
|                       | Ties           | 13 <sup>cr</sup> |           |              |
|                       | Total          | 18               |           |              |
| T6SHAS4.A - T6SHAS4.C | Negative Ranks | 4 <sup>cs</sup>  | 2.75      | 11.00        |
|                       | Positive Ranks | 1 <sup>ct</sup>  | 4.00      | 4.00         |
|                       | Ties           | 13 <sup>cu</sup> |           |              |
|                       | Total          | 18               |           |              |
| T7SHAS4.A - T7SHAS4.C | Negative Ranks | 4 <sup>cv</sup>  | 3.38      | 13.50        |
|                       | Positive Ranks | 1 <sup>cw</sup>  | 1.50      | 1.50         |
|                       | Ties           | 13 <sup>cx</sup> |           |              |
|                       | Total          | 18               |           |              |
| T8SHAS4.A - T8SHAS4.C | Negative Ranks | 1 <sup>cy</sup>  | 2.00      | 2.00         |
|                       | Positive Ranks | 3 <sup>cz</sup>  | 2.67      | 8.00         |
|                       | Ties           | 14 <sup>da</sup> |           |              |
|                       | Total          | 18               |           |              |
| T9SHAS4.A - T9SHAS4.C | Negative Ranks | 1 <sup>db</sup>  | 1.50      | 1.50         |
|                       | Positive Ranks | 2 <sup>dc</sup>  | 2.25      | 4.50         |

### Ranks

|                         |                | N                | Mean Rank | Sum of Ranks |
|-------------------------|----------------|------------------|-----------|--------------|
|                         | Ties           | 15 <sup>dd</sup> |           |              |
|                         | Total          | 18               |           |              |
| T10SHAS4.A - T10SHAS4.C | Negative Ranks | 1 <sup>de</sup>  | 1.00      | 1.00         |
|                         | Positive Ranks | 0 <sup>df</sup>  | .00       | .00          |
|                         | Ties           | 17 <sup>dg</sup> |           |              |
|                         | Total          | 18               |           |              |
| T11SHAS4.A - T11SHAS4.C | Negative Ranks | 1 <sup>dh</sup>  | 1.50      | 1.50         |
|                         | Positive Ranks | 1 <sup>di</sup>  | 1.50      | 1.50         |
|                         | Ties           | 15 <sup>dj</sup> |           |              |
|                         | Total          | 17               |           |              |
| T12SHAS4.A - T12SHAS4.C | Negative Ranks | 0 <sup>dk</sup>  | .00       | .00          |
|                         | Positive Ranks | 1 <sup>dl</sup>  | 1.00      | 1.00         |
|                         | Ties           | 15 <sup>dm</sup> |           |              |
|                         | Total          | 16               |           |              |

- a. T0SHAS4.B < T0SHAS4.A
- b. T0SHAS4.B > T0SHAS4.A
- c. T0SHAS4.B = T0SHAS4.A
- d. T1SHAS4.B < T1SHAS4.A
- e. T1SHAS4.B > T1SHAS4.A
- f. T1SHAS4.B = T1SHAS4.A
- g. T2SHAS4.B < T2SHAS4.A
- h. T2SHAS4.B > T2SHAS4.A
- i. T2SHAS4.B = T2SHAS4.A
- j. T3SHAS4.B < T3SHAS4.A
- k. T3SHAS4.B > T3SHAS4.A
- l. T3SHAS4.B = T3SHAS4.A
- m. T4SHAS4.B < T4SHAS4.A
- n. T4SHAS4.B > T4SHAS4.A
- o. T4SHAS4.B = T4SHAS4.A
- p. T4SHAS4.B = T4SHAS4.A

p. T5SHAS4.B < T5SHAS4.A  
q. T5SHAS4.B > T5SHAS4.A  
r. T5SHAS4.B = T5SHAS4.A  
s. T6SHAS4.B < T6SHAS4.A  
t. T6SHAS4.B > T6SHAS4.A  
u. T6SHAS4.B = T6SHAS4.A  
v. T7SHAS4.B < T7SHAS4.A  
w. T7SHAS4.B > T7SHAS4.A  
x. T7SHAS4.B = T7SHAS4.A  
y. T8SHAS4.B < T8SHAS4.A  
z. T8SHAS4.B > T8SHAS4.A  
aa. T8SHAS4.B = T8SHAS4.A  
ab. T9SHAS4.B < T9SHAS4.A  
ac. T9SHAS4.B > T9SHAS4.A  
ad. T9SHAS4.B = T9SHAS4.A  
ae. T10SHAS4.B < T10SHAS4.A  
af. T10SHAS4.B > T10SHAS4.A  
ag. T10SHAS4.B = T10SHAS4.A  
ah. T11SHAS4.B < T11SHAS4.A  
ai. T11SHAS4.B > T11SHAS4.A  
aj. T11SHAS4.B = T11SHAS4.A  
ak. T12SHAS4.B < T12SHAS4.A  
al. T12SHAS4.B > T12SHAS4.A  
am. T12SHAS4.B = T12SHAS4.A  
an. T0SHAS4.C < T0SHAS4.B  
ao. T0SHAS4.C > T0SHAS4.B  
ap. T0SHAS4.C = T0SHAS4.B  
aq. T1SHAS4.C < T1SHAS4.B  
ar. T1SHAS4.C > T1SHAS4.B  
as. T1SHAS4.C = T1SHAS4.B  
at. T2SHAS4.C < T2SHAS4.B  
au. T2SHAS4.C > T2SHAS4.B  
av. T2SHAS4.C = T2SHAS4.B  
aw. T3SHAS4.C < T3SHAS4.B  
ax. T3SHAS4.C > T3SHAS4.B  
ay. T3SHAS4.C = T3SHAS4.B  
az. T4SHAS4.C < T4SHAS4.B  
ba. T4SHAS4.C > T4SHAS4.B  
bb. T4SHAS4.C = T4SHAS4.B  
bc. T5SHAS4.C < T5SHAS4.B  
bd. T5SHAS4.C > T5SHAS4.B  
be. T5SHAS4.C = T5SHAS4.B  
bf. T6SHAS4.C < T6SHAS4.B  
bg. T6SHAS4.C > T6SHAS4.B  
bh. T6SHAS4.C = T6SHAS4.B

bh. T6SHAS4.C = T6SHAS4.B  
bi. T7SHAS4.C < T7SHAS4.B  
bj. T7SHAS4.C > T7SHAS4.B  
bk. T7SHAS4.C = T7SHAS4.B  
bl. T8SHAS4.C < T8SHAS4.B  
bm. T8SHAS4.C > T8SHAS4.B  
bn. T8SHAS4.C = T8SHAS4.B  
bo. T9SHAS4.C < T9SHAS4.B  
bp. T9SHAS4.C > T9SHAS4.B  
bq. T9SHAS4.C = T9SHAS4.B  
br. T10SHAS4.C < T10SHAS4.B  
bs. T10SHAS4.C > T10SHAS4.B  
bt. T10SHAS4.C = T10SHAS4.B  
bu. T11SHAS4.C < T11SHAS4.B  
bv. T11SHAS4.C > T11SHAS4.B  
bw. T11SHAS4.C = T11SHAS4.B  
bx. T12SHAS4.C < T12SHAS4.B  
by. T12SHAS4.C > T12SHAS4.B  
bz. T12SHAS4.C = T12SHAS4.B  
ca. T0SHAS4.A < T0SHAS4.C  
cb. T0SHAS4.A > T0SHAS4.C  
cc. T0SHAS4.A = T0SHAS4.C  
cd. T1SHAS4.A < T1SHAS4.C  
ce. T1SHAS4.A > T1SHAS4.C  
cf. T1SHAS4.A = T1SHAS4.C  
cg. T2SHAS4.A < T2SHAS4.C  
ch. T2SHAS4.A > T2SHAS4.C  
ci. T2SHAS4.A = T2SHAS4.C  
cj. T3SHAS4.A < T3SHAS4.C  
ck. T3SHAS4.A > T3SHAS4.C  
cl. T3SHAS4.A = T3SHAS4.C  
cm. T4SHAS4.A < T4SHAS4.C  
cn. T4SHAS4.A > T4SHAS4.C  
co. T4SHAS4.A = T4SHAS4.C  
cp. T5SHAS4.A < T5SHAS4.C  
cq. T5SHAS4.A > T5SHAS4.C  
cr. T5SHAS4.A = T5SHAS4.C  
cs. T6SHAS4.A < T6SHAS4.C  
ct. T6SHAS4.A > T6SHAS4.C  
cu. T6SHAS4.A = T6SHAS4.C  
cv. T7SHAS4.A < T7SHAS4.C  
cw. T7SHAS4.A > T7SHAS4.C  
cx. T7SHAS4.A = T7SHAS4.C  
cy. T8SHAS4.A < T8SHAS4.C  
-- T8SHAS4.A = T8SHAS4.C

- cz. T8SHAS4.A > T8SHAS4.C
- da. T8SHAS4.A = T8SHAS4.C
- db. T9SHAS4.A < T9SHAS4.C
- dc. T9SHAS4.A > T9SHAS4.C
- dd. T9SHAS4.A = T9SHAS4.C
- de. T10SHAS4.A < T10SHAS4.C
- df. T10SHAS4.A > T10SHAS4.C
- dg. T10SHAS4.A = T10SHAS4.C
- dh. T11SHAS4.A < T11SHAS4.C
- di. T11SHAS4.A > T11SHAS4.C
- dj. T11SHAS4.A = T11SHAS4.C
- dk. T12SHAS4.A < T12SHAS4.C
- dl. T12SHAS4.A > T12SHAS4.C
- dm. T12SHAS4.A = T12SHAS4.C

**Test Statistics<sup>a</sup>**

|                        | T0SHAS4.B -<br>T0SHAS4.A | T1SHAS4.B -<br>T1SHAS4.A | T2SHAS4.B -<br>T2SHAS4.A | T3SHAS4.B -<br>T3SHAS4.A |
|------------------------|--------------------------|--------------------------|--------------------------|--------------------------|
| Z                      | .000 <sup>b</sup>        | .000 <sup>b</sup>        | -1.000 <sup>c</sup>      | .000 <sup>b</sup>        |
| Asymp. Sig. (2-tailed) | 1.000                    | 1.000                    | .317                     | 1.000                    |

**Test Statistics<sup>a</sup>**

|                        | T4SHAS4.B -<br>T4SHAS4.A | T5SHAS4.B -<br>T5SHAS4.A | T6SHAS4.B -<br>T6SHAS4.A | T7SHAS4.B -<br>T7SHAS4.A |
|------------------------|--------------------------|--------------------------|--------------------------|--------------------------|
| Z                      | -1.000 <sup>c</sup>      | -1.890 <sup>c</sup>      | -1.342 <sup>c</sup>      | -.736 <sup>c</sup>       |
| Asymp. Sig. (2-tailed) | .317                     | .059                     | .180                     | .461                     |

**Test Statistics<sup>a</sup>**

|                        | T8SHAS4.B -<br>T8SHAS4.A | T9SHAS4.B -<br>T9SHAS4.A | T10SHAS4.B -<br>T10SHAS4.A | T11SHAS4.B -<br>T11SHAS4.A |
|------------------------|--------------------------|--------------------------|----------------------------|----------------------------|
| Z                      | -1.983 <sup>c</sup>      | -1.841 <sup>c</sup>      | -1.000 <sup>c</sup>        | -.816 <sup>c</sup>         |
| Asymp. Sig. (2-tailed) | .047                     | .066                     | .317                       | .414                       |

**Test Statistics<sup>a</sup>**

|                        | T12SHAS4.B -<br>T12SHAS4.A | T0SHAS4.C -<br>T0SHAS4.B | T1SHAS4.C -<br>T1SHAS4.B | T2SHAS4.C -<br>T2SHAS4.B |
|------------------------|----------------------------|--------------------------|--------------------------|--------------------------|
| Z                      | -1.342 <sup>c</sup>        | -1.000 <sup>d</sup>      | .000 <sup>b</sup>        | .000 <sup>b</sup>        |
| Asymp. Sig. (2-tailed) | .180                       | .317                     | 1.000                    | 1.000                    |

**Test Statistics<sup>a</sup>**

|                        | T3SHAS4.C -<br>T3SHAS4.B | T4SHAS4.C -<br>T4SHAS4.B | T5SHAS4.C -<br>T5SHAS4.B | T6SHAS4.C -<br>T6SHAS4.B |
|------------------------|--------------------------|--------------------------|--------------------------|--------------------------|
| Z                      | -1.000 <sup>d</sup>      | -1.342 <sup>d</sup>      | -1.069 <sup>d</sup>      | -1.890 <sup>d</sup>      |
| Asymp. Sig. (2-tailed) | .317                     | .180                     | .285                     | .059                     |

**Test Statistics<sup>a</sup>**

|                        | T7SHAS4.C - T7SHAS4.B | T8SHAS4.C - T8SHAS4.B | T9SHAS4.C - T9SHAS4.B | T10SHAS4.C - T10SHAS4.B |
|------------------------|-----------------------|-----------------------|-----------------------|-------------------------|
| Z                      | -1.561 <sup>d</sup>   | -1.342 <sup>d</sup>   | -1.414 <sup>d</sup>   | -1.000 <sup>d</sup>     |
| Asymp. Sig. (2-tailed) | .119                  | .180                  | .157                  | .317                    |

**Test Statistics<sup>a</sup>**

|                        | T11SHAS4.C - T11SHAS4.B | T12SHAS4.C - T12SHAS4.B | T0SHAS4.A - T0SHAS4.C | T1SHAS4.A - T1SHAS4.C |
|------------------------|-------------------------|-------------------------|-----------------------|-----------------------|
| Z                      | .000 <sup>b</sup>       | .000 <sup>b</sup>       | -1.000 <sup>c</sup>   | .000 <sup>b</sup>     |
| Asymp. Sig. (2-tailed) | 1.000                   | 1.000                   | .317                  | 1.000                 |

**Test Statistics<sup>a</sup>**

|                        | T2SHAS4.A - T2SHAS4.C | T3SHAS4.A - T3SHAS4.C | T4SHAS4.A - T4SHAS4.C | T5SHAS4.A - T5SHAS4.C |
|------------------------|-----------------------|-----------------------|-----------------------|-----------------------|
| Z                      | -1.000 <sup>d</sup>   | -1.000 <sup>c</sup>   | -1.414 <sup>c</sup>   | .000 <sup>b</sup>     |
| Asymp. Sig. (2-tailed) | .317                  | .317                  | .157                  | 1.000                 |

**Test Statistics<sup>a</sup>**

|                        | T6SHAS4.A - T6SHAS4.C | T7SHAS4.A - T7SHAS4.C | T8SHAS4.A - T8SHAS4.C | T9SHAS4.A - T9SHAS4.C |
|------------------------|-----------------------|-----------------------|-----------------------|-----------------------|
| Z                      | -.962 <sup>c</sup>    | -1.656 <sup>c</sup>   | -1.134 <sup>d</sup>   | -.816 <sup>d</sup>    |
| Asymp. Sig. (2-tailed) | .336                  | .098                  | .257                  | .414                  |

**Test Statistics<sup>a</sup>**

|                        | T10SHAS4.A - T10SHAS4.C | T11SHAS4.A - T11SHAS4.C | T12SHAS4.A - T12SHAS4.C |
|------------------------|-------------------------|-------------------------|-------------------------|
| Z                      | -1.000 <sup>c</sup>     | .000 <sup>b</sup>       | -1.000 <sup>d</sup>     |
| Asymp. Sig. (2-tailed) | .317                    | 1.000                   | .317                    |

a. Wilcoxon Signed Ranks Test

b. The sum of negative ranks equals the sum of positive ranks.

c. Based on positive ranks.

d. Based on negative ranks.

**NPar Tests**

### Notes

|                               |                                       |                                                                                                               |
|-------------------------------|---------------------------------------|---------------------------------------------------------------------------------------------------------------|
| <b>Output Created</b>         |                                       | <b>05-MAR-2025 21:25:35</b>                                                                                   |
| <b>Comments</b>               |                                       |                                                                                                               |
| <b>Input</b>                  | <b>Data</b>                           | <b>/Users/dicec004/My Drive/WANA stuff/WANA Merged Data.sav</b>                                               |
|                               | <b>Active Dataset</b>                 | <b>DataSet1</b>                                                                                               |
|                               | <b>Filter</b>                         | <b>&lt;none&gt;</b>                                                                                           |
|                               | <b>Weight</b>                         | <b>&lt;none&gt;</b>                                                                                           |
|                               | <b>Split File</b>                     | <b>&lt;none&gt;</b>                                                                                           |
|                               | <b>N of Rows in Working Data File</b> | <b>20</b>                                                                                                     |
| <b>Missing Value Handling</b> | <b>Definition of Missing</b>          | <b>User-defined missing values are treated as missing.</b>                                                    |
|                               | <b>Cases Used</b>                     | <b>Statistics for each test are based on all cases with valid data for the variable(s) used in that test.</b> |

## Notes

### Syntax

```
NPART TESTS
/WILCOXON=T0SHAS5.
A T1SHAS5.A T2SHAS5.A
T3SHAS5.A T4SHAS5.A
T5SHAS5.A T6SHAS5.A
T7SHAS5.A T8SHAS5.A
T9SHAS5.A T10SHAS5.A
T11SHAS5.A
T12SHAS5.A
T0SHAS5.B T1SHAS5.
B T2SHAS5.B T3SHAS5.B
T4SHAS5.B T5SHAS5.B
T6SHAS5.B T7SHAS5.B
T8SHAS5.B T9SHAS5.B
T10SHAS5.B
T11SHAS5.B
T12SHAS5.B
T0SHAS5.C T1SHAS5.
C T2SHAS5.C T3SHAS5.C
T4SHAS5.C T5SHAS5.C
T6SHAS5.C T7SHAS5.C
T8SHAS5.C T9SHAS5.C
T10SHAS5.C
T11SHAS5.C
T12SHAS5.C
WITH
T0SHAS5.B T1SHAS5.
B T2SHAS5.B T3SHAS5.B
T4SHAS5.B T5SHAS5.B
T6SHAS5.B T7SHAS5.B
T8SHAS5.B T9SHAS5.B
T10SHAS5.B
T11SHAS5.B
T12SHAS5.B
T0SHAS5.C T1SHAS5.
C T2SHAS5.C T3SHAS5.C
T4SHAS5.C T5SHAS5.C
T6SHAS5.C T7SHAS5.C
T8SHAS5.C T9SHAS5.C
T10SHAS5.C
T11SHAS5.C
T12SHAS5.C
T0SHAS5.A T1SHAS5.
A T2SHAS5.A T3SHAS5.A
T4SHAS5.A T5SHAS5.A
T6SHAS5.A T7SHAS5.A
T8SHAS5.A T9SHAS5.A
T10SHAS5.A
T11SHAS5.A
T12SHAS5.A (PAIRED)
/STATISTICS
DESCRIPTIVES
/MISSING ANALYSIS.
```

### Notes

|           |                                      |             |
|-----------|--------------------------------------|-------------|
| Resources | Processor Time                       | 00:00:00.06 |
|           | Elapsed Time                         | 00:00:00.00 |
|           | Number of Cases Allowed <sup>a</sup> | 71493       |

a. Based on availability of workspace memory.

### Descriptive Statistics

|            | N  | Mean | Std. Deviation | Minimum | Maximum |
|------------|----|------|----------------|---------|---------|
| T0SHAS5.A  | 19 | 1.00 | .000           | 1       | 1       |
| T1SHAS5.A  | 16 | 1.13 | .500           | 1       | 3       |
| T2SHAS5.A  | 17 | 1.06 | .243           | 1       | 2       |
| T3SHAS5.A  | 19 | 1.05 | .229           | 1       | 2       |
| T4SHAS5.A  | 19 | 1.16 | .501           | 1       | 3       |
| T5SHAS5.A  | 19 | 1.37 | .684           | 1       | 3       |
| T6SHAS5.A  | 19 | 1.26 | .733           | 1       | 4       |
| T7SHAS5.A  | 19 | 1.47 | .905           | 1       | 4       |
| T8SHAS5.A  | 19 | 1.21 | .535           | 1       | 3       |
| T9SHAS5.A  | 19 | 1.16 | .501           | 1       | 3       |
| T10SHAS5.A | 19 | 1.16 | .501           | 1       | 3       |
| T11SHAS5.A | 19 | 1.05 | .229           | 1       | 2       |
| T12SHAS5.A | 18 | 1.06 | .236           | 1       | 2       |
| T0SHAS5.B  | 19 | 1.00 | .000           | 1       | 1       |
| T1SHAS5.B  | 18 | 1.00 | .000           | 1       | 1       |
| T2SHAS5.B  | 19 | 1.00 | .000           | 1       | 1       |
| T3SHAS5.B  | 19 | 1.00 | .000           | 1       | 1       |
| T4SHAS5.B  | 19 | 1.05 | .229           | 1       | 2       |
| T5SHAS5.B  | 19 | 1.00 | .000           | 1       | 1       |
| T6SHAS5.B  | 19 | 1.00 | .000           | 1       | 1       |
| T7SHAS5.B  | 19 | 1.00 | .000           | 1       | 1       |
| T8SHAS5.B  | 18 | 1.00 | .000           | 1       | 1       |
| T9SHAS5.B  | 19 | 1.00 | .000           | 1       | 1       |
| T10SHAS5.B | 19 | 1.00 | .000           | 1       | 1       |
| T11SHAS5.B | 18 | 1.00 | .000           | 1       | 1       |
| T12SHAS5.B | 17 | 1.00 | .000           | 1       | 1       |
| T0SHAS5.C  | 18 | 1.00 | .000           | 1       | 1       |
| T1SHAS5.C  | 18 | 1.00 | .000           | 1       | 1       |
| T2SHAS5.C  | 17 | 1.00 | .000           | 1       | 1       |
| T3SHAS5.C  | 18 | 1.11 | .323           | 1       | 2       |
| T4SHAS5.C  | 18 | 1.11 | .323           | 1       | 2       |
| T5SHAS5.C  | 18 | 1.28 | .461           | 1       | 2       |
| T6SHAS5.C  | 18 | 1.11 | .323           | 1       | 2       |

### Descriptive Statistics

|            | N  | Mean | Std. Deviation | Minimum | Maximum |
|------------|----|------|----------------|---------|---------|
| T7SHAS5.C  | 18 | 1.11 | .323           | 1       | 2       |
| T8SHAS5.C  | 18 | 1.00 | .000           | 1       | 1       |
| T9SHAS5.C  | 18 | 1.00 | .000           | 1       | 1       |
| T10SHAS5.C | 18 | 1.00 | .000           | 1       | 1       |
| T11SHAS5.C | 17 | 1.00 | .000           | 1       | 1       |
| T12SHAS5.C | 17 | 1.00 | .000           | 1       | 1       |

### Wilcoxon Signed Ranks Test

#### Ranks

|                       |                | N               | Mean Rank | Sum of Ranks |
|-----------------------|----------------|-----------------|-----------|--------------|
| T0SHAS5.B - T0SHAS5.A | Negative Ranks | 0 <sup>a</sup>  | .00       | .00          |
|                       | Positive Ranks | 0 <sup>b</sup>  | .00       | .00          |
|                       | Ties           | 19 <sup>c</sup> |           |              |
|                       | Total          | 19              |           |              |
| T1SHAS5.B - T1SHAS5.A | Negative Ranks | 1 <sup>d</sup>  | 1.00      | 1.00         |
|                       | Positive Ranks | 0 <sup>e</sup>  | .00       | .00          |
|                       | Ties           | 14 <sup>f</sup> |           |              |
|                       | Total          | 15              |           |              |
| T2SHAS5.B - T2SHAS5.A | Negative Ranks | 1 <sup>g</sup>  | 1.00      | 1.00         |
|                       | Positive Ranks | 0 <sup>h</sup>  | .00       | .00          |
|                       | Ties           | 16 <sup>i</sup> |           |              |
|                       | Total          | 17              |           |              |
| T3SHAS5.B - T3SHAS5.A | Negative Ranks | 1 <sup>j</sup>  | 1.00      | 1.00         |
|                       | Positive Ranks | 0 <sup>k</sup>  | .00       | .00          |
|                       | Ties           | 18 <sup>l</sup> |           |              |
|                       | Total          | 19              |           |              |
| T4SHAS5.B - T4SHAS5.A | Negative Ranks | 2 <sup>m</sup>  | 2.25      | 4.50         |
|                       | Positive Ranks | 1 <sup>n</sup>  | 1.50      | 1.50         |
|                       | Ties           | 16 <sup>o</sup> |           |              |
|                       | Total          | 19              |           |              |
| T5SHAS5.B - T5SHAS5.A | Negative Ranks | 5 <sup>p</sup>  | 3.00      | 15.00        |
|                       | Positive Ranks | 0 <sup>q</sup>  | .00       | .00          |
|                       | Ties           | 14 <sup>r</sup> |           |              |
|                       | Total          | 19              |           |              |
| T6SHAS5.B - T6SHAS5.A | Negative Ranks | 3 <sup>s</sup>  | 2.00      | 6.00         |
|                       | Positive Ranks | 0 <sup>t</sup>  | .00       | .00          |
|                       | Ties           | 16 <sup>u</sup> |           |              |
|                       | Total          | 19              |           |              |

### Ranks

|                         |                | N                | Mean Rank | Sum of Ranks |
|-------------------------|----------------|------------------|-----------|--------------|
| T7SHAS5.B - T7SHAS5.A   | Negative Ranks | 5 <sup>v</sup>   | 3.00      | 15.00        |
|                         | Positive Ranks | 0 <sup>w</sup>   | .00       | .00          |
|                         | Ties           | 14 <sup>x</sup>  |           |              |
|                         | Total          | 19               |           |              |
| T8SHAS5.B - T8SHAS5.A   | Negative Ranks | 3 <sup>y</sup>   | 2.00      | 6.00         |
|                         | Positive Ranks | 0 <sup>z</sup>   | .00       | .00          |
|                         | Ties           | 15 <sup>aa</sup> |           |              |
|                         | Total          | 18               |           |              |
| T9SHAS5.B - T9SHAS5.A   | Negative Ranks | 2 <sup>ab</sup>  | 1.50      | 3.00         |
|                         | Positive Ranks | 0 <sup>ac</sup>  | .00       | .00          |
|                         | Ties           | 17 <sup>ad</sup> |           |              |
|                         | Total          | 19               |           |              |
| T10SHAS5.B - T10SHAS5.A | Negative Ranks | 2 <sup>ae</sup>  | 1.50      | 3.00         |
|                         | Positive Ranks | 0 <sup>af</sup>  | .00       | .00          |
|                         | Ties           | 17 <sup>ag</sup> |           |              |
|                         | Total          | 19               |           |              |
| T11SHAS5.B - T11SHAS5.A | Negative Ranks | 1 <sup>ah</sup>  | 1.00      | 1.00         |
|                         | Positive Ranks | 0 <sup>ai</sup>  | .00       | .00          |
|                         | Ties           | 17 <sup>aj</sup> |           |              |
|                         | Total          | 18               |           |              |
| T12SHAS5.B - T12SHAS5.A | Negative Ranks | 1 <sup>ak</sup>  | 1.00      | 1.00         |
|                         | Positive Ranks | 0 <sup>al</sup>  | .00       | .00          |
|                         | Ties           | 15 <sup>am</sup> |           |              |
|                         | Total          | 16               |           |              |
| T0SHAS5.C - T0SHAS5.B   | Negative Ranks | 0 <sup>an</sup>  | .00       | .00          |
|                         | Positive Ranks | 0 <sup>ao</sup>  | .00       | .00          |
|                         | Ties           | 18 <sup>ap</sup> |           |              |
|                         | Total          | 18               |           |              |
| T1SHAS5.C - T1SHAS5.B   | Negative Ranks | 0 <sup>aq</sup>  | .00       | .00          |
|                         | Positive Ranks | 0 <sup>ar</sup>  | .00       | .00          |
|                         | Ties           | 17 <sup>as</sup> |           |              |
|                         | Total          | 17               |           |              |
| T2SHAS5.C - T2SHAS5.B   | Negative Ranks | 0 <sup>at</sup>  | .00       | .00          |
|                         | Positive Ranks | 0 <sup>au</sup>  | .00       | .00          |
|                         | Ties           | 17 <sup>av</sup> |           |              |
|                         | Total          | 17               |           |              |
| T3SHAS5.C - T3SHAS5.B   | Negative Ranks | 0 <sup>aw</sup>  | .00       | .00          |
|                         | Positive Ranks | 2 <sup>ax</sup>  | 1.50      | 3.00         |

### Ranks

|                         |                | N                | Mean Rank | Sum of Ranks |
|-------------------------|----------------|------------------|-----------|--------------|
|                         | Ties           | 16 <sup>ay</sup> |           |              |
|                         | Total          | 18               |           |              |
| T4SHAS5.C - T4SHAS5.B   | Negative Ranks | 1 <sup>az</sup>  | 2.00      | 2.00         |
|                         | Positive Ranks | 2 <sup>ba</sup>  | 2.00      | 4.00         |
|                         | Ties           | 15 <sup>bb</sup> |           |              |
|                         | Total          | 18               |           |              |
|                         |                |                  |           |              |
| T5SHAS5.C - T5SHAS5.B   | Negative Ranks | 0 <sup>bc</sup>  | .00       | .00          |
|                         | Positive Ranks | 5 <sup>bd</sup>  | 3.00      | 15.00        |
|                         | Ties           | 13 <sup>be</sup> |           |              |
|                         | Total          | 18               |           |              |
| T6SHAS5.C - T6SHAS5.B   | Negative Ranks | 0 <sup>bf</sup>  | .00       | .00          |
|                         | Positive Ranks | 2 <sup>bg</sup>  | 1.50      | 3.00         |
|                         | Ties           | 16 <sup>bh</sup> |           |              |
|                         | Total          | 18               |           |              |
| T7SHAS5.C - T7SHAS5.B   | Negative Ranks | 0 <sup>bi</sup>  | .00       | .00          |
|                         | Positive Ranks | 2 <sup>bj</sup>  | 1.50      | 3.00         |
|                         | Ties           | 16 <sup>bk</sup> |           |              |
|                         | Total          | 18               |           |              |
| T8SHAS5.C - T8SHAS5.B   | Negative Ranks | 0 <sup>bl</sup>  | .00       | .00          |
|                         | Positive Ranks | 0 <sup>bm</sup>  | .00       | .00          |
|                         | Ties           | 17 <sup>bn</sup> |           |              |
|                         | Total          | 17               |           |              |
| T9SHAS5.C - T9SHAS5.B   | Negative Ranks | 0 <sup>bo</sup>  | .00       | .00          |
|                         | Positive Ranks | 0 <sup>bp</sup>  | .00       | .00          |
|                         | Ties           | 18 <sup>bq</sup> |           |              |
|                         | Total          | 18               |           |              |
| T10SHAS5.C - T10SHAS5.B | Negative Ranks | 0 <sup>br</sup>  | .00       | .00          |
|                         | Positive Ranks | 0 <sup>bs</sup>  | .00       | .00          |
|                         | Ties           | 18 <sup>bt</sup> |           |              |
|                         | Total          | 18               |           |              |
| T11SHAS5.C - T11SHAS5.B | Negative Ranks | 0 <sup>bu</sup>  | .00       | .00          |
|                         | Positive Ranks | 0 <sup>bv</sup>  | .00       | .00          |
|                         | Ties           | 16 <sup>bw</sup> |           |              |
|                         | Total          | 16               |           |              |
| T12SHAS5.C - T12SHAS5.B | Negative Ranks | 0 <sup>bx</sup>  | .00       | .00          |
|                         | Positive Ranks | 0 <sup>by</sup>  | .00       | .00          |
|                         | Ties           | 15 <sup>bz</sup> |           |              |
|                         | Total          | 15               |           |              |

### Ranks

|                       |                | N                | Mean Rank | Sum of Ranks |
|-----------------------|----------------|------------------|-----------|--------------|
| T0SHAS5.A - T0SHAS5.C | Negative Ranks | 0 <sup>ca</sup>  | .00       | .00          |
|                       | Positive Ranks | 0 <sup>cb</sup>  | .00       | .00          |
|                       | Ties           | 18 <sup>cc</sup> |           |              |
|                       | Total          | 18               |           |              |
| T1SHAS5.A - T1SHAS5.C | Negative Ranks | 0 <sup>cd</sup>  | .00       | .00          |
|                       | Positive Ranks | 1 <sup>ce</sup>  | 1.00      | 1.00         |
|                       | Ties           | 15 <sup>cf</sup> |           |              |
|                       | Total          | 16               |           |              |
| T2SHAS5.A - T2SHAS5.C | Negative Ranks | 0 <sup>cg</sup>  | .00       | .00          |
|                       | Positive Ranks | 1 <sup>ch</sup>  | 1.00      | 1.00         |
|                       | Ties           | 15 <sup>ci</sup> |           |              |
|                       | Total          | 16               |           |              |
| T3SHAS5.A - T3SHAS5.C | Negative Ranks | 2 <sup>cj</sup>  | 2.00      | 4.00         |
|                       | Positive Ranks | 1 <sup>ck</sup>  | 2.00      | 2.00         |
|                       | Ties           | 15 <sup>cl</sup> |           |              |
|                       | Total          | 18               |           |              |
| T4SHAS5.A - T4SHAS5.C | Negative Ranks | 2 <sup>cm</sup>  | 2.00      | 4.00         |
|                       | Positive Ranks | 2 <sup>cn</sup>  | 3.00      | 6.00         |
|                       | Ties           | 14 <sup>co</sup> |           |              |
|                       | Total          | 18               |           |              |
| T5SHAS5.A - T5SHAS5.C | Negative Ranks | 2 <sup>cp</sup>  | 2.00      | 4.00         |
|                       | Positive Ranks | 2 <sup>cq</sup>  | 3.00      | 6.00         |
|                       | Ties           | 14 <sup>cr</sup> |           |              |
|                       | Total          | 18               |           |              |
| T6SHAS5.A - T6SHAS5.C | Negative Ranks | 2 <sup>cs</sup>  | 2.50      | 5.00         |
|                       | Positive Ranks | 2 <sup>ct</sup>  | 2.50      | 5.00         |
|                       | Ties           | 14 <sup>cu</sup> |           |              |
|                       | Total          | 18               |           |              |
| T7SHAS5.A - T7SHAS5.C | Negative Ranks | 1 <sup>cv</sup>  | 1.50      | 1.50         |
|                       | Positive Ranks | 3 <sup>cw</sup>  | 2.83      | 8.50         |
|                       | Ties           | 14 <sup>cx</sup> |           |              |
|                       | Total          | 18               |           |              |
| T8SHAS5.A - T8SHAS5.C | Negative Ranks | 0 <sup>cy</sup>  | .00       | .00          |
|                       | Positive Ranks | 2 <sup>cz</sup>  | 1.50      | 3.00         |
|                       | Ties           | 16 <sup>da</sup> |           |              |
|                       | Total          | 18               |           |              |
| T9SHAS5.A - T9SHAS5.C | Negative Ranks | 0 <sup>db</sup>  | .00       | .00          |
|                       | Positive Ranks | 1 <sup>dc</sup>  | 1.00      | 1.00         |

### Ranks

|                         |                | N                | Mean Rank | Sum of Ranks |
|-------------------------|----------------|------------------|-----------|--------------|
|                         | Ties           | 17 <sup>dd</sup> |           |              |
|                         | Total          | 18               |           |              |
| T10SHAS5.A - T10SHAS5.C | Negative Ranks | 0 <sup>de</sup>  | .00       | .00          |
|                         | Positive Ranks | 1 <sup>df</sup>  | 1.00      | 1.00         |
|                         | Ties           | 17 <sup>dg</sup> |           |              |
|                         | Total          | 18               |           |              |
| T11SHAS5.A - T11SHAS5.C | Negative Ranks | 0 <sup>dh</sup>  | .00       | .00          |
|                         | Positive Ranks | 0 <sup>di</sup>  | .00       | .00          |
|                         | Ties           | 17 <sup>dj</sup> |           |              |
|                         | Total          | 17               |           |              |
| T12SHAS5.A - T12SHAS5.C | Negative Ranks | 0 <sup>dk</sup>  | .00       | .00          |
|                         | Positive Ranks | 0 <sup>dl</sup>  | .00       | .00          |
|                         | Ties           | 16 <sup>dm</sup> |           |              |
|                         | Total          | 16               |           |              |

- a. T0SHAS5.B < T0SHAS5.A
- b. T0SHAS5.B > T0SHAS5.A
- c. T0SHAS5.B = T0SHAS5.A
- d. T1SHAS5.B < T1SHAS5.A
- e. T1SHAS5.B > T1SHAS5.A
- f. T1SHAS5.B = T1SHAS5.A
- g. T2SHAS5.B < T2SHAS5.A
- h. T2SHAS5.B > T2SHAS5.A
- i. T2SHAS5.B = T2SHAS5.A
- j. T3SHAS5.B < T3SHAS5.A
- k. T3SHAS5.B > T3SHAS5.A
- l. T3SHAS5.B = T3SHAS5.A
- m. T4SHAS5.B < T4SHAS5.A
- n. T4SHAS5.B > T4SHAS5.A
- o. T4SHAS5.B = T4SHAS5.A
- p. T5SHAS5.B < T5SHAS5.A

p. T5SHAS5.B < T5SHAS5.A  
q. T5SHAS5.B > T5SHAS5.A  
r. T5SHAS5.B = T5SHAS5.A  
s. T6SHAS5.B < T6SHAS5.A  
t. T6SHAS5.B > T6SHAS5.A  
u. T6SHAS5.B = T6SHAS5.A  
v. T7SHAS5.B < T7SHAS5.A  
w. T7SHAS5.B > T7SHAS5.A  
x. T7SHAS5.B = T7SHAS5.A  
y. T8SHAS5.B < T8SHAS5.A  
z. T8SHAS5.B > T8SHAS5.A  
aa. T8SHAS5.B = T8SHAS5.A  
ab. T9SHAS5.B < T9SHAS5.A  
ac. T9SHAS5.B > T9SHAS5.A  
ad. T9SHAS5.B = T9SHAS5.A  
ae. T10SHAS5.B < T10SHAS5.A  
af. T10SHAS5.B > T10SHAS5.A  
ag. T10SHAS5.B = T10SHAS5.A  
ah. T11SHAS5.B < T11SHAS5.A  
ai. T11SHAS5.B > T11SHAS5.A  
aj. T11SHAS5.B = T11SHAS5.A  
ak. T12SHAS5.B < T12SHAS5.A  
al. T12SHAS5.B > T12SHAS5.A  
am. T12SHAS5.B = T12SHAS5.A  
an. T0SHAS5.C < T0SHAS5.B  
ao. T0SHAS5.C > T0SHAS5.B  
ap. T0SHAS5.C = T0SHAS5.B  
aq. T1SHAS5.C < T1SHAS5.B  
ar. T1SHAS5.C > T1SHAS5.B  
as. T1SHAS5.C = T1SHAS5.B  
at. T2SHAS5.C < T2SHAS5.B  
au. T2SHAS5.C > T2SHAS5.B  
av. T2SHAS5.C = T2SHAS5.B  
aw. T3SHAS5.C < T3SHAS5.B  
ax. T3SHAS5.C > T3SHAS5.B  
ay. T3SHAS5.C = T3SHAS5.B  
az. T4SHAS5.C < T4SHAS5.B  
ba. T4SHAS5.C > T4SHAS5.B  
bb. T4SHAS5.C = T4SHAS5.B  
bc. T5SHAS5.C < T5SHAS5.B  
bd. T5SHAS5.C > T5SHAS5.B  
be. T5SHAS5.C = T5SHAS5.B  
bf. T6SHAS5.C < T6SHAS5.B  
bg. T6SHAS5.C > T6SHAS5.B  
bh. T6SHAS5.C = T6SHAS5.B

bh. T6SHAS5.C = T6SHAS5.B  
bi. T7SHAS5.C < T7SHAS5.B  
bj. T7SHAS5.C > T7SHAS5.B  
bk. T7SHAS5.C = T7SHAS5.B  
bl. T8SHAS5.C < T8SHAS5.B  
bm. T8SHAS5.C > T8SHAS5.B  
bn. T8SHAS5.C = T8SHAS5.B  
bo. T9SHAS5.C < T9SHAS5.B  
bp. T9SHAS5.C > T9SHAS5.B  
bq. T9SHAS5.C = T9SHAS5.B  
br. T10SHAS5.C < T10SHAS5.B  
bs. T10SHAS5.C > T10SHAS5.B  
bt. T10SHAS5.C = T10SHAS5.B  
bu. T11SHAS5.C < T11SHAS5.B  
bv. T11SHAS5.C > T11SHAS5.B  
bw. T11SHAS5.C = T11SHAS5.B  
bx. T12SHAS5.C < T12SHAS5.B  
by. T12SHAS5.C > T12SHAS5.B  
bz. T12SHAS5.C = T12SHAS5.B  
ca. T0SHAS5.A < T0SHAS5.C  
cb. T0SHAS5.A > T0SHAS5.C  
cc. T0SHAS5.A = T0SHAS5.C  
cd. T1SHAS5.A < T1SHAS5.C  
ce. T1SHAS5.A > T1SHAS5.C  
cf. T1SHAS5.A = T1SHAS5.C  
cg. T2SHAS5.A < T2SHAS5.C  
ch. T2SHAS5.A > T2SHAS5.C  
ci. T2SHAS5.A = T2SHAS5.C  
cj. T3SHAS5.A < T3SHAS5.C  
ck. T3SHAS5.A > T3SHAS5.C  
cl. T3SHAS5.A = T3SHAS5.C  
cm. T4SHAS5.A < T4SHAS5.C  
cn. T4SHAS5.A > T4SHAS5.C  
co. T4SHAS5.A = T4SHAS5.C  
cp. T5SHAS5.A < T5SHAS5.C  
cq. T5SHAS5.A > T5SHAS5.C  
cr. T5SHAS5.A = T5SHAS5.C  
cs. T6SHAS5.A < T6SHAS5.C  
ct. T6SHAS5.A > T6SHAS5.C  
cu. T6SHAS5.A = T6SHAS5.C  
cv. T7SHAS5.A < T7SHAS5.C  
cw. T7SHAS5.A > T7SHAS5.C  
cx. T7SHAS5.A = T7SHAS5.C  
cy. T8SHAS5.A < T8SHAS5.C  
-- T8SHAS5.A = T8SHAS5.C

- cz. T8SHAS5.A > T8SHAS5.C
- da. T8SHAS5.A = T8SHAS5.C
- db. T9SHAS5.A < T9SHAS5.C
- dc. T9SHAS5.A > T9SHAS5.C
- dd. T9SHAS5.A = T9SHAS5.C
- de. T10SHAS5.A < T10SHAS5.C
- df. T10SHAS5.A > T10SHAS5.C
- dg. T10SHAS5.A = T10SHAS5.C
- dh. T11SHAS5.A < T11SHAS5.C
- di. T11SHAS5.A > T11SHAS5.C
- dj. T11SHAS5.A = T11SHAS5.C
- dk. T12SHAS5.A < T12SHAS5.C
- dl. T12SHAS5.A > T12SHAS5.C
- dm. T12SHAS5.A = T12SHAS5.C

**Test Statistics<sup>a</sup>**

|                        | T0SHAS5.B - T0SHAS5.A | T1SHAS5.B - T1SHAS5.A | T2SHAS5.B - T2SHAS5.A | T3SHAS5.B - T3SHAS5.A |
|------------------------|-----------------------|-----------------------|-----------------------|-----------------------|
| Z                      | .000 <sup>b</sup>     | -1.000 <sup>c</sup>   | -1.000 <sup>c</sup>   | -1.000 <sup>c</sup>   |
| Asymp. Sig. (2-tailed) | 1.000                 | .317                  | .317                  | .317                  |

**Test Statistics<sup>a</sup>**

|                        | T4SHAS5.B - T4SHAS5.A | T5SHAS5.B - T5SHAS5.A | T6SHAS5.B - T6SHAS5.A | T7SHAS5.B - T7SHAS5.A |
|------------------------|-----------------------|-----------------------|-----------------------|-----------------------|
| Z                      | -.816 <sup>c</sup>    | -2.070 <sup>c</sup>   | -1.633 <sup>c</sup>   | -2.041 <sup>c</sup>   |
| Asymp. Sig. (2-tailed) | .414                  | .038                  | .102                  | .041                  |

**Test Statistics<sup>a</sup>**

|                        | T8SHAS5.B - T8SHAS5.A | T9SHAS5.B - T9SHAS5.A | T10SHAS5.B - T10SHAS5.A | T11SHAS5.B - T11SHAS5.A |
|------------------------|-----------------------|-----------------------|-------------------------|-------------------------|
| Z                      | -1.633 <sup>c</sup>   | -1.342 <sup>c</sup>   | -1.342 <sup>c</sup>     | -1.000 <sup>c</sup>     |
| Asymp. Sig. (2-tailed) | .102                  | .180                  | .180                    | .317                    |

**Test Statistics<sup>a</sup>**

|                        | T12SHAS5.B - T12SHAS5.A | T0SHAS5.C - T0SHAS5.B | T1SHAS5.C - T1SHAS5.B | T2SHAS5.C - T2SHAS5.B |
|------------------------|-------------------------|-----------------------|-----------------------|-----------------------|
| Z                      | -1.000 <sup>c</sup>     | .000 <sup>b</sup>     | .000 <sup>b</sup>     | .000 <sup>b</sup>     |
| Asymp. Sig. (2-tailed) | .317                    | 1.000                 | 1.000                 | 1.000                 |

**Test Statistics<sup>a</sup>**

|                        | T3SHAS5.C - T3SHAS5.B | T4SHAS5.C - T4SHAS5.B | T5SHAS5.C - T5SHAS5.B | T6SHAS5.C - T6SHAS5.B |
|------------------------|-----------------------|-----------------------|-----------------------|-----------------------|
| Z                      | -1.414 <sup>d</sup>   | -.577 <sup>d</sup>    | -2.236 <sup>d</sup>   | -1.414 <sup>d</sup>   |
| Asymp. Sig. (2-tailed) | .157                  | .564                  | .025                  | .157                  |

| Test Statistics <sup>a</sup> |                       |                       |                       |                         |
|------------------------------|-----------------------|-----------------------|-----------------------|-------------------------|
|                              | T7SHAS5.C - T7SHAS5.B | T8SHAS5.C - T8SHAS5.B | T9SHAS5.C - T9SHAS5.B | T10SHAS5.C - T10SHAS5.B |
| Z                            | -1.414 <sup>d</sup>   | .000 <sup>b</sup>     | .000 <sup>b</sup>     | .000 <sup>b</sup>       |
| Asymp. Sig. (2-tailed)       | .157                  | 1.000                 | 1.000                 | 1.000                   |

| Test Statistics <sup>a</sup> |                         |                         |                       |                       |
|------------------------------|-------------------------|-------------------------|-----------------------|-----------------------|
|                              | T11SHAS5.C - T11SHAS5.B | T12SHAS5.C - T12SHAS5.B | T0SHAS5.A - T0SHAS5.C | T1SHAS5.A - T1SHAS5.C |
| Z                            | .000 <sup>b</sup>       | .000 <sup>b</sup>       | .000 <sup>b</sup>     | -1.000 <sup>d</sup>   |
| Asymp. Sig. (2-tailed)       | 1.000                   | 1.000                   | 1.000                 | .317                  |

| Test Statistics <sup>a</sup> |                       |                       |                       |                       |
|------------------------------|-----------------------|-----------------------|-----------------------|-----------------------|
|                              | T2SHAS5.A - T2SHAS5.C | T3SHAS5.A - T3SHAS5.C | T4SHAS5.A - T4SHAS5.C | T5SHAS5.A - T5SHAS5.C |
| Z                            | -1.000 <sup>d</sup>   | -.577 <sup>c</sup>    | -.378 <sup>d</sup>    | -.378 <sup>d</sup>    |
| Asymp. Sig. (2-tailed)       | .317                  | .564                  | .705                  | .705                  |

| Test Statistics <sup>a</sup> |                       |                       |                       |                       |
|------------------------------|-----------------------|-----------------------|-----------------------|-----------------------|
|                              | T6SHAS5.A - T6SHAS5.C | T7SHAS5.A - T7SHAS5.C | T8SHAS5.A - T8SHAS5.C | T9SHAS5.A - T9SHAS5.C |
| Z                            | .000 <sup>b</sup>     | -1.300 <sup>d</sup>   | -1.414 <sup>d</sup>   | -1.000 <sup>d</sup>   |
| Asymp. Sig. (2-tailed)       | 1.000                 | .194                  | .157                  | .317                  |

| Test Statistics <sup>a</sup> |                         |                         |                         |
|------------------------------|-------------------------|-------------------------|-------------------------|
|                              | T10SHAS5.A - T10SHAS5.C | T11SHAS5.A - T11SHAS5.C | T12SHAS5.A - T12SHAS5.C |
| Z                            | -1.000 <sup>d</sup>     | .000 <sup>b</sup>       | .000 <sup>b</sup>       |
| Asymp. Sig. (2-tailed)       | .317                    | 1.000                   | 1.000                   |

a. Wilcoxon Signed Ranks Test

b. The sum of negative ranks equals the sum of positive ranks.

c. Based on positive ranks.

d. Based on negative ranks.

## NPar Tests

### Notes

|                               |                                       |                                                                                                               |
|-------------------------------|---------------------------------------|---------------------------------------------------------------------------------------------------------------|
| <b>Output Created</b>         |                                       | <b>05-MAR-2025 21:25:35</b>                                                                                   |
| <b>Comments</b>               |                                       |                                                                                                               |
| <b>Input</b>                  | <b>Data</b>                           | <b>/Users/dicec004/My Drive/WANA stuff/WANA Merged Data.sav</b>                                               |
|                               | <b>Active Dataset</b>                 | <b>DataSet1</b>                                                                                               |
|                               | <b>Filter</b>                         | <b>&lt;none&gt;</b>                                                                                           |
|                               | <b>Weight</b>                         | <b>&lt;none&gt;</b>                                                                                           |
|                               | <b>Split File</b>                     | <b>&lt;none&gt;</b>                                                                                           |
|                               | <b>N of Rows in Working Data File</b> | <b>20</b>                                                                                                     |
| <b>Missing Value Handling</b> | <b>Definition of Missing</b>          | <b>User-defined missing values are treated as missing.</b>                                                    |
|                               | <b>Cases Used</b>                     | <b>Statistics for each test are based on all cases with valid data for the variable(s) used in that test.</b> |

## Notes

### Syntax

```
NPAR TESTS
/WILCOXON=T0SHAS6.
A T1SHAS6.A T2SHAS6.A
T3SHAS6.A T4SHAS6.A
T5SHAS6.A T6SHAS6.A
T7SHAS6.A T8SHAS6.A
T9SHAS6.A T10SHAS6.A
T11SHAS6.A
T12SHAS6.A
T0SHAS6.B T1SHAS6.
B T2SHAS6.B T3SHAS6.B
T4SHAS6.B T5SHAS6.B
T6SHAS6.B T7SHAS6.B
T8SHAS6.B T9SHAS6.B
T10SHAS6.B
T11SHAS6.B
T12SHAS6.B
T0SHAS6.C T1SHAS6.
C T2SHAS6.C T3SHAS6.C
T4SHAS6.C T5SHAS6.C
T6SHAS6.C T7SHAS6.C
T8SHAS6.C T9SHAS6.C
T10SHAS6.C
T11SHAS6.C
T12SHAS6.C
WITH
T0SHAS6.B T1SHAS6.
B T2SHAS6.B T3SHAS6.B
T4SHAS6.B T5SHAS6.B
T6SHAS6.B T7SHAS6.B
T8SHAS6.B T9SHAS6.B
T10SHAS6.B
T11SHAS6.B
T12SHAS6.B
T0SHAS6.C T1SHAS6.
C T2SHAS6.C T3SHAS6.C
T4SHAS6.C T5SHAS6.C
T6SHAS6.C T7SHAS6.C
T8SHAS6.C T9SHAS6.C
T10SHAS6.C
T11SHAS6.C
T12SHAS6.C
T0SHAS6.A T1SHAS6.
A T2SHAS6.A T3SHAS6.A
T4SHAS6.A T5SHAS6.A
T6SHAS6.A T7SHAS6.A
T8SHAS6.A T9SHAS6.A
T10SHAS6.A
T11SHAS6.A
T12SHAS6.A (PAIRED)
/STATISTICS
DESCRIPTIVES
/MISSING ANALYSIS.
```

### Notes

|           |                                      |             |
|-----------|--------------------------------------|-------------|
| Resources | Processor Time                       | 00:00:00.06 |
|           | Elapsed Time                         | 00:00:01.00 |
|           | Number of Cases Allowed <sup>a</sup> | 71493       |

a. Based on availability of workspace memory.

### Descriptive Statistics

|            | N  | Mean | Std. Deviation | Minimum | Maximum |
|------------|----|------|----------------|---------|---------|
| T0SHAS6.A  | 19 | 1.00 | .000           | 1       | 1       |
| T1SHAS6.A  | 16 | 1.06 | .250           | 1       | 2       |
| T2SHAS6.A  | 17 | 1.00 | .000           | 1       | 1       |
| T3SHAS6.A  | 19 | 1.16 | .688           | 1       | 4       |
| T4SHAS6.A  | 19 | 1.16 | .501           | 1       | 3       |
| T5SHAS6.A  | 19 | 1.21 | .535           | 1       | 3       |
| T6SHAS6.A  | 19 | 1.42 | 1.387          | 1       | 7       |
| T7SHAS6.A  | 19 | 1.32 | 1.157          | 1       | 6       |
| T8SHAS6.A  | 19 | 1.32 | .820           | 1       | 4       |
| T9SHAS6.A  | 19 | 1.26 | .733           | 1       | 4       |
| T10SHAS6.A | 19 | 1.11 | .315           | 1       | 2       |
| T11SHAS6.A | 19 | 1.11 | .315           | 1       | 2       |
| T12SHAS6.A | 18 | 1.06 | .236           | 1       | 2       |
| T0SHAS6.B  | 19 | 1.00 | .000           | 1       | 1       |
| T1SHAS6.B  | 18 | 1.00 | .000           | 1       | 1       |
| T2SHAS6.B  | 19 | 1.00 | .000           | 1       | 1       |
| T3SHAS6.B  | 19 | 1.00 | .000           | 1       | 1       |
| T4SHAS6.B  | 19 | 1.00 | .000           | 1       | 1       |
| T5SHAS6.B  | 19 | 1.00 | .000           | 1       | 1       |
| T6SHAS6.B  | 19 | 1.00 | .000           | 1       | 1       |
| T7SHAS6.B  | 19 | 1.00 | .000           | 1       | 1       |
| T8SHAS6.B  | 18 | 1.00 | .000           | 1       | 1       |
| T9SHAS6.B  | 19 | 1.00 | .000           | 1       | 1       |
| T10SHAS6.B | 19 | 1.00 | .000           | 1       | 1       |
| T11SHAS6.B | 18 | 1.00 | .000           | 1       | 1       |
| T12SHAS6.B | 17 | 1.00 | .000           | 1       | 1       |
| T0SHAS6.C  | 18 | 1.00 | .000           | 1       | 1       |
| T1SHAS6.C  | 18 | 1.00 | .000           | 1       | 1       |
| T2SHAS6.C  | 17 | 1.00 | .000           | 1       | 1       |
| T3SHAS6.C  | 18 | 1.06 | .236           | 1       | 2       |
| T4SHAS6.C  | 18 | 1.06 | .236           | 1       | 2       |
| T5SHAS6.C  | 18 | 1.22 | .428           | 1       | 2       |
| T6SHAS6.C  | 18 | 1.11 | .471           | 1       | 3       |

### Descriptive Statistics

|            | N  | Mean | Std. Deviation | Minimum | Maximum |
|------------|----|------|----------------|---------|---------|
| T7SHAS6.C  | 17 | 1.18 | .393           | 1       | 2       |
| T8SHAS6.C  | 18 | 1.17 | .514           | 1       | 3       |
| T9SHAS6.C  | 18 | 1.00 | .000           | 1       | 1       |
| T10SHAS6.C | 18 | 1.11 | .323           | 1       | 2       |
| T11SHAS6.C | 17 | 1.06 | .243           | 1       | 2       |
| T12SHAS6.C | 17 | 1.12 | .332           | 1       | 2       |

### Wilcoxon Signed Ranks Test

#### Ranks

|                       |                | N               | Mean Rank | Sum of Ranks |
|-----------------------|----------------|-----------------|-----------|--------------|
| T0SHAS6.B - T0SHAS6.A | Negative Ranks | 0 <sup>a</sup>  | .00       | .00          |
|                       | Positive Ranks | 0 <sup>b</sup>  | .00       | .00          |
|                       | Ties           | 19 <sup>c</sup> |           |              |
|                       | Total          | 19              |           |              |
| T1SHAS6.B - T1SHAS6.A | Negative Ranks | 1 <sup>d</sup>  | 1.00      | 1.00         |
|                       | Positive Ranks | 0 <sup>e</sup>  | .00       | .00          |
|                       | Ties           | 14 <sup>f</sup> |           |              |
|                       | Total          | 15              |           |              |
| T2SHAS6.B - T2SHAS6.A | Negative Ranks | 0 <sup>g</sup>  | .00       | .00          |
|                       | Positive Ranks | 0 <sup>h</sup>  | .00       | .00          |
|                       | Ties           | 17 <sup>i</sup> |           |              |
|                       | Total          | 17              |           |              |
| T3SHAS6.B - T3SHAS6.A | Negative Ranks | 1 <sup>j</sup>  | 1.00      | 1.00         |
|                       | Positive Ranks | 0 <sup>k</sup>  | .00       | .00          |
|                       | Ties           | 18 <sup>l</sup> |           |              |
|                       | Total          | 19              |           |              |
| T4SHAS6.B - T4SHAS6.A | Negative Ranks | 2 <sup>m</sup>  | 1.50      | 3.00         |
|                       | Positive Ranks | 0 <sup>n</sup>  | .00       | .00          |
|                       | Ties           | 17 <sup>o</sup> |           |              |
|                       | Total          | 19              |           |              |
| T5SHAS6.B - T5SHAS6.A | Negative Ranks | 3 <sup>p</sup>  | 2.00      | 6.00         |
|                       | Positive Ranks | 0 <sup>q</sup>  | .00       | .00          |
|                       | Ties           | 16 <sup>r</sup> |           |              |
|                       | Total          | 19              |           |              |
| T6SHAS6.B - T6SHAS6.A | Negative Ranks | 3 <sup>s</sup>  | 2.00      | 6.00         |
|                       | Positive Ranks | 0 <sup>t</sup>  | .00       | .00          |
|                       | Ties           | 16 <sup>u</sup> |           |              |
|                       | Total          | 19              |           |              |

### Ranks

|                         |                | N                | Mean Rank | Sum of Ranks |
|-------------------------|----------------|------------------|-----------|--------------|
| T7SHAS6.B - T7SHAS6.A   | Negative Ranks | 2 <sup>v</sup>   | 1.50      | 3.00         |
|                         | Positive Ranks | 0 <sup>w</sup>   | .00       | .00          |
|                         | Ties           | 17 <sup>x</sup>  |           |              |
|                         | Total          | 19               |           |              |
| T8SHAS6.B - T8SHAS6.A   | Negative Ranks | 3 <sup>y</sup>   | 2.00      | 6.00         |
|                         | Positive Ranks | 0 <sup>z</sup>   | .00       | .00          |
|                         | Ties           | 15 <sup>aa</sup> |           |              |
|                         | Total          | 18               |           |              |
| T9SHAS6.B - T9SHAS6.A   | Negative Ranks | 3 <sup>ab</sup>  | 2.00      | 6.00         |
|                         | Positive Ranks | 0 <sup>ac</sup>  | .00       | .00          |
|                         | Ties           | 16 <sup>ad</sup> |           |              |
|                         | Total          | 19               |           |              |
| T10SHAS6.B - T10SHAS6.A | Negative Ranks | 2 <sup>ae</sup>  | 1.50      | 3.00         |
|                         | Positive Ranks | 0 <sup>af</sup>  | .00       | .00          |
|                         | Ties           | 17 <sup>ag</sup> |           |              |
|                         | Total          | 19               |           |              |
| T11SHAS6.B - T11SHAS6.A | Negative Ranks | 2 <sup>ah</sup>  | 1.50      | 3.00         |
|                         | Positive Ranks | 0 <sup>ai</sup>  | .00       | .00          |
|                         | Ties           | 16 <sup>aj</sup> |           |              |
|                         | Total          | 18               |           |              |
| T12SHAS6.B - T12SHAS6.A | Negative Ranks | 1 <sup>ak</sup>  | 1.00      | 1.00         |
|                         | Positive Ranks | 0 <sup>al</sup>  | .00       | .00          |
|                         | Ties           | 15 <sup>am</sup> |           |              |
|                         | Total          | 16               |           |              |
| T0SHAS6.C - T0SHAS6.B   | Negative Ranks | 0 <sup>an</sup>  | .00       | .00          |
|                         | Positive Ranks | 0 <sup>ao</sup>  | .00       | .00          |
|                         | Ties           | 18 <sup>ap</sup> |           |              |
|                         | Total          | 18               |           |              |
| T1SHAS6.C - T1SHAS6.B   | Negative Ranks | 0 <sup>aq</sup>  | .00       | .00          |
|                         | Positive Ranks | 0 <sup>ar</sup>  | .00       | .00          |
|                         | Ties           | 17 <sup>as</sup> |           |              |
|                         | Total          | 17               |           |              |
| T2SHAS6.C - T2SHAS6.B   | Negative Ranks | 0 <sup>at</sup>  | .00       | .00          |
|                         | Positive Ranks | 0 <sup>au</sup>  | .00       | .00          |
|                         | Ties           | 17 <sup>av</sup> |           |              |
|                         | Total          | 17               |           |              |
| T3SHAS6.C - T3SHAS6.B   | Negative Ranks | 0 <sup>aw</sup>  | .00       | .00          |
|                         | Positive Ranks | 1 <sup>ax</sup>  | 1.00      | 1.00         |

### Ranks

|                         |                | N                | Mean Rank | Sum of Ranks |
|-------------------------|----------------|------------------|-----------|--------------|
|                         | Ties           | 17 <sup>ay</sup> |           |              |
|                         | Total          | 18               |           |              |
| T4SHAS6.C - T4SHAS6.B   | Negative Ranks | 0 <sup>az</sup>  | .00       | .00          |
|                         | Positive Ranks | 1 <sup>ba</sup>  | 1.00      | 1.00         |
|                         | Ties           | 17 <sup>bb</sup> |           |              |
|                         | Total          | 18               |           |              |
|                         |                |                  |           |              |
| T5SHAS6.C - T5SHAS6.B   | Negative Ranks | 0 <sup>bc</sup>  | .00       | .00          |
|                         | Positive Ranks | 4 <sup>bd</sup>  | 2.50      | 10.00        |
|                         | Ties           | 14 <sup>be</sup> |           |              |
|                         | Total          | 18               |           |              |
| T6SHAS6.C - T6SHAS6.B   | Negative Ranks | 0 <sup>bf</sup>  | .00       | .00          |
|                         | Positive Ranks | 1 <sup>bg</sup>  | 1.00      | 1.00         |
|                         | Ties           | 17 <sup>bh</sup> |           |              |
|                         | Total          | 18               |           |              |
| T7SHAS6.C - T7SHAS6.B   | Negative Ranks | 0 <sup>bi</sup>  | .00       | .00          |
|                         | Positive Ranks | 3 <sup>bj</sup>  | 2.00      | 6.00         |
|                         | Ties           | 14 <sup>bk</sup> |           |              |
|                         | Total          | 17               |           |              |
| T8SHAS6.C - T8SHAS6.B   | Negative Ranks | 0 <sup>bl</sup>  | .00       | .00          |
|                         | Positive Ranks | 2 <sup>bm</sup>  | 1.50      | 3.00         |
|                         | Ties           | 15 <sup>bn</sup> |           |              |
|                         | Total          | 17               |           |              |
| T9SHAS6.C - T9SHAS6.B   | Negative Ranks | 0 <sup>bo</sup>  | .00       | .00          |
|                         | Positive Ranks | 0 <sup>bp</sup>  | .00       | .00          |
|                         | Ties           | 18 <sup>bq</sup> |           |              |
|                         | Total          | 18               |           |              |
| T10SHAS6.C - T10SHAS6.B | Negative Ranks | 0 <sup>br</sup>  | .00       | .00          |
|                         | Positive Ranks | 2 <sup>bs</sup>  | 1.50      | 3.00         |
|                         | Ties           | 16 <sup>bt</sup> |           |              |
|                         | Total          | 18               |           |              |
| T11SHAS6.C - T11SHAS6.B | Negative Ranks | 0 <sup>bu</sup>  | .00       | .00          |
|                         | Positive Ranks | 1 <sup>bv</sup>  | 1.00      | 1.00         |
|                         | Ties           | 15 <sup>bw</sup> |           |              |
|                         | Total          | 16               |           |              |
| T12SHAS6.C - T12SHAS6.B | Negative Ranks | 0 <sup>bx</sup>  | .00       | .00          |
|                         | Positive Ranks | 2 <sup>by</sup>  | 1.50      | 3.00         |
|                         | Ties           | 13 <sup>bz</sup> |           |              |
|                         | Total          | 15               |           |              |

### Ranks

|                       |                | N                | Mean Rank | Sum of Ranks |
|-----------------------|----------------|------------------|-----------|--------------|
| T0SHAS6.A - T0SHAS6.C | Negative Ranks | 0 <sup>ca</sup>  | .00       | .00          |
|                       | Positive Ranks | 0 <sup>cb</sup>  | .00       | .00          |
|                       | Ties           | 18 <sup>cc</sup> |           |              |
|                       | Total          | 18               |           |              |
| T1SHAS6.A - T1SHAS6.C | Negative Ranks | 0 <sup>cd</sup>  | .00       | .00          |
|                       | Positive Ranks | 1 <sup>ce</sup>  | 1.00      | 1.00         |
|                       | Ties           | 15 <sup>cf</sup> |           |              |
|                       | Total          | 16               |           |              |
| T2SHAS6.A - T2SHAS6.C | Negative Ranks | 0 <sup>cg</sup>  | .00       | .00          |
|                       | Positive Ranks | 0 <sup>ch</sup>  | .00       | .00          |
|                       | Ties           | 16 <sup>ci</sup> |           |              |
|                       | Total          | 16               |           |              |
| T3SHAS6.A - T3SHAS6.C | Negative Ranks | 1 <sup>cj</sup>  | 1.00      | 1.00         |
|                       | Positive Ranks | 0 <sup>ck</sup>  | .00       | .00          |
|                       | Ties           | 17 <sup>cl</sup> |           |              |
|                       | Total          | 18               |           |              |
| T4SHAS6.A - T4SHAS6.C | Negative Ranks | 1 <sup>cm</sup>  | 1.50      | 1.50         |
|                       | Positive Ranks | 1 <sup>cn</sup>  | 1.50      | 1.50         |
|                       | Ties           | 16 <sup>co</sup> |           |              |
|                       | Total          | 18               |           |              |
| T5SHAS6.A - T5SHAS6.C | Negative Ranks | 3 <sup>cp</sup>  | 2.50      | 7.50         |
|                       | Positive Ranks | 1 <sup>cq</sup>  | 2.50      | 2.50         |
|                       | Ties           | 14 <sup>cr</sup> |           |              |
|                       | Total          | 18               |           |              |
| T6SHAS6.A - T6SHAS6.C | Negative Ranks | 1 <sup>cs</sup>  | 3.00      | 3.00         |
|                       | Positive Ranks | 2 <sup>ct</sup>  | 1.50      | 3.00         |
|                       | Ties           | 15 <sup>cu</sup> |           |              |
|                       | Total          | 18               |           |              |
| T7SHAS6.A - T7SHAS6.C | Negative Ranks | 2 <sup>cv</sup>  | 1.50      | 3.00         |
|                       | Positive Ranks | 0 <sup>cw</sup>  | .00       | .00          |
|                       | Ties           | 15 <sup>cx</sup> |           |              |
|                       | Total          | 17               |           |              |
| T8SHAS6.A - T8SHAS6.C | Negative Ranks | 1 <sup>cy</sup>  | 1.50      | 1.50         |
|                       | Positive Ranks | 1 <sup>cz</sup>  | 1.50      | 1.50         |
|                       | Ties           | 16 <sup>da</sup> |           |              |
|                       | Total          | 18               |           |              |
| T9SHAS6.A - T9SHAS6.C | Negative Ranks | 0 <sup>db</sup>  | .00       | .00          |
|                       | Positive Ranks | 2 <sup>dc</sup>  | 1.50      | 3.00         |

### Ranks

|                         |                | N                | Mean Rank | Sum of Ranks |
|-------------------------|----------------|------------------|-----------|--------------|
|                         | Ties           | 16 <sup>dd</sup> |           |              |
|                         | Total          | 18               |           |              |
| T10SHAS6.A - T10SHAS6.C | Negative Ranks | 2 <sup>de</sup>  | 2.00      | 4.00         |
|                         | Positive Ranks | 1 <sup>df</sup>  | 2.00      | 2.00         |
|                         | Ties           | 15 <sup>dg</sup> |           |              |
|                         | Total          | 18               |           |              |
| T11SHAS6.A - T11SHAS6.C | Negative Ranks | 1 <sup>dh</sup>  | 1.50      | 1.50         |
|                         | Positive Ranks | 1 <sup>di</sup>  | 1.50      | 1.50         |
|                         | Ties           | 15 <sup>dj</sup> |           |              |
|                         | Total          | 17               |           |              |
| T12SHAS6.A - T12SHAS6.C | Negative Ranks | 2 <sup>dk</sup>  | 1.50      | 3.00         |
|                         | Positive Ranks | 0 <sup>dl</sup>  | .00       | .00          |
|                         | Ties           | 14 <sup>dm</sup> |           |              |
|                         | Total          | 16               |           |              |

- a. T0SHAS6.B < T0SHAS6.A
- b. T0SHAS6.B > T0SHAS6.A
- c. T0SHAS6.B = T0SHAS6.A
- d. T1SHAS6.B < T1SHAS6.A
- e. T1SHAS6.B > T1SHAS6.A
- f. T1SHAS6.B = T1SHAS6.A
- g. T2SHAS6.B < T2SHAS6.A
- h. T2SHAS6.B > T2SHAS6.A
- i. T2SHAS6.B = T2SHAS6.A
- j. T3SHAS6.B < T3SHAS6.A
- k. T3SHAS6.B > T3SHAS6.A
- l. T3SHAS6.B = T3SHAS6.A
- m. T4SHAS6.B < T4SHAS6.A
- n. T4SHAS6.B > T4SHAS6.A
- o. T4SHAS6.B = T4SHAS6.A
- p. T5SHAS6.B < T5SHAS6.A

p. T5SHAS6.B < T5SHAS6.A  
q. T5SHAS6.B > T5SHAS6.A  
r. T5SHAS6.B = T5SHAS6.A  
s. T6SHAS6.B < T6SHAS6.A  
t. T6SHAS6.B > T6SHAS6.A  
u. T6SHAS6.B = T6SHAS6.A  
v. T7SHAS6.B < T7SHAS6.A  
w. T7SHAS6.B > T7SHAS6.A  
x. T7SHAS6.B = T7SHAS6.A  
y. T8SHAS6.B < T8SHAS6.A  
z. T8SHAS6.B > T8SHAS6.A  
aa. T8SHAS6.B = T8SHAS6.A  
ab. T9SHAS6.B < T9SHAS6.A  
ac. T9SHAS6.B > T9SHAS6.A  
ad. T9SHAS6.B = T9SHAS6.A  
ae. T10SHAS6.B < T10SHAS6.A  
af. T10SHAS6.B > T10SHAS6.A  
ag. T10SHAS6.B = T10SHAS6.A  
ah. T11SHAS6.B < T11SHAS6.A  
ai. T11SHAS6.B > T11SHAS6.A  
aj. T11SHAS6.B = T11SHAS6.A  
ak. T12SHAS6.B < T12SHAS6.A  
al. T12SHAS6.B > T12SHAS6.A  
am. T12SHAS6.B = T12SHAS6.A  
an. T0SHAS6.C < T0SHAS6.B  
ao. T0SHAS6.C > T0SHAS6.B  
ap. T0SHAS6.C = T0SHAS6.B  
aq. T1SHAS6.C < T1SHAS6.B  
ar. T1SHAS6.C > T1SHAS6.B  
as. T1SHAS6.C = T1SHAS6.B  
at. T2SHAS6.C < T2SHAS6.B  
au. T2SHAS6.C > T2SHAS6.B  
av. T2SHAS6.C = T2SHAS6.B  
aw. T3SHAS6.C < T3SHAS6.B  
ax. T3SHAS6.C > T3SHAS6.B  
ay. T3SHAS6.C = T3SHAS6.B  
az. T4SHAS6.C < T4SHAS6.B  
ba. T4SHAS6.C > T4SHAS6.B  
bb. T4SHAS6.C = T4SHAS6.B  
bc. T5SHAS6.C < T5SHAS6.B  
bd. T5SHAS6.C > T5SHAS6.B  
be. T5SHAS6.C = T5SHAS6.B  
bf. T6SHAS6.C < T6SHAS6.B  
bg. T6SHAS6.C > T6SHAS6.B  
bh. T6SHAS6.C = T6SHAS6.B

bh. T6SHAS6.C = T6SHAS6.B  
bi. T7SHAS6.C < T7SHAS6.B  
bj. T7SHAS6.C > T7SHAS6.B  
bk. T7SHAS6.C = T7SHAS6.B  
bl. T8SHAS6.C < T8SHAS6.B  
bm. T8SHAS6.C > T8SHAS6.B  
bn. T8SHAS6.C = T8SHAS6.B  
bo. T9SHAS6.C < T9SHAS6.B  
bp. T9SHAS6.C > T9SHAS6.B  
bq. T9SHAS6.C = T9SHAS6.B  
br. T10SHAS6.C < T10SHAS6.B  
bs. T10SHAS6.C > T10SHAS6.B  
bt. T10SHAS6.C = T10SHAS6.B  
bu. T11SHAS6.C < T11SHAS6.B  
bv. T11SHAS6.C > T11SHAS6.B  
bw. T11SHAS6.C = T11SHAS6.B  
bx. T12SHAS6.C < T12SHAS6.B  
by. T12SHAS6.C > T12SHAS6.B  
bz. T12SHAS6.C = T12SHAS6.B  
ca. T0SHAS6.A < T0SHAS6.C  
cb. T0SHAS6.A > T0SHAS6.C  
cc. T0SHAS6.A = T0SHAS6.C  
cd. T1SHAS6.A < T1SHAS6.C  
ce. T1SHAS6.A > T1SHAS6.C  
cf. T1SHAS6.A = T1SHAS6.C  
cg. T2SHAS6.A < T2SHAS6.C  
ch. T2SHAS6.A > T2SHAS6.C  
ci. T2SHAS6.A = T2SHAS6.C  
cj. T3SHAS6.A < T3SHAS6.C  
ck. T3SHAS6.A > T3SHAS6.C  
cl. T3SHAS6.A = T3SHAS6.C  
cm. T4SHAS6.A < T4SHAS6.C  
cn. T4SHAS6.A > T4SHAS6.C  
co. T4SHAS6.A = T4SHAS6.C  
cp. T5SHAS6.A < T5SHAS6.C  
cq. T5SHAS6.A > T5SHAS6.C  
cr. T5SHAS6.A = T5SHAS6.C  
cs. T6SHAS6.A < T6SHAS6.C  
ct. T6SHAS6.A > T6SHAS6.C  
cu. T6SHAS6.A = T6SHAS6.C  
cv. T7SHAS6.A < T7SHAS6.C  
cw. T7SHAS6.A > T7SHAS6.C  
cx. T7SHAS6.A = T7SHAS6.C  
cy. T8SHAS6.A < T8SHAS6.C  
-- T8SHAS6.A = T8SHAS6.C

- cz. T8SHAS6.A > T8SHAS6.C
- da. T8SHAS6.A = T8SHAS6.C
- db. T9SHAS6.A < T9SHAS6.C
- dc. T9SHAS6.A > T9SHAS6.C
- dd. T9SHAS6.A = T9SHAS6.C
- de. T10SHAS6.A < T10SHAS6.C
- df. T10SHAS6.A > T10SHAS6.C
- dg. T10SHAS6.A = T10SHAS6.C
- dh. T11SHAS6.A < T11SHAS6.C
- di. T11SHAS6.A > T11SHAS6.C
- dj. T11SHAS6.A = T11SHAS6.C
- dk. T12SHAS6.A < T12SHAS6.C
- dl. T12SHAS6.A > T12SHAS6.C
- dm. T12SHAS6.A = T12SHAS6.C

**Test Statistics<sup>a</sup>**

|                        | T0SHAS6.B - T0SHAS6.A | T1SHAS6.B - T1SHAS6.A | T2SHAS6.B - T2SHAS6.A | T3SHAS6.B - T3SHAS6.A |
|------------------------|-----------------------|-----------------------|-----------------------|-----------------------|
| Z                      | .000 <sup>b</sup>     | -1.000 <sup>c</sup>   | .000 <sup>b</sup>     | -1.000 <sup>c</sup>   |
| Asymp. Sig. (2-tailed) | 1.000                 | .317                  | 1.000                 | .317                  |

**Test Statistics<sup>a</sup>**

|                        | T4SHAS6.B - T4SHAS6.A | T5SHAS6.B - T5SHAS6.A | T6SHAS6.B - T6SHAS6.A | T7SHAS6.B - T7SHAS6.A |
|------------------------|-----------------------|-----------------------|-----------------------|-----------------------|
| Z                      | -1.342 <sup>c</sup>   | -1.633 <sup>c</sup>   | -1.633 <sup>c</sup>   | -1.342 <sup>c</sup>   |
| Asymp. Sig. (2-tailed) | .180                  | .102                  | .102                  | .180                  |

**Test Statistics<sup>a</sup>**

|                        | T8SHAS6.B - T8SHAS6.A | T9SHAS6.B - T9SHAS6.A | T10SHAS6.B - T10SHAS6.A | T11SHAS6.B - T11SHAS6.A |
|------------------------|-----------------------|-----------------------|-------------------------|-------------------------|
| Z                      | -1.604 <sup>c</sup>   | -1.633 <sup>c</sup>   | -1.414 <sup>c</sup>     | -1.414 <sup>c</sup>     |
| Asymp. Sig. (2-tailed) | .109                  | .102                  | .157                    | .157                    |

**Test Statistics<sup>a</sup>**

|                        | T12SHAS6.B - T12SHAS6.A | T0SHAS6.C - T0SHAS6.B | T1SHAS6.C - T1SHAS6.B | T2SHAS6.C - T2SHAS6.B |
|------------------------|-------------------------|-----------------------|-----------------------|-----------------------|
| Z                      | -1.000 <sup>c</sup>     | .000 <sup>b</sup>     | .000 <sup>b</sup>     | .000 <sup>b</sup>     |
| Asymp. Sig. (2-tailed) | .317                    | 1.000                 | 1.000                 | 1.000                 |

**Test Statistics<sup>a</sup>**

|                        | T3SHAS6.C - T3SHAS6.B | T4SHAS6.C - T4SHAS6.B | T5SHAS6.C - T5SHAS6.B | T6SHAS6.C - T6SHAS6.B |
|------------------------|-----------------------|-----------------------|-----------------------|-----------------------|
| Z                      | -1.000 <sup>d</sup>   | -1.000 <sup>d</sup>   | -2.000 <sup>d</sup>   | -1.000 <sup>d</sup>   |
| Asymp. Sig. (2-tailed) | .317                  | .317                  | .046                  | .317                  |

**Test Statistics<sup>a</sup>**

|                        | T7SHAS6.C - T7SHAS6.B | T8SHAS6.C - T8SHAS6.B | T9SHAS6.C - T9SHAS6.B | T10SHAS6.C - T10SHAS6.B |
|------------------------|-----------------------|-----------------------|-----------------------|-------------------------|
| Z                      | -1.732 <sup>d</sup>   | -1.342 <sup>d</sup>   | .000 <sup>b</sup>     | -1.414 <sup>d</sup>     |
| Asymp. Sig. (2-tailed) | .083                  | .180                  | 1.000                 | .157                    |

**Test Statistics<sup>a</sup>**

|                        | T11SHAS6.C - T11SHAS6.B | T12SHAS6.C - T12SHAS6.B | T0SHAS6.A - T0SHAS6.C | T1SHAS6.A - T1SHAS6.C |
|------------------------|-------------------------|-------------------------|-----------------------|-----------------------|
| Z                      | -1.000 <sup>d</sup>     | -1.414 <sup>d</sup>     | .000 <sup>b</sup>     | -1.000 <sup>d</sup>   |
| Asymp. Sig. (2-tailed) | .317                    | .157                    | 1.000                 | .317                  |

**Test Statistics<sup>a</sup>**

|                        | T2SHAS6.A - T2SHAS6.C | T3SHAS6.A - T3SHAS6.C | T4SHAS6.A - T4SHAS6.C | T5SHAS6.A - T5SHAS6.C |
|------------------------|-----------------------|-----------------------|-----------------------|-----------------------|
| Z                      | .000 <sup>b</sup>     | -1.000 <sup>c</sup>   | .000 <sup>b</sup>     | -1.000 <sup>c</sup>   |
| Asymp. Sig. (2-tailed) | 1.000                 | .317                  | 1.000                 | .317                  |

**Test Statistics<sup>a</sup>**

|                        | T6SHAS6.A - T6SHAS6.C | T7SHAS6.A - T7SHAS6.C | T8SHAS6.A - T8SHAS6.C | T9SHAS6.A - T9SHAS6.C |
|------------------------|-----------------------|-----------------------|-----------------------|-----------------------|
| Z                      | .000 <sup>b</sup>     | -1.414 <sup>c</sup>   | .000 <sup>b</sup>     | -1.414 <sup>d</sup>   |
| Asymp. Sig. (2-tailed) | 1.000                 | .157                  | 1.000                 | .157                  |

**Test Statistics<sup>a</sup>**

|                        | T10SHAS6.A - T10SHAS6.C | T11SHAS6.A - T11SHAS6.C | T12SHAS6.A - T12SHAS6.C |
|------------------------|-------------------------|-------------------------|-------------------------|
| Z                      | -.577 <sup>c</sup>      | .000 <sup>b</sup>       | -1.414 <sup>c</sup>     |
| Asymp. Sig. (2-tailed) | .564                    | 1.000                   | .157                    |

a. Wilcoxon Signed Ranks Test

b. The sum of negative ranks equals the sum of positive ranks.

c. Based on positive ranks.

d. Based on negative ranks.

**NPar Tests**

## Notes

Syntax

```
NPART TESTS

/WILCOXON=T0SHAS10.
A T1SHAS10.A
T2SHAS10.A T3SHAS10.
A T4SHAS10.A
T5SHAS10.A T6SHAS10.
A T7SHAS10.A
T8SHAS10.A T9SHAS10.
A T10SHAS10.A
  T11SHAS10.A
T12SHAS10.A
  T0SHAS10.B
T1SHAS10.B T2SHAS10.B
T3SHAS10.B T4SHAS10.B
T5SHAS10.B T6SHAS10.B
T7SHAS10.B T8SHAS10.B
T9SHAS10.B T10SHAS10.
B
  T11SHAS10.B
T12SHAS10.B
  T0SHAS10.C
T1SHAS10.C T2SHAS10.
C T3SHAS10.C
T4SHAS10.C T5SHAS10.
C T6SHAS10.C
T7SHAS10.C T8SHAS10.
C T9SHAS10.C
T10SHAS10.C
  T11SHAS10.C
T12SHAS10.C
  WITH
  T0SHAS10.B
T1SHAS10.B T2SHAS10.B
T3SHAS10.B T4SHAS10.B
T5SHAS10.B T6SHAS10.B
T7SHAS10.B T8SHAS10.B
T9SHAS10.B T10SHAS10.
B
  T11SHAS10.B
T12SHAS10.B
  T0SHAS10.C
T1SHAS10.C T2SHAS10.
C T3SHAS10.C
T4SHAS10.C T5SHAS10.
C T6SHAS10.C
T7SHAS10.C T8SHAS10.
C T9SHAS10.C
T10SHAS10.C
  T11SHAS10.C
T12SHAS10.C
  T0SHAS10.A
T1SHAS10.A T2SHAS10.
A T3SHAS10.A
T4SHAS10.A T5SHAS10.
A T6SHAS10.A
T7SHAS10.A T8SHAS10.
A T9SHAS10.A
T10SHAS10.A
  T11SHAS10.A
T12SHAS10.A (PAIRED)
/STATISTICS
DESCRIPTIVES
/MISSING ANALYSIS.
```

### Notes

|           |                                      |             |
|-----------|--------------------------------------|-------------|
| Resources | Processor Time                       | 00:00:00.06 |
|           | Elapsed Time                         | 00:00:00.00 |
|           | Number of Cases Allowed <sup>a</sup> | 71493       |

a. Based on availability of workspace memory.

### Descriptive Statistics

|             | N  | Mean | Std. Deviation | Minimum | Maximum |
|-------------|----|------|----------------|---------|---------|
| T0SHAS10.A  | 19 | 1.00 | .000           | 1       | 1       |
| T1SHAS10.A  | 16 | 1.19 | .750           | 1       | 4       |
| T2SHAS10.A  | 17 | 1.18 | .529           | 1       | 3       |
| T3SHAS10.A  | 19 | 1.16 | .501           | 1       | 3       |
| T4SHAS10.A  | 19 | 1.47 | .772           | 1       | 3       |
| T5SHAS10.A  | 19 | 2.37 | 1.300          | 1       | 6       |
| T6SHAS10.A  | 19 | 2.21 | 1.548          | 1       | 6       |
| T7SHAS10.A  | 19 | 2.42 | 1.710          | 1       | 7       |
| T8SHAS10.A  | 19 | 2.11 | 1.560          | 1       | 7       |
| T9SHAS10.A  | 19 | 1.89 | 1.243          | 1       | 5       |
| T10SHAS10.A | 19 | 1.74 | 1.046          | 1       | 5       |
| T11SHAS10.A | 19 | 1.37 | .761           | 1       | 4       |
| T12SHAS10.A | 18 | 1.33 | .767           | 1       | 4       |
| T0SHAS10.B  | 19 | 1.00 | .000           | 1       | 1       |
| T1SHAS10.B  | 18 | 1.00 | .000           | 1       | 1       |
| T2SHAS10.B  | 19 | 1.00 | .000           | 1       | 1       |
| T3SHAS10.B  | 19 | 1.05 | .229           | 1       | 2       |
| T4SHAS10.B  | 19 | 1.00 | .000           | 1       | 1       |
| T5SHAS10.B  | 19 | 1.16 | .375           | 1       | 2       |
| T6SHAS10.B  | 19 | 1.26 | .806           | 1       | 4       |
| T7SHAS10.B  | 19 | 1.32 | 1.003          | 1       | 5       |
| T8SHAS10.B  | 18 | 1.22 | .548           | 1       | 3       |
| T9SHAS10.B  | 19 | 1.16 | .375           | 1       | 2       |
| T10SHAS10.B | 19 | 1.05 | .229           | 1       | 2       |
| T11SHAS10.B | 18 | 1.11 | .323           | 1       | 2       |
| T12SHAS10.B | 17 | 1.06 | .243           | 1       | 2       |
| T0SHAS10.C  | 18 | 1.00 | .000           | 1       | 1       |
| T1SHAS10.C  | 18 | 1.00 | .000           | 1       | 1       |
| T2SHAS10.C  | 17 | 1.00 | .000           | 1       | 1       |
| T3SHAS10.C  | 18 | 1.11 | .323           | 1       | 2       |
| T4SHAS10.C  | 18 | 1.56 | .856           | 1       | 4       |
| T5SHAS10.C  | 18 | 2.00 | 1.328          | 1       | 6       |
| T6SHAS10.C  | 18 | 2.50 | 1.823          | 1       | 7       |

### Descriptive Statistics

|             | N  | Mean | Std. Deviation | Minimum | Maximum |
|-------------|----|------|----------------|---------|---------|
| T7SHAS10.C  | 18 | 2.28 | 1.447          | 1       | 6       |
| T8SHAS10.C  | 18 | 2.00 | 1.715          | 1       | 7       |
| T9SHAS10.C  | 18 | 1.83 | 1.200          | 1       | 5       |
| T10SHAS10.C | 18 | 1.67 | 1.085          | 1       | 5       |
| T11SHAS10.C | 17 | 1.65 | .931           | 1       | 4       |
| T12SHAS10.C | 17 | 1.35 | .606           | 1       | 3       |

### Wilcoxon Signed Ranks Test

#### Ranks

|                         |                | N               | Mean Rank | Sum of Ranks |
|-------------------------|----------------|-----------------|-----------|--------------|
| T0SHAS10.B - T0SHAS10.A | Negative Ranks | 0 <sup>a</sup>  | .00       | .00          |
|                         | Positive Ranks | 0 <sup>b</sup>  | .00       | .00          |
|                         | Ties           | 19 <sup>c</sup> |           |              |
|                         | Total          | 19              |           |              |
| T1SHAS10.B - T1SHAS10.A | Negative Ranks | 1 <sup>d</sup>  | 1.00      | 1.00         |
|                         | Positive Ranks | 0 <sup>e</sup>  | .00       | .00          |
|                         | Ties           | 14 <sup>f</sup> |           |              |
|                         | Total          | 15              |           |              |
| T2SHAS10.B - T2SHAS10.A | Negative Ranks | 2 <sup>g</sup>  | 1.50      | 3.00         |
|                         | Positive Ranks | 0 <sup>h</sup>  | .00       | .00          |
|                         | Ties           | 15 <sup>i</sup> |           |              |
|                         | Total          | 17              |           |              |
| T3SHAS10.B - T3SHAS10.A | Negative Ranks | 2 <sup>j</sup>  | 2.25      | 4.50         |
|                         | Positive Ranks | 1 <sup>k</sup>  | 1.50      | 1.50         |
|                         | Ties           | 16 <sup>l</sup> |           |              |
|                         | Total          | 19              |           |              |
| T4SHAS10.B - T4SHAS10.A | Negative Ranks | 6 <sup>m</sup>  | 3.50      | 21.00        |
|                         | Positive Ranks | 0 <sup>n</sup>  | .00       | .00          |
|                         | Ties           | 13 <sup>o</sup> |           |              |
|                         | Total          | 19              |           |              |
| T5SHAS10.B - T5SHAS10.A | Negative Ranks | 14 <sup>p</sup> | 8.21      | 115.00       |
|                         | Positive Ranks | 1 <sup>q</sup>  | 5.00      | 5.00         |
|                         | Ties           | 4 <sup>r</sup>  |           |              |
|                         | Total          | 19              |           |              |
| T6SHAS10.B - T6SHAS10.A | Negative Ranks | 9 <sup>s</sup>  | 5.39      | 48.50        |
|                         | Positive Ranks | 1 <sup>t</sup>  | 6.50      | 6.50         |
|                         | Ties           | 9 <sup>u</sup>  |           |              |
|                         | Total          | 19              |           |              |

### Ranks

|                           |                | N                | Mean Rank | Sum of Ranks |
|---------------------------|----------------|------------------|-----------|--------------|
| T7SHAS10.B - T7SHAS10.A   | Negative Ranks | 11 <sup>v</sup>  | 6.00      | 66.00        |
|                           | Positive Ranks | 0 <sup>w</sup>   | .00       | .00          |
|                           | Ties           | 8 <sup>x</sup>   |           |              |
|                           | Total          | 19               |           |              |
| T8SHAS10.B - T8SHAS10.A   | Negative Ranks | 8 <sup>y</sup>   | 4.50      | 36.00        |
|                           | Positive Ranks | 0 <sup>z</sup>   | .00       | .00          |
|                           | Ties           | 10 <sup>aa</sup> |           |              |
|                           | Total          | 18               |           |              |
| T9SHAS10.B - T9SHAS10.A   | Negative Ranks | 9 <sup>ab</sup>  | 5.72      | 51.50        |
|                           | Positive Ranks | 1 <sup>ac</sup>  | 3.50      | 3.50         |
|                           | Ties           | 9 <sup>ad</sup>  |           |              |
|                           | Total          | 19               |           |              |
| T10SHAS10.B - T10SHAS10.A | Negative Ranks | 9 <sup>ae</sup>  | 5.67      | 51.00        |
|                           | Positive Ranks | 1 <sup>af</sup>  | 4.00      | 4.00         |
|                           | Ties           | 9 <sup>ag</sup>  |           |              |
|                           | Total          | 19               |           |              |
| T11SHAS10.B - T11SHAS10.A | Negative Ranks | 3 <sup>ah</sup>  | 2.00      | 6.00         |
|                           | Positive Ranks | 0 <sup>ai</sup>  | .00       | .00          |
|                           | Ties           | 15 <sup>aj</sup> |           |              |
|                           | Total          | 18               |           |              |
| T12SHAS10.B - T12SHAS10.A | Negative Ranks | 2 <sup>ak</sup>  | 1.50      | 3.00         |
|                           | Positive Ranks | 0 <sup>al</sup>  | .00       | .00          |
|                           | Ties           | 14 <sup>am</sup> |           |              |
|                           | Total          | 16               |           |              |
| T0SHAS10.C - T0SHAS10.B   | Negative Ranks | 0 <sup>an</sup>  | .00       | .00          |
|                           | Positive Ranks | 0 <sup>ao</sup>  | .00       | .00          |
|                           | Ties           | 18 <sup>ap</sup> |           |              |
|                           | Total          | 18               |           |              |
| T1SHAS10.C - T1SHAS10.B   | Negative Ranks | 0 <sup>aq</sup>  | .00       | .00          |
|                           | Positive Ranks | 0 <sup>ar</sup>  | .00       | .00          |
|                           | Ties           | 17 <sup>as</sup> |           |              |
|                           | Total          | 17               |           |              |
| T2SHAS10.C - T2SHAS10.B   | Negative Ranks | 0 <sup>at</sup>  | .00       | .00          |
|                           | Positive Ranks | 0 <sup>au</sup>  | .00       | .00          |
|                           | Ties           | 17 <sup>av</sup> |           |              |
|                           | Total          | 17               |           |              |
| T3SHAS10.C - T3SHAS10.B   | Negative Ranks | 1 <sup>aw</sup>  | 2.00      | 2.00         |
|                           | Positive Ranks | 2 <sup>ax</sup>  | 2.00      | 4.00         |

### Ranks

|                           |                | N                | Mean Rank | Sum of Ranks |
|---------------------------|----------------|------------------|-----------|--------------|
|                           | Ties           | 15 <sup>ay</sup> |           |              |
|                           | Total          | 18               |           |              |
| T4SHAS10.C - T4SHAS10.B   | Negative Ranks | 0 <sup>az</sup>  | .00       | .00          |
|                           | Positive Ranks | 7 <sup>ba</sup>  | 4.00      | 28.00        |
|                           | Ties           | 11 <sup>bb</sup> |           |              |
|                           | Total          | 18               |           |              |
| T5SHAS10.C - T5SHAS10.B   | Negative Ranks | 1 <sup>bc</sup>  | 3.50      | 3.50         |
|                           | Positive Ranks | 9 <sup>bd</sup>  | 5.72      | 51.50        |
|                           | Ties           | 8 <sup>be</sup>  |           |              |
|                           | Total          | 18               |           |              |
| T6SHAS10.C - T6SHAS10.B   | Negative Ranks | 0 <sup>bf</sup>  | .00       | .00          |
|                           | Positive Ranks | 9 <sup>bg</sup>  | 5.00      | 45.00        |
|                           | Ties           | 9 <sup>bh</sup>  |           |              |
|                           | Total          | 18               |           |              |
| T7SHAS10.C - T7SHAS10.B   | Negative Ranks | 0 <sup>bi</sup>  | .00       | .00          |
|                           | Positive Ranks | 10 <sup>bj</sup> | 5.50      | 55.00        |
|                           | Ties           | 8 <sup>bk</sup>  |           |              |
|                           | Total          | 18               |           |              |
| T8SHAS10.C - T8SHAS10.B   | Negative Ranks | 1 <sup>bl</sup>  | 2.00      | 2.00         |
|                           | Positive Ranks | 5 <sup>bm</sup>  | 3.80      | 19.00        |
|                           | Ties           | 11 <sup>bn</sup> |           |              |
|                           | Total          | 17               |           |              |
| T9SHAS10.C - T9SHAS10.B   | Negative Ranks | 0 <sup>bo</sup>  | .00       | .00          |
|                           | Positive Ranks | 6 <sup>bp</sup>  | 3.50      | 21.00        |
|                           | Ties           | 12 <sup>bq</sup> |           |              |
|                           | Total          | 18               |           |              |
| T10SHAS10.C - T10SHAS10.B | Negative Ranks | 1 <sup>br</sup>  | 3.00      | 3.00         |
|                           | Positive Ranks | 7 <sup>bs</sup>  | 4.71      | 33.00        |
|                           | Ties           | 10 <sup>bt</sup> |           |              |
|                           | Total          | 18               |           |              |
| T11SHAS10.C - T11SHAS10.B | Negative Ranks | 0 <sup>bu</sup>  | .00       | .00          |
|                           | Positive Ranks | 6 <sup>bv</sup>  | 3.50      | 21.00        |
|                           | Ties           | 10 <sup>bw</sup> |           |              |
|                           | Total          | 16               |           |              |
| T12SHAS10.C - T12SHAS10.B | Negative Ranks | 0 <sup>bx</sup>  | .00       | .00          |
|                           | Positive Ranks | 3 <sup>by</sup>  | 2.00      | 6.00         |
|                           | Ties           | 12 <sup>bz</sup> |           |              |
|                           | Total          | 15               |           |              |

### Ranks

|                             |                | N                | Mean Rank | Sum of Ranks |
|-----------------------------|----------------|------------------|-----------|--------------|
| T0SHAS10.A - T0SHAS10.<br>C | Negative Ranks | 0 <sup>ca</sup>  | .00       | .00          |
|                             | Positive Ranks | 0 <sup>cb</sup>  | .00       | .00          |
|                             | Ties           | 18 <sup>cc</sup> |           |              |
|                             | Total          | 18               |           |              |
| T1SHAS10.A - T1SHAS10.<br>C | Negative Ranks | 0 <sup>cd</sup>  | .00       | .00          |
|                             | Positive Ranks | 1 <sup>ce</sup>  | 1.00      | 1.00         |
|                             | Ties           | 15 <sup>cf</sup> |           |              |
|                             | Total          | 16               |           |              |
| T2SHAS10.A - T2SHAS10.<br>C | Negative Ranks | 0 <sup>cg</sup>  | .00       | .00          |
|                             | Positive Ranks | 2 <sup>ch</sup>  | 1.50      | 3.00         |
|                             | Ties           | 14 <sup>ci</sup> |           |              |
|                             | Total          | 16               |           |              |
| T3SHAS10.A - T3SHAS10.<br>C | Negative Ranks | 1 <sup>cj</sup>  | 2.00      | 2.00         |
|                             | Positive Ranks | 2 <sup>ck</sup>  | 2.00      | 4.00         |
|                             | Ties           | 15 <sup>cl</sup> |           |              |
|                             | Total          | 18               |           |              |
| T4SHAS10.A - T4SHAS10.<br>C | Negative Ranks | 4 <sup>cm</sup>  | 5.88      | 23.50        |
|                             | Positive Ranks | 5 <sup>cn</sup>  | 4.30      | 21.50        |
|                             | Ties           | 9 <sup>co</sup>  |           |              |
|                             | Total          | 18               |           |              |
| T5SHAS10.A - T5SHAS10.<br>C | Negative Ranks | 1 <sup>cp</sup>  | 4.50      | 4.50         |
|                             | Positive Ranks | 7 <sup>cq</sup>  | 4.50      | 31.50        |
|                             | Ties           | 10 <sup>cr</sup> |           |              |
|                             | Total          | 18               |           |              |
| T6SHAS10.A - T6SHAS10.<br>C | Negative Ranks | 7 <sup>cs</sup>  | 5.93      | 41.50        |
|                             | Positive Ranks | 3 <sup>ct</sup>  | 4.50      | 13.50        |
|                             | Ties           | 8 <sup>cu</sup>  |           |              |
|                             | Total          | 18               |           |              |
| T7SHAS10.A - T7SHAS10.<br>C | Negative Ranks | 3 <sup>cv</sup>  | 4.00      | 12.00        |
|                             | Positive Ranks | 3 <sup>cw</sup>  | 3.00      | 9.00         |
|                             | Ties           | 12 <sup>cx</sup> |           |              |
|                             | Total          | 18               |           |              |
| T8SHAS10.A - T8SHAS10.<br>C | Negative Ranks | 4 <sup>cy</sup>  | 6.63      | 26.50        |
|                             | Positive Ranks | 5 <sup>cz</sup>  | 3.70      | 18.50        |
|                             | Ties           | 9 <sup>da</sup>  |           |              |
|                             | Total          | 18               |           |              |
| T9SHAS10.A - T9SHAS10.<br>C | Negative Ranks | 6 <sup>db</sup>  | 4.50      | 27.00        |
|                             | Positive Ranks | 3 <sup>dc</sup>  | 6.00      | 18.00        |

### Ranks

|                           |                | N                | Mean Rank | Sum of Ranks |
|---------------------------|----------------|------------------|-----------|--------------|
|                           | Ties           | 9 <sup>dd</sup>  |           |              |
|                           | Total          | 18               |           |              |
| T10SHAS10.A - T10SHAS10.C | Negative Ranks | 3 <sup>de</sup>  | 3.33      | 10.00        |
|                           | Positive Ranks | 2 <sup>df</sup>  | 2.50      | 5.00         |
|                           | Ties           | 13 <sup>dg</sup> |           |              |
|                           | Total          | 18               |           |              |
| T11SHAS10.A - T11SHAS10.C | Negative Ranks | 7 <sup>dh</sup>  | 5.29      | 37.00        |
|                           | Positive Ranks | 2 <sup>di</sup>  | 4.00      | 8.00         |
|                           | Ties           | 8 <sup>dj</sup>  |           |              |
|                           | Total          | 17               |           |              |
| T12SHAS10.A - T12SHAS10.C | Negative Ranks | 4 <sup>dk</sup>  | 3.00      | 12.00        |
|                           | Positive Ranks | 1 <sup>dl</sup>  | 3.00      | 3.00         |
|                           | Ties           | 11 <sup>dm</sup> |           |              |
|                           | Total          | 16               |           |              |

- a. T0SHAS10.B < T0SHAS10.A
- b. T0SHAS10.B > T0SHAS10.A
- c. T0SHAS10.B = T0SHAS10.A
- d. T1SHAS10.B < T1SHAS10.A
- e. T1SHAS10.B > T1SHAS10.A
- f. T1SHAS10.B = T1SHAS10.A
- g. T2SHAS10.B < T2SHAS10.A
- h. T2SHAS10.B > T2SHAS10.A
- i. T2SHAS10.B = T2SHAS10.A
- j. T3SHAS10.B < T3SHAS10.A
- k. T3SHAS10.B > T3SHAS10.A
- l. T3SHAS10.B = T3SHAS10.A
- m. T4SHAS10.B < T4SHAS10.A
- n. T4SHAS10.B > T4SHAS10.A
- o. T4SHAS10.B = T4SHAS10.A

p. T5SHAS10.B < T5SHAS10.A  
q. T5SHAS10.B > T5SHAS10.A  
r. T5SHAS10.B = T5SHAS10.A  
s. T6SHAS10.B < T6SHAS10.A  
t. T6SHAS10.B > T6SHAS10.A  
u. T6SHAS10.B = T6SHAS10.A  
v. T7SHAS10.B < T7SHAS10.A  
w. T7SHAS10.B > T7SHAS10.A  
x. T7SHAS10.B = T7SHAS10.A  
y. T8SHAS10.B < T8SHAS10.A  
z. T8SHAS10.B > T8SHAS10.A  
aa. T8SHAS10.B = T8SHAS10.A  
ab. T9SHAS10.B < T9SHAS10.A  
ac. T9SHAS10.B > T9SHAS10.A  
ad. T9SHAS10.B = T9SHAS10.A  
ae. T10SHAS10.B < T10SHAS10.A  
af. T10SHAS10.B > T10SHAS10.A  
ag. T10SHAS10.B = T10SHAS10.A  
ah. T11SHAS10.B < T11SHAS10.A  
ai. T11SHAS10.B > T11SHAS10.A  
aj. T11SHAS10.B = T11SHAS10.A  
ak. T12SHAS10.B < T12SHAS10.A  
al. T12SHAS10.B > T12SHAS10.A  
am. T12SHAS10.B = T12SHAS10.A  
an. T0SHAS10.C < T0SHAS10.B  
ao. T0SHAS10.C > T0SHAS10.B  
ap. T0SHAS10.C = T0SHAS10.B  
aq. T1SHAS10.C < T1SHAS10.B  
ar. T1SHAS10.C > T1SHAS10.B  
as. T1SHAS10.C = T1SHAS10.B  
at. T2SHAS10.C < T2SHAS10.B  
au. T2SHAS10.C > T2SHAS10.B  
av. T2SHAS10.C = T2SHAS10.B  
aw. T3SHAS10.C < T3SHAS10.B  
ax. T3SHAS10.C > T3SHAS10.B  
ay. T3SHAS10.C = T3SHAS10.B  
az. T4SHAS10.C < T4SHAS10.B  
ba. T4SHAS10.C > T4SHAS10.B  
bb. T4SHAS10.C = T4SHAS10.B  
bc. T5SHAS10.C < T5SHAS10.B  
bd. T5SHAS10.C > T5SHAS10.B  
be. T5SHAS10.C = T5SHAS10.B  
bf. T6SHAS10.C < T6SHAS10.B  
bg. T6SHAS10.C > T6SHAS10.B  
bh. T6SHAS10.C = T6SHAS10.B

bh. T6SHAS10.C = T6SHAS10.B  
bi. T7SHAS10.C < T7SHAS10.B  
bj. T7SHAS10.C > T7SHAS10.B  
bk. T7SHAS10.C = T7SHAS10.B  
bl. T8SHAS10.C < T8SHAS10.B  
bm. T8SHAS10.C > T8SHAS10.B  
bn. T8SHAS10.C = T8SHAS10.B  
bo. T9SHAS10.C < T9SHAS10.B  
bp. T9SHAS10.C > T9SHAS10.B  
bq. T9SHAS10.C = T9SHAS10.B  
br. T10SHAS10.C < T10SHAS10.B  
bs. T10SHAS10.C > T10SHAS10.B  
bt. T10SHAS10.C = T10SHAS10.B  
bu. T11SHAS10.C < T11SHAS10.B  
bv. T11SHAS10.C > T11SHAS10.B  
bw. T11SHAS10.C = T11SHAS10.B  
bx. T12SHAS10.C < T12SHAS10.B  
by. T12SHAS10.C > T12SHAS10.B  
bz. T12SHAS10.C = T12SHAS10.B  
ca. T0SHAS10.A < T0SHAS10.C  
cb. T0SHAS10.A > T0SHAS10.C  
cc. T0SHAS10.A = T0SHAS10.C  
cd. T1SHAS10.A < T1SHAS10.C  
ce. T1SHAS10.A > T1SHAS10.C  
cf. T1SHAS10.A = T1SHAS10.C  
cg. T2SHAS10.A < T2SHAS10.C  
ch. T2SHAS10.A > T2SHAS10.C  
ci. T2SHAS10.A = T2SHAS10.C  
cj. T3SHAS10.A < T3SHAS10.C  
ck. T3SHAS10.A > T3SHAS10.C  
cl. T3SHAS10.A = T3SHAS10.C  
cm. T4SHAS10.A < T4SHAS10.C  
cn. T4SHAS10.A > T4SHAS10.C  
co. T4SHAS10.A = T4SHAS10.C  
cp. T5SHAS10.A < T5SHAS10.C  
cq. T5SHAS10.A > T5SHAS10.C  
cr. T5SHAS10.A = T5SHAS10.C  
cs. T6SHAS10.A < T6SHAS10.C  
ct. T6SHAS10.A > T6SHAS10.C  
cu. T6SHAS10.A = T6SHAS10.C  
cv. T7SHAS10.A < T7SHAS10.C  
cw. T7SHAS10.A > T7SHAS10.C  
cx. T7SHAS10.A = T7SHAS10.C  
cy. T8SHAS10.A < T8SHAS10.C  
-- T8SHAS10.A > T8SHAS10.C

- cz. T8SHAS10.A > T8SHAS10.C
- da. T8SHAS10.A = T8SHAS10.C
- db. T9SHAS10.A < T9SHAS10.C
- dc. T9SHAS10.A > T9SHAS10.C
- dd. T9SHAS10.A = T9SHAS10.C
- de. T10SHAS10.A < T10SHAS10.C
- df. T10SHAS10.A > T10SHAS10.C
- dg. T10SHAS10.A = T10SHAS10.C
- dh. T11SHAS10.A < T11SHAS10.C
- di. T11SHAS10.A > T11SHAS10.C
- dj. T11SHAS10.A = T11SHAS10.C
- dk. T12SHAS10.A < T12SHAS10.C
- dl. T12SHAS10.A > T12SHAS10.C
- dm. T12SHAS10.A = T12SHAS10.C

**Test Statistics<sup>a</sup>**

|                        | T0SHAS10.B -<br>T0SHAS10.A | T1SHAS10.B -<br>T1SHAS10.A | T2SHAS10.B -<br>T2SHAS10.A | T3SHAS10.B -<br>T3SHAS10.A |
|------------------------|----------------------------|----------------------------|----------------------------|----------------------------|
| Z                      | .000 <sup>b</sup>          | -1.000 <sup>c</sup>        | -1.342 <sup>c</sup>        | -.816 <sup>c</sup>         |
| Asymp. Sig. (2-tailed) | 1.000                      | .317                       | .180                       | .414                       |

**Test Statistics<sup>a</sup>**

|                        | T4SHAS10.B -<br>T4SHAS10.A | T5SHAS10.B -<br>T5SHAS10.A | T6SHAS10.B -<br>T6SHAS10.A | T7SHAS10.B -<br>T7SHAS10.A |
|------------------------|----------------------------|----------------------------|----------------------------|----------------------------|
| Z                      | -2.251 <sup>c</sup>        | -3.209 <sup>c</sup>        | -2.170 <sup>c</sup>        | -3.020 <sup>c</sup>        |
| Asymp. Sig. (2-tailed) | .024                       | .001                       | .030                       | .003                       |

**Test Statistics<sup>a</sup>**

|                        | T8SHAS10.B -<br>T8SHAS10.A | T9SHAS10.B -<br>T9SHAS10.A | T10SHAS10.B -<br>T10SHAS10.A | T11SHAS10.B -<br>T11SHAS10.A |
|------------------------|----------------------------|----------------------------|------------------------------|------------------------------|
| Z                      | -2.636 <sup>c</sup>        | -2.511 <sup>c</sup>        | -2.489 <sup>c</sup>          | -1.633 <sup>c</sup>          |
| Asymp. Sig. (2-tailed) | .008                       | .012                       | .013                         | .102                         |

**Test Statistics<sup>a</sup>**

|                        | T12SHAS10.B -<br>T12SHAS10.A | T0SHAS10.C -<br>T0SHAS10.B | T1SHAS10.C -<br>T1SHAS10.B | T2SHAS10.C -<br>T2SHAS10.B |
|------------------------|------------------------------|----------------------------|----------------------------|----------------------------|
| Z                      | -1.342 <sup>c</sup>          | .000 <sup>b</sup>          | .000 <sup>b</sup>          | .000 <sup>b</sup>          |
| Asymp. Sig. (2-tailed) | .180                         | 1.000                      | 1.000                      | 1.000                      |

**Test Statistics<sup>a</sup>**

|                        | T3SHAS10.C - T3SHAS10.B | T4SHAS10.C - T4SHAS10.B | T5SHAS10.C - T5SHAS10.B | T6SHAS10.C - T6SHAS10.B |
|------------------------|-------------------------|-------------------------|-------------------------|-------------------------|
| Z                      | -.577 <sup>d</sup>      | -2.456 <sup>d</sup>     | -2.511 <sup>d</sup>     | -2.694 <sup>d</sup>     |
| Asymp. Sig. (2-tailed) | .564                    | .014                    | .012                    | .007                    |

**Test Statistics<sup>a</sup>**

|                        | T7SHAS10.C - T7SHAS10.B | T8SHAS10.C - T8SHAS10.B | T9SHAS10.C - T9SHAS10.B | T10SHAS10.C - T10SHAS10.B |
|------------------------|-------------------------|-------------------------|-------------------------|---------------------------|
| Z                      | -2.877 <sup>d</sup>     | -1.802 <sup>d</sup>     | -2.220 <sup>d</sup>     | -2.157 <sup>d</sup>       |
| Asymp. Sig. (2-tailed) | .004                    | .072                    | .026                    | .031                      |

**Test Statistics<sup>a</sup>**

|                        | T11SHAS10.C - T11SHAS10.B | T12SHAS10.C - T12SHAS10.B | T0SHAS10.A - T0SHAS10.C | T1SHAS10.A - T1SHAS10.C |
|------------------------|---------------------------|---------------------------|-------------------------|-------------------------|
| Z                      | -2.271 <sup>d</sup>       | -1.732 <sup>d</sup>       | .000 <sup>b</sup>       | -1.000 <sup>d</sup>     |
| Asymp. Sig. (2-tailed) | .023                      | .083                      | 1.000                   | .317                    |

**Test Statistics<sup>a</sup>**

|                        | T2SHAS10.A - T2SHAS10.C | T3SHAS10.A - T3SHAS10.C | T4SHAS10.A - T4SHAS10.C | T5SHAS10.A - T5SHAS10.C |
|------------------------|-------------------------|-------------------------|-------------------------|-------------------------|
| Z                      | -1.342 <sup>d</sup>     | -.577 <sup>d</sup>      | -.122 <sup>c</sup>      | -2.121 <sup>d</sup>     |
| Asymp. Sig. (2-tailed) | .180                    | .564                    | .903                    | .034                    |

**Test Statistics<sup>a</sup>**

|                        | T6SHAS10.A - T6SHAS10.C | T7SHAS10.A - T7SHAS10.C | T8SHAS10.A - T8SHAS10.C | T9SHAS10.A - T9SHAS10.C |
|------------------------|-------------------------|-------------------------|-------------------------|-------------------------|
| Z                      | -1.456 <sup>c</sup>     | -.333 <sup>c</sup>      | -.483 <sup>c</sup>      | -.577 <sup>c</sup>      |
| Asymp. Sig. (2-tailed) | .145                    | .739                    | .629                    | .564                    |

**Test Statistics<sup>a</sup>**

|                        | T10SHAS10.A - T10SHAS10.C | T11SHAS10.A - T11SHAS10.C | T12SHAS10.A - T12SHAS10.C |
|------------------------|---------------------------|---------------------------|---------------------------|
| Z                      | -.707 <sup>c</sup>        | -1.811 <sup>c</sup>       | -1.342 <sup>c</sup>       |
| Asymp. Sig. (2-tailed) | .480                      | .070                      | .180                      |

a. Wilcoxon Signed Ranks Test

b. The sum of negative ranks equals the sum of positive ranks.

c. Based on positive ranks.

d. Based on negative ranks.

## Notes

Syntax

```
NPART TESTS
/WILCOXON=T0SHAS12.
A T1SHAS12.A
T2SHAS12.A T3SHAS12.
A T4SHAS12.A
T5SHAS12.A T6SHAS12.
A T7SHAS12.A
T8SHAS12.A T9SHAS12.
A T10SHAS12.A
  T11SHAS12.A
T12SHAS12.A
  T0SHAS12.B
T1SHAS12.B T2SHAS12.B
T3SHAS12.B T4SHAS12.B
T5SHAS12.B T6SHAS12.B
T7SHAS12.B T8SHAS12.B
T9SHAS12.B T10SHAS12.
B
  T11SHAS12.B
T12SHAS12.B
  T0SHAS12.C
T1SHAS12.C T2SHAS12.
C T3SHAS12.C
T4SHAS12.C T5SHAS12.
C T6SHAS12.C
T7SHAS12.C T8SHAS12.
C T9SHAS12.C
T10SHAS12.C
  T11SHAS12.C
T12SHAS12.C
  WITH
  T0SHAS12.B
T1SHAS12.B T2SHAS12.B
T3SHAS12.B T4SHAS12.B
T5SHAS12.B T6SHAS12.B
T7SHAS12.B T8SHAS12.B
T9SHAS12.B T10SHAS12.
B
  T11SHAS12.B
T12SHAS12.B
  T0SHAS12.C
T1SHAS12.C T2SHAS12.
C T3SHAS12.C
T4SHAS12.C T5SHAS12.
C T6SHAS12.C
T7SHAS12.C T8SHAS12.
C T9SHAS12.C
T10SHAS12.C
  T11SHAS12.C
T12SHAS12.C
  T0SHAS12.A
T1SHAS12.A T2SHAS12.
A T3SHAS12.A
T4SHAS12.A T5SHAS12.
A T6SHAS12.A
T7SHAS12.A T8SHAS12.
A T9SHAS12.A
T10SHAS12.A
  T11SHAS12.A
T12SHAS12.A (PAIRED)
/STATISTICS
DESCRIPTIVES
/MISSING ANALYSIS.
```

### Notes

|           |                                      |             |
|-----------|--------------------------------------|-------------|
| Resources | Processor Time                       | 00:00:00.06 |
|           | Elapsed Time                         | 00:00:00.00 |
|           | Number of Cases Allowed <sup>a</sup> | 71493       |

a. Based on availability of workspace memory.

### Descriptive Statistics

|             | N  | Mean | Std. Deviation | Minimum | Maximum |
|-------------|----|------|----------------|---------|---------|
| T0SHAS12.A  | 19 | 1.16 | .375           | 1       | 2       |
| T1SHAS12.A  | 16 | 1.25 | .447           | 1       | 2       |
| T2SHAS12.A  | 17 | 1.24 | .437           | 1       | 2       |
| T3SHAS12.A  | 19 | 1.42 | .769           | 1       | 3       |
| T4SHAS12.A  | 19 | 1.63 | .831           | 1       | 4       |
| T5SHAS12.A  | 19 | 1.84 | 1.068          | 1       | 4       |
| T6SHAS12.A  | 19 | 2.42 | 1.805          | 1       | 8       |
| T7SHAS12.A  | 19 | 2.37 | 2.060          | 1       | 9       |
| T8SHAS12.A  | 19 | 2.37 | 1.832          | 1       | 8       |
| T9SHAS12.A  | 19 | 1.68 | 1.416          | 1       | 7       |
| T10SHAS12.A | 19 | 1.84 | 1.302          | 1       | 6       |
| T11SHAS12.A | 19 | 1.68 | 1.455          | 1       | 7       |
| T12SHAS12.A | 18 | 1.67 | 1.328          | 1       | 5       |
| T0SHAS12.B  | 19 | 1.16 | .375           | 1       | 2       |
| T1SHAS12.B  | 18 | 1.11 | .323           | 1       | 2       |
| T2SHAS12.B  | 19 | 1.11 | .315           | 1       | 2       |
| T3SHAS12.B  | 19 | 1.16 | .375           | 1       | 2       |
| T4SHAS12.B  | 19 | 1.16 | .375           | 1       | 2       |
| T5SHAS12.B  | 19 | 1.37 | .597           | 1       | 3       |
| T6SHAS12.B  | 19 | 1.32 | .671           | 1       | 3       |
| T7SHAS12.B  | 19 | 1.37 | .684           | 1       | 3       |
| T8SHAS12.B  | 18 | 1.28 | .575           | 1       | 3       |
| T9SHAS12.B  | 19 | 1.21 | .419           | 1       | 2       |
| T10SHAS12.B | 19 | 1.26 | .452           | 1       | 2       |
| T11SHAS12.B | 18 | 1.39 | .778           | 1       | 4       |
| T12SHAS12.B | 17 | 1.18 | .393           | 1       | 2       |
| T0SHAS12.C  | 18 | 1.00 | .000           | 1       | 1       |
| T1SHAS12.C  | 18 | 1.06 | .236           | 1       | 2       |
| T2SHAS12.C  | 17 | 1.06 | .243           | 1       | 2       |
| T3SHAS12.C  | 18 | 1.17 | .383           | 1       | 2       |
| T4SHAS12.C  | 18 | 1.67 | .907           | 1       | 4       |
| T5SHAS12.C  | 18 | 2.11 | 1.079          | 1       | 4       |
| T6SHAS12.C  | 18 | 2.17 | 1.543          | 1       | 6       |

### Descriptive Statistics

|             | N  | Mean | Std. Deviation | Minimum | Maximum |
|-------------|----|------|----------------|---------|---------|
| T7SHAS12.C  | 18 | 2.17 | 1.618          | 1       | 7       |
| T8SHAS12.C  | 18 | 1.94 | 1.552          | 1       | 7       |
| T9SHAS12.C  | 18 | 1.72 | .958           | 1       | 4       |
| T10SHAS12.C | 18 | 1.56 | .705           | 1       | 3       |
| T11SHAS12.C | 17 | 1.53 | .874           | 1       | 4       |
| T12SHAS12.C | 17 | 1.35 | .606           | 1       | 3       |

### Wilcoxon Signed Ranks Test

#### Ranks

|                         |                | N               | Mean Rank | Sum of Ranks |
|-------------------------|----------------|-----------------|-----------|--------------|
| T0SHAS12.B - T0SHAS12.A | Negative Ranks | 1 <sup>a</sup>  | 1.50      | 1.50         |
|                         | Positive Ranks | 1 <sup>b</sup>  | 1.50      | 1.50         |
|                         | Ties           | 17 <sup>c</sup> |           |              |
|                         | Total          | 19              |           |              |
| T1SHAS12.B - T1SHAS12.A | Negative Ranks | 3 <sup>d</sup>  | 2.00      | 6.00         |
|                         | Positive Ranks | 0 <sup>e</sup>  | .00       | .00          |
|                         | Ties           | 12 <sup>f</sup> |           |              |
|                         | Total          | 15              |           |              |
| T2SHAS12.B - T2SHAS12.A | Negative Ranks | 2 <sup>g</sup>  | 1.50      | 3.00         |
|                         | Positive Ranks | 0 <sup>h</sup>  | .00       | .00          |
|                         | Ties           | 15 <sup>i</sup> |           |              |
|                         | Total          | 17              |           |              |
| T3SHAS12.B - T3SHAS12.A | Negative Ranks | 4 <sup>j</sup>  | 3.25      | 13.00        |
|                         | Positive Ranks | 1 <sup>k</sup>  | 2.00      | 2.00         |
|                         | Ties           | 14 <sup>l</sup> |           |              |
|                         | Total          | 19              |           |              |
| T4SHAS12.B - T4SHAS12.A | Negative Ranks | 7 <sup>m</sup>  | 4.00      | 28.00        |
|                         | Positive Ranks | 0 <sup>n</sup>  | .00       | .00          |
|                         | Ties           | 12 <sup>o</sup> |           |              |
|                         | Total          | 19              |           |              |
| T5SHAS12.B - T5SHAS12.A | Negative Ranks | 7 <sup>p</sup>  | 5.14      | 36.00        |
|                         | Positive Ranks | 2 <sup>q</sup>  | 4.50      | 9.00         |
|                         | Ties           | 10 <sup>r</sup> |           |              |
|                         | Total          | 19              |           |              |
| T6SHAS12.B - T6SHAS12.A | Negative Ranks | 10 <sup>s</sup> | 5.50      | 55.00        |
|                         | Positive Ranks | 0 <sup>t</sup>  | .00       | .00          |
|                         | Ties           | 9 <sup>u</sup>  |           |              |
|                         | Total          | 19              |           |              |

### Ranks

|                           |                | N                | Mean Rank | Sum of Ranks |
|---------------------------|----------------|------------------|-----------|--------------|
| T7SHAS12.B - T7SHAS12.A   | Negative Ranks | 8 <sup>v</sup>   | 5.25      | 42.00        |
|                           | Positive Ranks | 1 <sup>w</sup>   | 3.00      | 3.00         |
|                           | Ties           | 10 <sup>x</sup>  |           |              |
|                           | Total          | 19               |           |              |
| T8SHAS12.B - T8SHAS12.A   | Negative Ranks | 10 <sup>y</sup>  | 5.50      | 55.00        |
|                           | Positive Ranks | 0 <sup>z</sup>   | .00       | .00          |
|                           | Ties           | 8 <sup>aa</sup>  |           |              |
|                           | Total          | 18               |           |              |
| T9SHAS12.B - T9SHAS12.A   | Negative Ranks | 6 <sup>ab</sup>  | 4.67      | 28.00        |
|                           | Positive Ranks | 2 <sup>ac</sup>  | 4.00      | 8.00         |
|                           | Ties           | 11 <sup>ad</sup> |           |              |
|                           | Total          | 19               |           |              |
| T10SHAS12.B - T10SHAS12.A | Negative Ranks | 7 <sup>ae</sup>  | 4.64      | 32.50        |
|                           | Positive Ranks | 1 <sup>af</sup>  | 3.50      | 3.50         |
|                           | Ties           | 11 <sup>ag</sup> |           |              |
|                           | Total          | 19               |           |              |
| T11SHAS12.B - T11SHAS12.A | Negative Ranks | 3 <sup>ah</sup>  | 3.33      | 10.00        |
|                           | Positive Ranks | 2 <sup>ai</sup>  | 2.50      | 5.00         |
|                           | Ties           | 13 <sup>aj</sup> |           |              |
|                           | Total          | 18               |           |              |
| T12SHAS12.B - T12SHAS12.A | Negative Ranks | 3 <sup>ak</sup>  | 3.67      | 11.00        |
|                           | Positive Ranks | 2 <sup>al</sup>  | 2.00      | 4.00         |
|                           | Ties           | 11 <sup>am</sup> |           |              |
|                           | Total          | 16               |           |              |
| T0SHAS12.C - T0SHAS12.B   | Negative Ranks | 3 <sup>an</sup>  | 2.00      | 6.00         |
|                           | Positive Ranks | 0 <sup>ao</sup>  | .00       | .00          |
|                           | Ties           | 15 <sup>ap</sup> |           |              |
|                           | Total          | 18               |           |              |
| T1SHAS12.C - T1SHAS12.B   | Negative Ranks | 2 <sup>aq</sup>  | 2.00      | 4.00         |
|                           | Positive Ranks | 1 <sup>ar</sup>  | 2.00      | 2.00         |
|                           | Ties           | 14 <sup>as</sup> |           |              |
|                           | Total          | 17               |           |              |
| T2SHAS12.C - T2SHAS12.B   | Negative Ranks | 2 <sup>at</sup>  | 2.00      | 4.00         |
|                           | Positive Ranks | 1 <sup>au</sup>  | 2.00      | 2.00         |
|                           | Ties           | 14 <sup>av</sup> |           |              |
|                           | Total          | 17               |           |              |
| T3SHAS12.C - T3SHAS12.B   | Negative Ranks | 2 <sup>aw</sup>  | 2.50      | 5.00         |
|                           | Positive Ranks | 2 <sup>ax</sup>  | 2.50      | 5.00         |

### Ranks

|                           |                | N                | Mean Rank | Sum of Ranks |
|---------------------------|----------------|------------------|-----------|--------------|
|                           | Ties           | 14 <sup>ay</sup> |           |              |
|                           | Total          | 18               |           |              |
| T4SHAS12.C - T4SHAS12.B   | Negative Ranks | 2 <sup>az</sup>  | 4.50      | 9.00         |
|                           | Positive Ranks | 8 <sup>ba</sup>  | 5.75      | 46.00        |
|                           | Ties           | 8 <sup>bb</sup>  |           |              |
|                           | Total          | 18               |           |              |
|                           |                |                  |           |              |
| T5SHAS12.C - T5SHAS12.B   | Negative Ranks | 1 <sup>bc</sup>  | 2.50      | 2.50         |
|                           | Positive Ranks | 8 <sup>bd</sup>  | 5.31      | 42.50        |
|                           | Ties           | 9 <sup>be</sup>  |           |              |
|                           | Total          | 18               |           |              |
| T6SHAS12.C - T6SHAS12.B   | Negative Ranks | 0 <sup>bf</sup>  | .00       | .00          |
|                           | Positive Ranks | 9 <sup>bg</sup>  | 5.00      | 45.00        |
|                           | Ties           | 9 <sup>bh</sup>  |           |              |
|                           | Total          | 18               |           |              |
| T7SHAS12.C - T7SHAS12.B   | Negative Ranks | 0 <sup>bi</sup>  | .00       | .00          |
|                           | Positive Ranks | 9 <sup>bj</sup>  | 5.00      | 45.00        |
|                           | Ties           | 9 <sup>bk</sup>  |           |              |
|                           | Total          | 18               |           |              |
| T8SHAS12.C - T8SHAS12.B   | Negative Ranks | 1 <sup>bl</sup>  | 2.00      | 2.00         |
|                           | Positive Ranks | 6 <sup>bm</sup>  | 4.33      | 26.00        |
|                           | Ties           | 10 <sup>bn</sup> |           |              |
|                           | Total          | 17               |           |              |
| T9SHAS12.C - T9SHAS12.B   | Negative Ranks | 0 <sup>bo</sup>  | .00       | .00          |
|                           | Positive Ranks | 6 <sup>bp</sup>  | 3.50      | 21.00        |
|                           | Ties           | 12 <sup>bq</sup> |           |              |
|                           | Total          | 18               |           |              |
| T10SHAS12.C - T10SHAS12.B | Negative Ranks | 1 <sup>br</sup>  | 3.00      | 3.00         |
|                           | Positive Ranks | 5 <sup>bs</sup>  | 3.60      | 18.00        |
|                           | Ties           | 12 <sup>bt</sup> |           |              |
|                           | Total          | 18               |           |              |
| T11SHAS12.C - T11SHAS12.B | Negative Ranks | 2 <sup>bu</sup>  | 3.50      | 7.00         |
|                           | Positive Ranks | 4 <sup>bv</sup>  | 3.50      | 14.00        |
|                           | Ties           | 10 <sup>bw</sup> |           |              |
|                           | Total          | 16               |           |              |
| T12SHAS12.C - T12SHAS12.B | Negative Ranks | 2 <sup>bx</sup>  | 3.00      | 6.00         |
|                           | Positive Ranks | 3 <sup>by</sup>  | 3.00      | 9.00         |
|                           | Ties           | 10 <sup>bz</sup> |           |              |
|                           | Total          | 15               |           |              |

### Ranks

|                         |                | N                | Mean Rank | Sum of Ranks |
|-------------------------|----------------|------------------|-----------|--------------|
| T0SHAS12.A - T0SHAS12.C | Negative Ranks | 0 <sup>ca</sup>  | .00       | .00          |
|                         | Positive Ranks | 3 <sup>cb</sup>  | 2.00      | 6.00         |
|                         | Ties           | 15 <sup>cc</sup> |           |              |
|                         | Total          | 18               |           |              |
| T1SHAS12.A - T1SHAS12.C | Negative Ranks | 0 <sup>cd</sup>  | .00       | .00          |
|                         | Positive Ranks | 3 <sup>ce</sup>  | 2.00      | 6.00         |
|                         | Ties           | 13 <sup>cf</sup> |           |              |
|                         | Total          | 16               |           |              |
| T2SHAS12.A - T2SHAS12.C | Negative Ranks | 0 <sup>cg</sup>  | .00       | .00          |
|                         | Positive Ranks | 3 <sup>ch</sup>  | 2.00      | 6.00         |
|                         | Ties           | 13 <sup>ci</sup> |           |              |
|                         | Total          | 16               |           |              |
| T3SHAS12.A - T3SHAS12.C | Negative Ranks | 1 <sup>cj</sup>  | 3.00      | 3.00         |
|                         | Positive Ranks | 5 <sup>ck</sup>  | 3.60      | 18.00        |
|                         | Ties           | 12 <sup>cl</sup> |           |              |
|                         | Total          | 18               |           |              |
| T4SHAS12.A - T4SHAS12.C | Negative Ranks | 3 <sup>cm</sup>  | 5.33      | 16.00        |
|                         | Positive Ranks | 5 <sup>cn</sup>  | 4.00      | 20.00        |
|                         | Ties           | 10 <sup>co</sup> |           |              |
|                         | Total          | 18               |           |              |
| T5SHAS12.A - T5SHAS12.C | Negative Ranks | 6 <sup>cp</sup>  | 5.75      | 34.50        |
|                         | Positive Ranks | 3 <sup>cq</sup>  | 3.50      | 10.50        |
|                         | Ties           | 9 <sup>cr</sup>  |           |              |
|                         | Total          | 18               |           |              |
| T6SHAS12.A - T6SHAS12.C | Negative Ranks | 4 <sup>cs</sup>  | 5.88      | 23.50        |
|                         | Positive Ranks | 5 <sup>ct</sup>  | 4.30      | 21.50        |
|                         | Ties           | 9 <sup>cu</sup>  |           |              |
|                         | Total          | 18               |           |              |
| T7SHAS12.A - T7SHAS12.C | Negative Ranks | 4 <sup>cv</sup>  | 4.38      | 17.50        |
|                         | Positive Ranks | 3 <sup>cw</sup>  | 3.50      | 10.50        |
|                         | Ties           | 11 <sup>cx</sup> |           |              |
|                         | Total          | 18               |           |              |
| T8SHAS12.A - T8SHAS12.C | Negative Ranks | 3 <sup>cy</sup>  | 5.33      | 16.00        |
|                         | Positive Ranks | 5 <sup>cz</sup>  | 4.00      | 20.00        |
|                         | Ties           | 10 <sup>da</sup> |           |              |
|                         | Total          | 18               |           |              |
| T9SHAS12.A - T9SHAS12.C | Negative Ranks | 5 <sup>db</sup>  | 3.00      | 15.00        |
|                         | Positive Ranks | 0 <sup>dc</sup>  | .00       | .00          |

### Ranks

|                              |                | N                | Mean Rank | Sum of Ranks |
|------------------------------|----------------|------------------|-----------|--------------|
|                              | Ties           | 13 <sup>dd</sup> |           |              |
|                              | Total          | 18               |           |              |
| T10SHAS12.A -<br>T10SHAS12.C | Negative Ranks | 2 <sup>de</sup>  | 2.00      | 4.00         |
|                              | Positive Ranks | 2 <sup>df</sup>  | 3.00      | 6.00         |
|                              | Ties           | 14 <sup>dg</sup> |           |              |
|                              | Total          | 18               |           |              |
| T11SHAS12.A -<br>T11SHAS12.C | Negative Ranks | 4 <sup>dh</sup>  | 3.50      | 14.00        |
|                              | Positive Ranks | 2 <sup>di</sup>  | 3.50      | 7.00         |
|                              | Ties           | 11 <sup>dj</sup> |           |              |
|                              | Total          | 17               |           |              |
| T12SHAS12.A -<br>T12SHAS12.C | Negative Ranks | 2 <sup>dk</sup>  | 2.00      | 4.00         |
|                              | Positive Ranks | 2 <sup>dl</sup>  | 3.00      | 6.00         |
|                              | Ties           | 12 <sup>dm</sup> |           |              |
|                              | Total          | 16               |           |              |

- a. T0SHAS12.B < T0SHAS12.A
- b. T0SHAS12.B > T0SHAS12.A
- c. T0SHAS12.B = T0SHAS12.A
- d. T1SHAS12.B < T1SHAS12.A
- e. T1SHAS12.B > T1SHAS12.A
- f. T1SHAS12.B = T1SHAS12.A
- g. T2SHAS12.B < T2SHAS12.A
- h. T2SHAS12.B > T2SHAS12.A
- i. T2SHAS12.B = T2SHAS12.A
- j. T3SHAS12.B < T3SHAS12.A
- k. T3SHAS12.B > T3SHAS12.A
- l. T3SHAS12.B = T3SHAS12.A
- m. T4SHAS12.B < T4SHAS12.A
- n. T4SHAS12.B > T4SHAS12.A
- o. T4SHAS12.B = T4SHAS12.A
- p. T5SHAS12.B < T5SHAS12.A

p. T5SHAS12.B < T5SHAS12.A  
q. T5SHAS12.B > T5SHAS12.A  
r. T5SHAS12.B = T5SHAS12.A  
s. T6SHAS12.B < T6SHAS12.A  
t. T6SHAS12.B > T6SHAS12.A  
u. T6SHAS12.B = T6SHAS12.A  
v. T7SHAS12.B < T7SHAS12.A  
w. T7SHAS12.B > T7SHAS12.A  
x. T7SHAS12.B = T7SHAS12.A  
y. T8SHAS12.B < T8SHAS12.A  
z. T8SHAS12.B > T8SHAS12.A  
aa. T8SHAS12.B = T8SHAS12.A  
ab. T9SHAS12.B < T9SHAS12.A  
ac. T9SHAS12.B > T9SHAS12.A  
ad. T9SHAS12.B = T9SHAS12.A  
ae. T10SHAS12.B < T10SHAS12.A  
af. T10SHAS12.B > T10SHAS12.A  
ag. T10SHAS12.B = T10SHAS12.A  
ah. T11SHAS12.B < T11SHAS12.A  
ai. T11SHAS12.B > T11SHAS12.A  
aj. T11SHAS12.B = T11SHAS12.A  
ak. T12SHAS12.B < T12SHAS12.A  
al. T12SHAS12.B > T12SHAS12.A  
am. T12SHAS12.B = T12SHAS12.A  
an. T0SHAS12.C < T0SHAS12.B  
ao. T0SHAS12.C > T0SHAS12.B  
ap. T0SHAS12.C = T0SHAS12.B  
aq. T1SHAS12.C < T1SHAS12.B  
ar. T1SHAS12.C > T1SHAS12.B  
as. T1SHAS12.C = T1SHAS12.B  
at. T2SHAS12.C < T2SHAS12.B  
au. T2SHAS12.C > T2SHAS12.B  
av. T2SHAS12.C = T2SHAS12.B  
aw. T3SHAS12.C < T3SHAS12.B  
ax. T3SHAS12.C > T3SHAS12.B  
ay. T3SHAS12.C = T3SHAS12.B  
az. T4SHAS12.C < T4SHAS12.B  
ba. T4SHAS12.C > T4SHAS12.B  
bb. T4SHAS12.C = T4SHAS12.B  
bc. T5SHAS12.C < T5SHAS12.B  
bd. T5SHAS12.C > T5SHAS12.B  
be. T5SHAS12.C = T5SHAS12.B  
bf. T6SHAS12.C < T6SHAS12.B  
bg. T6SHAS12.C > T6SHAS12.B  
bh. T6SHAS12.C = T6SHAS12.B

bh.  $T6SHAS12.C = T6SHAS12.B$   
bi.  $T7SHAS12.C < T7SHAS12.B$   
bj.  $T7SHAS12.C > T7SHAS12.B$   
bk.  $T7SHAS12.C = T7SHAS12.B$   
bl.  $T8SHAS12.C < T8SHAS12.B$   
bm.  $T8SHAS12.C > T8SHAS12.B$   
bn.  $T8SHAS12.C = T8SHAS12.B$   
bo.  $T9SHAS12.C < T9SHAS12.B$   
bp.  $T9SHAS12.C > T9SHAS12.B$   
bq.  $T9SHAS12.C = T9SHAS12.B$   
br.  $T10SHAS12.C < T10SHAS12.B$   
bs.  $T10SHAS12.C > T10SHAS12.B$   
bt.  $T10SHAS12.C = T10SHAS12.B$   
bu.  $T11SHAS12.C < T11SHAS12.B$   
bv.  $T11SHAS12.C > T11SHAS12.B$   
bw.  $T11SHAS12.C = T11SHAS12.B$   
bx.  $T12SHAS12.C < T12SHAS12.B$   
by.  $T12SHAS12.C > T12SHAS12.B$   
bz.  $T12SHAS12.C = T12SHAS12.B$   
ca.  $T0SHAS12.A < T0SHAS12.C$   
cb.  $T0SHAS12.A > T0SHAS12.C$   
cc.  $T0SHAS12.A = T0SHAS12.C$   
cd.  $T1SHAS12.A < T1SHAS12.C$   
ce.  $T1SHAS12.A > T1SHAS12.C$   
cf.  $T1SHAS12.A = T1SHAS12.C$   
cg.  $T2SHAS12.A < T2SHAS12.C$   
ch.  $T2SHAS12.A > T2SHAS12.C$   
ci.  $T2SHAS12.A = T2SHAS12.C$   
cj.  $T3SHAS12.A < T3SHAS12.C$   
ck.  $T3SHAS12.A > T3SHAS12.C$   
cl.  $T3SHAS12.A = T3SHAS12.C$   
cm.  $T4SHAS12.A < T4SHAS12.C$   
cn.  $T4SHAS12.A > T4SHAS12.C$   
co.  $T4SHAS12.A = T4SHAS12.C$   
cp.  $T5SHAS12.A < T5SHAS12.C$   
cq.  $T5SHAS12.A > T5SHAS12.C$   
cr.  $T5SHAS12.A = T5SHAS12.C$   
cs.  $T6SHAS12.A < T6SHAS12.C$   
ct.  $T6SHAS12.A > T6SHAS12.C$   
cu.  $T6SHAS12.A = T6SHAS12.C$   
cv.  $T7SHAS12.A < T7SHAS12.C$   
cw.  $T7SHAS12.A > T7SHAS12.C$   
cx.  $T7SHAS12.A = T7SHAS12.C$   
cy.  $T8SHAS12.A < T8SHAS12.C$   
--  $T8SHAS12.A = T8SHAS12.C$

- cz. T8SHAS12.A > T8SHAS12.C
- da. T8SHAS12.A = T8SHAS12.C
- db. T9SHAS12.A < T9SHAS12.C
- dc. T9SHAS12.A > T9SHAS12.C
- dd. T9SHAS12.A = T9SHAS12.C
- de. T10SHAS12.A < T10SHAS12.C
- df. T10SHAS12.A > T10SHAS12.C
- dg. T10SHAS12.A = T10SHAS12.C
- dh. T11SHAS12.A < T11SHAS12.C
- di. T11SHAS12.A > T11SHAS12.C
- dj. T11SHAS12.A = T11SHAS12.C
- dk. T12SHAS12.A < T12SHAS12.C
- dl. T12SHAS12.A > T12SHAS12.C
- dm. T12SHAS12.A = T12SHAS12.C

**Test Statistics<sup>a</sup>**

|                        | T0SHAS12.B -<br>T0SHAS12.A | T1SHAS12.B -<br>T1SHAS12.A | T2SHAS12.B -<br>T2SHAS12.A | T3SHAS12.B -<br>T3SHAS12.A |
|------------------------|----------------------------|----------------------------|----------------------------|----------------------------|
| Z                      | .000 <sup>b</sup>          | -1.732 <sup>c</sup>        | -1.414 <sup>c</sup>        | -1.518 <sup>c</sup>        |
| Asymp. Sig. (2-tailed) | 1.000                      | .083                       | .157                       | .129                       |

**Test Statistics<sup>a</sup>**

|                        | T4SHAS12.B -<br>T4SHAS12.A | T5SHAS12.B -<br>T5SHAS12.A | T6SHAS12.B -<br>T6SHAS12.A | T7SHAS12.B -<br>T7SHAS12.A |
|------------------------|----------------------------|----------------------------|----------------------------|----------------------------|
| Z                      | -2.460 <sup>c</sup>        | -1.628 <sup>c</sup>        | -2.848 <sup>c</sup>        | -2.354 <sup>c</sup>        |
| Asymp. Sig. (2-tailed) | .014                       | .103                       | .004                       | .019                       |

**Test Statistics<sup>a</sup>**

|                        | T8SHAS12.B -<br>T8SHAS12.A | T9SHAS12.B -<br>T9SHAS12.A | T10SHAS12.B -<br>T10SHAS12.A | T11SHAS12.B -<br>T11SHAS12.A |
|------------------------|----------------------------|----------------------------|------------------------------|------------------------------|
| Z                      | -2.848 <sup>c</sup>        | -1.508 <sup>c</sup>        | -2.124 <sup>c</sup>          | -.707 <sup>c</sup>           |
| Asymp. Sig. (2-tailed) | .004                       | .132                       | .034                         | .480                         |

**Test Statistics<sup>a</sup>**

|                        | T12SHAS12.B -<br>T12SHAS12.A | T0SHAS12.C -<br>T0SHAS12.B | T1SHAS12.C -<br>T1SHAS12.B | T2SHAS12.C -<br>T2SHAS12.B |
|------------------------|------------------------------|----------------------------|----------------------------|----------------------------|
| Z                      | -.966 <sup>c</sup>           | -1.732 <sup>c</sup>        | -.577 <sup>c</sup>         | -.577 <sup>c</sup>         |
| Asymp. Sig. (2-tailed) | .334                         | .083                       | .564                       | .564                       |

**Test Statistics<sup>a</sup>**

|                        | T3SHAS12.C - T3SHAS12.B | T4SHAS12.C - T4SHAS12.B | T5SHAS12.C - T5SHAS12.B | T6SHAS12.C - T6SHAS12.B |
|------------------------|-------------------------|-------------------------|-------------------------|-------------------------|
| Z                      | .000 <sup>b</sup>       | -1.998 <sup>d</sup>     | -2.412 <sup>d</sup>     | -2.751 <sup>d</sup>     |
| Asymp. Sig. (2-tailed) | 1.000                   | .046                    | .016                    | .006                    |

**Test Statistics<sup>a</sup>**

|                        | T7SHAS12.C - T7SHAS12.B | T8SHAS12.C - T8SHAS12.B | T9SHAS12.C - T9SHAS12.B | T10SHAS12.C - T10SHAS12.B |
|------------------------|-------------------------|-------------------------|-------------------------|---------------------------|
| Z                      | -2.807 <sup>d</sup>     | -2.047 <sup>d</sup>     | -2.251 <sup>d</sup>     | -1.667 <sup>d</sup>       |
| Asymp. Sig. (2-tailed) | .005                    | .041                    | .024                    | .096                      |

**Test Statistics<sup>a</sup>**

|                        | T11SHAS12.C - T11SHAS12.B | T12SHAS12.C - T12SHAS12.B | T0SHAS12.A - T0SHAS12.C | T1SHAS12.A - T1SHAS12.C |
|------------------------|---------------------------|---------------------------|-------------------------|-------------------------|
| Z                      | -.816 <sup>d</sup>        | -.447 <sup>d</sup>        | -1.732 <sup>d</sup>     | -1.732 <sup>d</sup>     |
| Asymp. Sig. (2-tailed) | .414                      | .655                      | .083                    | .083                    |

**Test Statistics<sup>a</sup>**

|                        | T2SHAS12.A - T2SHAS12.C | T3SHAS12.A - T3SHAS12.C | T4SHAS12.A - T4SHAS12.C | T5SHAS12.A - T5SHAS12.C |
|------------------------|-------------------------|-------------------------|-------------------------|-------------------------|
| Z                      | -1.732 <sup>d</sup>     | -1.667 <sup>d</sup>     | -.302 <sup>d</sup>      | -1.473 <sup>c</sup>     |
| Asymp. Sig. (2-tailed) | .083                    | .096                    | .763                    | .141                    |

**Test Statistics<sup>a</sup>**

|                        | T6SHAS12.A - T6SHAS12.C | T7SHAS12.A - T7SHAS12.C | T8SHAS12.A - T8SHAS12.C | T9SHAS12.A - T9SHAS12.C |
|------------------------|-------------------------|-------------------------|-------------------------|-------------------------|
| Z                      | -.122 <sup>c</sup>      | -.604 <sup>c</sup>      | -.288 <sup>d</sup>      | -2.121 <sup>c</sup>     |
| Asymp. Sig. (2-tailed) | .903                    | .546                    | .774                    | .034                    |

**Test Statistics<sup>a</sup>**

|                        | T10SHAS12.A - T10SHAS12.C | T11SHAS12.A - T11SHAS12.C | T12SHAS12.A - T12SHAS12.C |
|------------------------|---------------------------|---------------------------|---------------------------|
| Z                      | -.378 <sup>d</sup>        | -.816 <sup>c</sup>        | -.378 <sup>d</sup>        |
| Asymp. Sig. (2-tailed) | .705                      | .414                      | .705                      |

a. Wilcoxon Signed Ranks Test

b. The sum of negative ranks equals the sum of positive ranks.

c. Based on positive ranks.

d. Based on negative ranks.

## NPar Tests

### Notes

|                               |                                       |                                                                                                               |
|-------------------------------|---------------------------------------|---------------------------------------------------------------------------------------------------------------|
| <b>Output Created</b>         |                                       | <b>05-MAR-2025 21:25:36</b>                                                                                   |
| <b>Comments</b>               |                                       |                                                                                                               |
| <b>Input</b>                  | <b>Data</b>                           | <b>/Users/dicec004/My Drive/WANA stuff/WANA Merged Data.sav</b>                                               |
|                               | <b>Active Dataset</b>                 | <b>DataSet1</b>                                                                                               |
|                               | <b>Filter</b>                         | <b>&lt;none&gt;</b>                                                                                           |
|                               | <b>Weight</b>                         | <b>&lt;none&gt;</b>                                                                                           |
|                               | <b>Split File</b>                     | <b>&lt;none&gt;</b>                                                                                           |
|                               | <b>N of Rows in Working Data File</b> | <b>20</b>                                                                                                     |
| <b>Missing Value Handling</b> | <b>Definition of Missing</b>          | <b>User-defined missing values are treated as missing.</b>                                                    |
|                               | <b>Cases Used</b>                     | <b>Statistics for each test are based on all cases with valid data for the variable(s) used in that test.</b> |

## Notes

Syntax

NPAR TESTS

```
/WILCOXON=T0SHAS13.  
A T1SHAS13.A  
T2SHAS13.A T3SHAS13.  
A T4SHAS13.A  
T5SHAS13.A T6SHAS13.  
A T7SHAS13.A  
T8SHAS13.A T9SHAS13.  
A T10SHAS13.A  
T11SHAS13.A  
T12SHAS13.A  
T0SHAS13.B  
T1SHAS13.B T2SHAS13.B  
T3SHAS13.B T4SHAS13.B  
T5SHAS13.B T6SHAS13.B  
T7SHAS13.B T8SHAS13.B  
T9SHAS13.B T10SHAS13.  
B  
T11SHAS13.B  
T12SHAS13.B  
T0SHAS13.C  
T1SHAS13.C T2SHAS13.  
C T3SHAS13.C  
T4SHAS13.C T5SHAS13.  
C T6SHAS13.C  
T7SHAS13.C T8SHAS13.  
C T9SHAS13.C  
T10SHAS13.C  
T11SHAS13.C  
T12SHAS13.C  
WITH  
T0SHAS13.B  
T1SHAS13.B T2SHAS13.B  
T3SHAS13.B T4SHAS13.B  
T5SHAS13.B T6SHAS13.B  
T7SHAS13.B T8SHAS13.B  
T9SHAS13.B T10SHAS13.  
B  
T11SHAS13.B  
T12SHAS13.B  
T0SHAS13.C  
T1SHAS13.C T2SHAS13.  
C T3SHAS13.C  
T4SHAS13.C T5SHAS13.  
C T6SHAS13.C  
T7SHAS13.C T8SHAS13.  
C T9SHAS13.C  
T10SHAS13.C  
T11SHAS13.C  
T12SHAS13.C  
T0SHAS13.A  
T1SHAS13.A T2SHAS13.  
A T3SHAS13.A  
T4SHAS13.A T5SHAS13.  
A T6SHAS13.A  
T7SHAS13.A T8SHAS13.  
A T9SHAS13.A  
T10SHAS13.A  
T11SHAS13.A  
T12SHAS13.A (PAIRED)  
/STATISTICS  
DESCRIPTIVES  
/MISSING ANALYSIS.
```

### Notes

|           |                                      |             |
|-----------|--------------------------------------|-------------|
| Resources | Processor Time                       | 00:00:00.06 |
|           | Elapsed Time                         | 00:00:00.00 |
|           | Number of Cases Allowed <sup>a</sup> | 71493       |

a. Based on availability of workspace memory.

### Descriptive Statistics

|             | N  | Mean | Std. Deviation | Minimum | Maximum |
|-------------|----|------|----------------|---------|---------|
| T0SHAS13.A  | 19 | 1.00 | .000           | 1       | 1       |
| T1SHAS13.A  | 16 | 1.31 | .479           | 1       | 2       |
| T2SHAS13.A  | 17 | 1.35 | .606           | 1       | 3       |
| T3SHAS13.A  | 19 | 1.32 | .582           | 1       | 3       |
| T4SHAS13.A  | 19 | 1.53 | .841           | 1       | 3       |
| T5SHAS13.A  | 19 | 1.84 | 1.385          | 1       | 6       |
| T6SHAS13.A  | 19 | 1.89 | 1.524          | 1       | 7       |
| T7SHAS13.A  | 18 | 1.89 | 1.641          | 1       | 7       |
| T8SHAS13.A  | 19 | 1.63 | 1.165          | 1       | 5       |
| T9SHAS13.A  | 19 | 1.58 | 1.071          | 1       | 5       |
| T10SHAS13.A | 19 | 1.37 | .684           | 1       | 3       |
| T11SHAS13.A | 19 | 1.21 | .419           | 1       | 2       |
| T12SHAS13.A | 18 | 1.22 | .428           | 1       | 2       |
| T0SHAS13.B  | 18 | 1.00 | .000           | 1       | 1       |
| T1SHAS13.B  | 18 | 1.06 | .236           | 1       | 2       |
| T2SHAS13.B  | 19 | 1.00 | .000           | 1       | 1       |
| T3SHAS13.B  | 19 | 1.05 | .229           | 1       | 2       |
| T4SHAS13.B  | 19 | 1.11 | .315           | 1       | 2       |
| T5SHAS13.B  | 19 | 1.11 | .315           | 1       | 2       |
| T6SHAS13.B  | 19 | 1.05 | .229           | 1       | 2       |
| T7SHAS13.B  | 19 | 1.05 | .229           | 1       | 2       |
| T8SHAS13.B  | 18 | 1.11 | .323           | 1       | 2       |
| T9SHAS13.B  | 19 | 1.11 | .315           | 1       | 2       |
| T10SHAS13.B | 19 | 1.21 | .535           | 1       | 3       |
| T11SHAS13.B | 18 | 1.17 | .383           | 1       | 2       |
| T12SHAS13.B | 17 | 1.12 | .332           | 1       | 2       |
| T0SHAS13.C  | 18 | 1.00 | .000           | 1       | 1       |
| T1SHAS13.C  | 18 | 1.17 | .383           | 1       | 2       |
| T2SHAS13.C  | 17 | 1.06 | .243           | 1       | 2       |
| T3SHAS13.C  | 18 | 1.28 | .461           | 1       | 2       |
| T4SHAS13.C  | 18 | 1.33 | .594           | 1       | 3       |
| T5SHAS13.C  | 18 | 1.78 | 1.003          | 1       | 4       |
| T6SHAS13.C  | 18 | 1.72 | .895           | 1       | 4       |

### Descriptive Statistics

|             | N  | Mean | Std. Deviation | Minimum | Maximum |
|-------------|----|------|----------------|---------|---------|
| T7SHAS13.C  | 18 | 1.78 | 1.166          | 1       | 5       |
| T8SHAS13.C  | 18 | 1.44 | 1.042          | 1       | 5       |
| T9SHAS13.C  | 17 | 1.35 | .786           | 1       | 4       |
| T10SHAS13.C | 18 | 1.28 | .752           | 1       | 4       |
| T11SHAS13.C | 17 | 1.29 | .588           | 1       | 3       |
| T12SHAS13.C | 17 | 1.29 | .588           | 1       | 3       |

### Wilcoxon Signed Ranks Test

#### Ranks

|                         |                | N               | Mean Rank | Sum of Ranks |
|-------------------------|----------------|-----------------|-----------|--------------|
| T0SHAS13.B - T0SHAS13.A | Negative Ranks | 0 <sup>a</sup>  | .00       | .00          |
|                         | Positive Ranks | 0 <sup>b</sup>  | .00       | .00          |
|                         | Ties           | 18 <sup>c</sup> |           |              |
|                         | Total          | 18              |           |              |
| T1SHAS13.B - T1SHAS13.A | Negative Ranks | 5 <sup>d</sup>  | 3.50      | 17.50        |
|                         | Positive Ranks | 1 <sup>e</sup>  | 3.50      | 3.50         |
|                         | Ties           | 9 <sup>f</sup>  |           |              |
|                         | Total          | 15              |           |              |
| T2SHAS13.B - T2SHAS13.A | Negative Ranks | 5 <sup>g</sup>  | 3.00      | 15.00        |
|                         | Positive Ranks | 0 <sup>h</sup>  | .00       | .00          |
|                         | Ties           | 12 <sup>i</sup> |           |              |
|                         | Total          | 17              |           |              |
| T3SHAS13.B - T3SHAS13.A | Negative Ranks | 4 <sup>j</sup>  | 2.50      | 10.00        |
|                         | Positive Ranks | 0 <sup>k</sup>  | .00       | .00          |
|                         | Ties           | 15 <sup>l</sup> |           |              |
|                         | Total          | 19              |           |              |
| T4SHAS13.B - T4SHAS13.A | Negative Ranks | 5 <sup>m</sup>  | 3.90      | 19.50        |
|                         | Positive Ranks | 1 <sup>n</sup>  | 1.50      | 1.50         |
|                         | Ties           | 13 <sup>o</sup> |           |              |
|                         | Total          | 19              |           |              |
| T5SHAS13.B - T5SHAS13.A | Negative Ranks | 6 <sup>p</sup>  | 4.42      | 26.50        |
|                         | Positive Ranks | 1 <sup>q</sup>  | 1.50      | 1.50         |
|                         | Ties           | 12 <sup>r</sup> |           |              |
|                         | Total          | 19              |           |              |
| T6SHAS13.B - T6SHAS13.A | Negative Ranks | 7 <sup>s</sup>  | 4.00      | 28.00        |
|                         | Positive Ranks | 0 <sup>t</sup>  | .00       | .00          |
|                         | Ties           | 12 <sup>u</sup> |           |              |
|                         | Total          | 19              |           |              |

### Ranks

|                           |                | N                | Mean Rank | Sum of Ranks |
|---------------------------|----------------|------------------|-----------|--------------|
| T7SHAS13.B - T7SHAS13.A   | Negative Ranks | 7 <sup>v</sup>   | 4.00      | 28.00        |
|                           | Positive Ranks | 0 <sup>w</sup>   | .00       | .00          |
|                           | Ties           | 11 <sup>x</sup>  |           |              |
|                           | Total          | 18               |           |              |
| T8SHAS13.B - T8SHAS13.A   | Negative Ranks | 6 <sup>y</sup>   | 3.50      | 21.00        |
|                           | Positive Ranks | 0 <sup>z</sup>   | .00       | .00          |
|                           | Ties           | 12 <sup>aa</sup> |           |              |
|                           | Total          | 18               |           |              |
| T9SHAS13.B - T9SHAS13.A   | Negative Ranks | 5 <sup>ab</sup>  | 3.00      | 15.00        |
|                           | Positive Ranks | 0 <sup>ac</sup>  | .00       | .00          |
|                           | Ties           | 14 <sup>ad</sup> |           |              |
|                           | Total          | 19               |           |              |
| T10SHAS13.B - T10SHAS13.A | Negative Ranks | 4 <sup>ae</sup>  | 2.63      | 10.50        |
|                           | Positive Ranks | 1 <sup>af</sup>  | 4.50      | 4.50         |
|                           | Ties           | 14 <sup>ag</sup> |           |              |
|                           | Total          | 19               |           |              |
| T11SHAS13.B - T11SHAS13.A | Negative Ranks | 2 <sup>ah</sup>  | 2.00      | 4.00         |
|                           | Positive Ranks | 1 <sup>ai</sup>  | 2.00      | 2.00         |
|                           | Ties           | 15 <sup>aj</sup> |           |              |
|                           | Total          | 18               |           |              |
| T12SHAS13.B - T12SHAS13.A | Negative Ranks | 2 <sup>ak</sup>  | 2.00      | 4.00         |
|                           | Positive Ranks | 1 <sup>al</sup>  | 2.00      | 2.00         |
|                           | Ties           | 13 <sup>am</sup> |           |              |
|                           | Total          | 16               |           |              |
| T0SHAS13.C - T0SHAS13.B   | Negative Ranks | 0 <sup>an</sup>  | .00       | .00          |
|                           | Positive Ranks | 0 <sup>ao</sup>  | .00       | .00          |
|                           | Ties           | 17 <sup>ap</sup> |           |              |
|                           | Total          | 17               |           |              |
| T1SHAS13.C - T1SHAS13.B   | Negative Ranks | 1 <sup>aq</sup>  | 2.50      | 2.50         |
|                           | Positive Ranks | 3 <sup>ar</sup>  | 2.50      | 7.50         |
|                           | Ties           | 13 <sup>as</sup> |           |              |
|                           | Total          | 17               |           |              |
| T2SHAS13.C - T2SHAS13.B   | Negative Ranks | 0 <sup>at</sup>  | .00       | .00          |
|                           | Positive Ranks | 1 <sup>au</sup>  | 1.00      | 1.00         |
|                           | Ties           | 16 <sup>av</sup> |           |              |
|                           | Total          | 17               |           |              |
| T3SHAS13.C - T3SHAS13.B   | Negative Ranks | 1 <sup>aw</sup>  | 3.50      | 3.50         |
|                           | Positive Ranks | 5 <sup>ax</sup>  | 3.50      | 17.50        |

### Ranks

|                           |                | N                | Mean Rank | Sum of Ranks |
|---------------------------|----------------|------------------|-----------|--------------|
|                           | Ties           | 12 <sup>ay</sup> |           |              |
|                           | Total          | 18               |           |              |
| T4SHAS13.C - T4SHAS13.B   | Negative Ranks | 0 <sup>az</sup>  | .00       | .00          |
|                           | Positive Ranks | 3 <sup>ba</sup>  | 2.00      | 6.00         |
|                           | Ties           | 15 <sup>bb</sup> |           |              |
|                           | Total          | 18               |           |              |
| T5SHAS13.C - T5SHAS13.B   | Negative Ranks | 0 <sup>bc</sup>  | .00       | .00          |
|                           | Positive Ranks | 7 <sup>bd</sup>  | 4.00      | 28.00        |
|                           | Ties           | 11 <sup>be</sup> |           |              |
|                           | Total          | 18               |           |              |
| T6SHAS13.C - T6SHAS13.B   | Negative Ranks | 0 <sup>bf</sup>  | .00       | .00          |
|                           | Positive Ranks | 8 <sup>bg</sup>  | 4.50      | 36.00        |
|                           | Ties           | 10 <sup>bh</sup> |           |              |
|                           | Total          | 18               |           |              |
| T7SHAS13.C - T7SHAS13.B   | Negative Ranks | 0 <sup>bi</sup>  | .00       | .00          |
|                           | Positive Ranks | 7 <sup>bj</sup>  | 4.00      | 28.00        |
|                           | Ties           | 11 <sup>bk</sup> |           |              |
|                           | Total          | 18               |           |              |
| T8SHAS13.C - T8SHAS13.B   | Negative Ranks | 1 <sup>bl</sup>  | 2.00      | 2.00         |
|                           | Positive Ranks | 4 <sup>bm</sup>  | 3.25      | 13.00        |
|                           | Ties           | 12 <sup>bn</sup> |           |              |
|                           | Total          | 17               |           |              |
| T9SHAS13.C - T9SHAS13.B   | Negative Ranks | 0 <sup>bo</sup>  | .00       | .00          |
|                           | Positive Ranks | 3 <sup>bp</sup>  | 2.00      | 6.00         |
|                           | Ties           | 14 <sup>bq</sup> |           |              |
|                           | Total          | 17               |           |              |
| T10SHAS13.C - T10SHAS13.B | Negative Ranks | 1 <sup>br</sup>  | 2.50      | 2.50         |
|                           | Positive Ranks | 2 <sup>bs</sup>  | 1.75      | 3.50         |
|                           | Ties           | 15 <sup>bt</sup> |           |              |
|                           | Total          | 18               |           |              |
| T11SHAS13.C - T11SHAS13.B | Negative Ranks | 1 <sup>bu</sup>  | 2.50      | 2.50         |
|                           | Positive Ranks | 3 <sup>bv</sup>  | 2.50      | 7.50         |
|                           | Ties           | 12 <sup>bw</sup> |           |              |
|                           | Total          | 16               |           |              |
| T12SHAS13.C - T12SHAS13.B | Negative Ranks | 1 <sup>bx</sup>  | 2.00      | 2.00         |
|                           | Positive Ranks | 2 <sup>by</sup>  | 2.00      | 4.00         |
|                           | Ties           | 12 <sup>bz</sup> |           |              |
|                           | Total          | 15               |           |              |

### Ranks

|                             |                | N                | Mean Rank | Sum of Ranks |
|-----------------------------|----------------|------------------|-----------|--------------|
| T0SHAS13.A - T0SHAS13.<br>C | Negative Ranks | 0 <sup>ca</sup>  | .00       | .00          |
|                             | Positive Ranks | 0 <sup>cb</sup>  | .00       | .00          |
|                             | Ties           | 18 <sup>cc</sup> |           |              |
|                             | Total          | 18               |           |              |
| T1SHAS13.A - T1SHAS13.<br>C | Negative Ranks | 0 <sup>cd</sup>  | .00       | .00          |
|                             | Positive Ranks | 2 <sup>ce</sup>  | 1.50      | 3.00         |
|                             | Ties           | 14 <sup>cf</sup> |           |              |
|                             | Total          | 16               |           |              |
| T2SHAS13.A - T2SHAS13.<br>C | Negative Ranks | 0 <sup>cg</sup>  | .00       | .00          |
|                             | Positive Ranks | 4 <sup>ch</sup>  | 2.50      | 10.00        |
|                             | Ties           | 12 <sup>ci</sup> |           |              |
|                             | Total          | 16               |           |              |
| T3SHAS13.A - T3SHAS13.<br>C | Negative Ranks | 3 <sup>cj</sup>  | 3.00      | 9.00         |
|                             | Positive Ranks | 3 <sup>ck</sup>  | 4.00      | 12.00        |
|                             | Ties           | 12 <sup>cl</sup> |           |              |
|                             | Total          | 18               |           |              |
| T4SHAS13.A - T4SHAS13.<br>C | Negative Ranks | 2 <sup>cm</sup>  | 2.00      | 4.00         |
|                             | Positive Ranks | 3 <sup>cn</sup>  | 3.67      | 11.00        |
|                             | Ties           | 13 <sup>co</sup> |           |              |
|                             | Total          | 18               |           |              |
| T5SHAS13.A - T5SHAS13.<br>C | Negative Ranks | 5 <sup>cp</sup>  | 3.40      | 17.00        |
|                             | Positive Ranks | 2 <sup>cq</sup>  | 5.50      | 11.00        |
|                             | Ties           | 11 <sup>cr</sup> |           |              |
|                             | Total          | 18               |           |              |
| T6SHAS13.A - T6SHAS13.<br>C | Negative Ranks | 4 <sup>cs</sup>  | 4.00      | 16.00        |
|                             | Positive Ranks | 3 <sup>ct</sup>  | 4.00      | 12.00        |
|                             | Ties           | 11 <sup>cu</sup> |           |              |
|                             | Total          | 18               |           |              |
| T7SHAS13.A - T7SHAS13.<br>C | Negative Ranks | 4 <sup>cv</sup>  | 3.25      | 13.00        |
|                             | Positive Ranks | 2 <sup>cw</sup>  | 4.00      | 8.00         |
|                             | Ties           | 11 <sup>cx</sup> |           |              |
|                             | Total          | 17               |           |              |
| T8SHAS13.A - T8SHAS13.<br>C | Negative Ranks | 4 <sup>cy</sup>  | 3.75      | 15.00        |
|                             | Positive Ranks | 3 <sup>cz</sup>  | 4.33      | 13.00        |
|                             | Ties           | 11 <sup>da</sup> |           |              |
|                             | Total          | 18               |           |              |
| T9SHAS13.A - T9SHAS13.<br>C | Negative Ranks | 2 <sup>db</sup>  | 2.00      | 4.00         |
|                             | Positive Ranks | 2 <sup>dc</sup>  | 3.00      | 6.00         |

### Ranks

|                              |                | N                | Mean Rank | Sum of Ranks |
|------------------------------|----------------|------------------|-----------|--------------|
|                              | Ties           | 13 <sup>dd</sup> |           |              |
|                              | Total          | 17               |           |              |
| T10SHAS13.A -<br>T10SHAS13.C | Negative Ranks | 1 <sup>de</sup>  | 3.00      | 3.00         |
|                              | Positive Ranks | 2 <sup>df</sup>  | 1.50      | 3.00         |
|                              | Ties           | 15 <sup>dg</sup> |           |              |
|                              | Total          | 18               |           |              |
| T11SHAS13.A -<br>T11SHAS13.C | Negative Ranks | 2 <sup>dh</sup>  | 1.50      | 3.00         |
|                              | Positive Ranks | 0 <sup>di</sup>  | .00       | .00          |
|                              | Ties           | 15 <sup>dj</sup> |           |              |
|                              | Total          | 17               |           |              |
| T12SHAS13.A -<br>T12SHAS13.C | Negative Ranks | 2 <sup>dk</sup>  | 1.50      | 3.00         |
|                              | Positive Ranks | 0 <sup>dl</sup>  | .00       | .00          |
|                              | Ties           | 14 <sup>dm</sup> |           |              |
|                              | Total          | 16               |           |              |

- a. T0SHAS13.B < T0SHAS13.A
- b. T0SHAS13.B > T0SHAS13.A
- c. T0SHAS13.B = T0SHAS13.A
- d. T1SHAS13.B < T1SHAS13.A
- e. T1SHAS13.B > T1SHAS13.A
- f. T1SHAS13.B = T1SHAS13.A
- g. T2SHAS13.B < T2SHAS13.A
- h. T2SHAS13.B > T2SHAS13.A
- i. T2SHAS13.B = T2SHAS13.A
- j. T3SHAS13.B < T3SHAS13.A
- k. T3SHAS13.B > T3SHAS13.A
- l. T3SHAS13.B = T3SHAS13.A
- m. T4SHAS13.B < T4SHAS13.A
- n. T4SHAS13.B > T4SHAS13.A
- o. T4SHAS13.B = T4SHAS13.A
- p. T5SHAS13.B < T5SHAS13.A

p. T5SHAS13.B < T5SHAS13.A  
q. T5SHAS13.B > T5SHAS13.A  
r. T5SHAS13.B = T5SHAS13.A  
s. T6SHAS13.B < T6SHAS13.A  
t. T6SHAS13.B > T6SHAS13.A  
u. T6SHAS13.B = T6SHAS13.A  
v. T7SHAS13.B < T7SHAS13.A  
w. T7SHAS13.B > T7SHAS13.A  
x. T7SHAS13.B = T7SHAS13.A  
y. T8SHAS13.B < T8SHAS13.A  
z. T8SHAS13.B > T8SHAS13.A  
aa. T8SHAS13.B = T8SHAS13.A  
ab. T9SHAS13.B < T9SHAS13.A  
ac. T9SHAS13.B > T9SHAS13.A  
ad. T9SHAS13.B = T9SHAS13.A  
ae. T10SHAS13.B < T10SHAS13.A  
af. T10SHAS13.B > T10SHAS13.A  
ag. T10SHAS13.B = T10SHAS13.A  
ah. T11SHAS13.B < T11SHAS13.A  
ai. T11SHAS13.B > T11SHAS13.A  
aj. T11SHAS13.B = T11SHAS13.A  
ak. T12SHAS13.B < T12SHAS13.A  
al. T12SHAS13.B > T12SHAS13.A  
am. T12SHAS13.B = T12SHAS13.A  
an. T0SHAS13.C < T0SHAS13.B  
ao. T0SHAS13.C > T0SHAS13.B  
ap. T0SHAS13.C = T0SHAS13.B  
aq. T1SHAS13.C < T1SHAS13.B  
ar. T1SHAS13.C > T1SHAS13.B  
as. T1SHAS13.C = T1SHAS13.B  
at. T2SHAS13.C < T2SHAS13.B  
au. T2SHAS13.C > T2SHAS13.B  
av. T2SHAS13.C = T2SHAS13.B  
aw. T3SHAS13.C < T3SHAS13.B  
ax. T3SHAS13.C > T3SHAS13.B  
ay. T3SHAS13.C = T3SHAS13.B  
az. T4SHAS13.C < T4SHAS13.B  
ba. T4SHAS13.C > T4SHAS13.B  
bb. T4SHAS13.C = T4SHAS13.B  
bc. T5SHAS13.C < T5SHAS13.B  
bd. T5SHAS13.C > T5SHAS13.B  
be. T5SHAS13.C = T5SHAS13.B  
bf. T6SHAS13.C < T6SHAS13.B  
bg. T6SHAS13.C > T6SHAS13.B  
bh. T6SHAS13.C = T6SHAS13.B

bh. T6SHAS13.C = T6SHAS13.B  
bi. T7SHAS13.C < T7SHAS13.B  
bj. T7SHAS13.C > T7SHAS13.B  
bk. T7SHAS13.C = T7SHAS13.B  
bl. T8SHAS13.C < T8SHAS13.B  
bm. T8SHAS13.C > T8SHAS13.B  
bn. T8SHAS13.C = T8SHAS13.B  
bo. T9SHAS13.C < T9SHAS13.B  
bp. T9SHAS13.C > T9SHAS13.B  
bq. T9SHAS13.C = T9SHAS13.B  
br. T10SHAS13.C < T10SHAS13.B  
bs. T10SHAS13.C > T10SHAS13.B  
bt. T10SHAS13.C = T10SHAS13.B  
bu. T11SHAS13.C < T11SHAS13.B  
bv. T11SHAS13.C > T11SHAS13.B  
bw. T11SHAS13.C = T11SHAS13.B  
bx. T12SHAS13.C < T12SHAS13.B  
by. T12SHAS13.C > T12SHAS13.B  
bz. T12SHAS13.C = T12SHAS13.B  
ca. T0SHAS13.A < T0SHAS13.C  
cb. T0SHAS13.A > T0SHAS13.C  
cc. T0SHAS13.A = T0SHAS13.C  
cd. T1SHAS13.A < T1SHAS13.C  
ce. T1SHAS13.A > T1SHAS13.C  
cf. T1SHAS13.A = T1SHAS13.C  
cg. T2SHAS13.A < T2SHAS13.C  
ch. T2SHAS13.A > T2SHAS13.C  
ci. T2SHAS13.A = T2SHAS13.C  
cj. T3SHAS13.A < T3SHAS13.C  
ck. T3SHAS13.A > T3SHAS13.C  
cl. T3SHAS13.A = T3SHAS13.C  
cm. T4SHAS13.A < T4SHAS13.C  
cn. T4SHAS13.A > T4SHAS13.C  
co. T4SHAS13.A = T4SHAS13.C  
cp. T5SHAS13.A < T5SHAS13.C  
cq. T5SHAS13.A > T5SHAS13.C  
cr. T5SHAS13.A = T5SHAS13.C  
cs. T6SHAS13.A < T6SHAS13.C  
ct. T6SHAS13.A > T6SHAS13.C  
cu. T6SHAS13.A = T6SHAS13.C  
cv. T7SHAS13.A < T7SHAS13.C  
cw. T7SHAS13.A > T7SHAS13.C  
cx. T7SHAS13.A = T7SHAS13.C  
cy. T8SHAS13.A < T8SHAS13.C  
-- T8SHAS13.A > T8SHAS13.C

- cz. T8SHAS13.A > T8SHAS13.C
- da. T8SHAS13.A = T8SHAS13.C
- db. T9SHAS13.A < T9SHAS13.C
- dc. T9SHAS13.A > T9SHAS13.C
- dd. T9SHAS13.A = T9SHAS13.C
- de. T10SHAS13.A < T10SHAS13.C
- df. T10SHAS13.A > T10SHAS13.C
- dg. T10SHAS13.A = T10SHAS13.C
- dh. T11SHAS13.A < T11SHAS13.C
- di. T11SHAS13.A > T11SHAS13.C
- dj. T11SHAS13.A = T11SHAS13.C
- dk. T12SHAS13.A < T12SHAS13.C
- dl. T12SHAS13.A > T12SHAS13.C
- dm. T12SHAS13.A = T12SHAS13.C

**Test Statistics<sup>a</sup>**

|                        | T0SHAS13.B -<br>T0SHAS13.A | T1SHAS13.B -<br>T1SHAS13.A | T2SHAS13.B -<br>T2SHAS13.A | T3SHAS13.B -<br>T3SHAS13.A |
|------------------------|----------------------------|----------------------------|----------------------------|----------------------------|
| Z                      | .000 <sup>b</sup>          | -1.633 <sup>c</sup>        | -2.121 <sup>c</sup>        | -1.890 <sup>c</sup>        |
| Asymp. Sig. (2-tailed) | 1.000                      | .102                       | .034                       | .059                       |

**Test Statistics<sup>a</sup>**

|                        | T4SHAS13.B -<br>T4SHAS13.A | T5SHAS13.B -<br>T5SHAS13.A | T6SHAS13.B -<br>T6SHAS13.A | T7SHAS13.B -<br>T7SHAS13.A |
|------------------------|----------------------------|----------------------------|----------------------------|----------------------------|
| Z                      | -1.947 <sup>c</sup>        | -2.132 <sup>c</sup>        | -2.388 <sup>c</sup>        | -2.410 <sup>c</sup>        |
| Asymp. Sig. (2-tailed) | .052                       | .033                       | .017                       | .016                       |

**Test Statistics<sup>a</sup>**

|                        | T8SHAS13.B -<br>T8SHAS13.A | T9SHAS13.B -<br>T9SHAS13.A | T10SHAS13.B -<br>T10SHAS13.A | T11SHAS13.B -<br>T11SHAS13.A |
|------------------------|----------------------------|----------------------------|------------------------------|------------------------------|
| Z                      | -2.264 <sup>c</sup>        | -2.060 <sup>c</sup>        | -.828 <sup>c</sup>           | -.577 <sup>c</sup>           |
| Asymp. Sig. (2-tailed) | .024                       | .039                       | .408                         | .564                         |

**Test Statistics<sup>a</sup>**

|                        | T12SHAS13.B -<br>T12SHAS13.A | T0SHAS13.C -<br>T0SHAS13.B | T1SHAS13.C -<br>T1SHAS13.B | T2SHAS13.C -<br>T2SHAS13.B |
|------------------------|------------------------------|----------------------------|----------------------------|----------------------------|
| Z                      | -.577 <sup>c</sup>           | .000 <sup>b</sup>          | -1.000 <sup>d</sup>        | -1.000 <sup>d</sup>        |
| Asymp. Sig. (2-tailed) | .564                         | 1.000                      | .317                       | .317                       |

| Test Statistics <sup>a</sup> |                         |                         |                         |                         |
|------------------------------|-------------------------|-------------------------|-------------------------|-------------------------|
|                              | T3SHAS13.C - T3SHAS13.B | T4SHAS13.C - T4SHAS13.B | T5SHAS13.C - T5SHAS13.B | T6SHAS13.C - T6SHAS13.B |
| Z                            | -1.633 <sup>d</sup>     | -1.633 <sup>d</sup>     | -2.414 <sup>d</sup>     | -2.588 <sup>d</sup>     |
| Asymp. Sig. (2-tailed)       | .102                    | .102                    | .016                    | .010                    |

| Test Statistics <sup>a</sup> |                         |                         |                         |                           |
|------------------------------|-------------------------|-------------------------|-------------------------|---------------------------|
|                              | T7SHAS13.C - T7SHAS13.B | T8SHAS13.C - T8SHAS13.B | T9SHAS13.C - T9SHAS13.B | T10SHAS13.C - T10SHAS13.B |
| Z                            | -2.414 <sup>d</sup>     | -1.511 <sup>d</sup>     | -1.633 <sup>d</sup>     | -.272 <sup>d</sup>        |
| Asymp. Sig. (2-tailed)       | .016                    | .131                    | .102                    | .785                      |

| Test Statistics <sup>a</sup> |                           |                           |                         |                         |
|------------------------------|---------------------------|---------------------------|-------------------------|-------------------------|
|                              | T11SHAS13.C - T11SHAS13.B | T12SHAS13.C - T12SHAS13.B | T0SHAS13.A - T0SHAS13.C | T1SHAS13.A - T1SHAS13.C |
| Z                            | -1.000 <sup>d</sup>       | -.577 <sup>d</sup>        | .000 <sup>b</sup>       | -1.414 <sup>d</sup>     |
| Asymp. Sig. (2-tailed)       | .317                      | .564                      | 1.000                   | .157                    |

| Test Statistics <sup>a</sup> |                         |                         |                         |                         |
|------------------------------|-------------------------|-------------------------|-------------------------|-------------------------|
|                              | T2SHAS13.A - T2SHAS13.C | T3SHAS13.A - T3SHAS13.C | T4SHAS13.A - T4SHAS13.C | T5SHAS13.A - T5SHAS13.C |
| Z                            | -1.890 <sup>d</sup>     | -.333 <sup>d</sup>      | -.966 <sup>d</sup>      | -.517 <sup>c</sup>      |
| Asymp. Sig. (2-tailed)       | .059                    | .739                    | .334                    | .605                    |

| Test Statistics <sup>a</sup> |                         |                         |                         |                         |
|------------------------------|-------------------------|-------------------------|-------------------------|-------------------------|
|                              | T6SHAS13.A - T6SHAS13.C | T7SHAS13.A - T7SHAS13.C | T8SHAS13.A - T8SHAS13.C | T9SHAS13.A - T9SHAS13.C |
| Z                            | -.343 <sup>c</sup>      | -.541 <sup>c</sup>      | -.175 <sup>c</sup>      | -.378 <sup>d</sup>      |
| Asymp. Sig. (2-tailed)       | .732                    | .589                    | .861                    | .705                    |

| Test Statistics <sup>a</sup> |                           |                           |                           |
|------------------------------|---------------------------|---------------------------|---------------------------|
|                              | T10SHAS13.A - T10SHAS13.C | T11SHAS13.A - T11SHAS13.C | T12SHAS13.A - T12SHAS13.C |
| Z                            | .000 <sup>b</sup>         | -1.414 <sup>c</sup>       | -1.414 <sup>c</sup>       |
| Asymp. Sig. (2-tailed)       | 1.000                     | .157                      | .157                      |

a. Wilcoxon Signed Ranks Test

b. The sum of negative ranks equals the sum of positive ranks.

c. Based on positive ranks.

d. Based on negative ranks.

### Notes

|                               |                                            |                                                                                                                                                                                      |
|-------------------------------|--------------------------------------------|--------------------------------------------------------------------------------------------------------------------------------------------------------------------------------------|
| <b>Output Created</b>         |                                            | <b>05-MAR-2025 21:25:37</b>                                                                                                                                                          |
| <b>Comments</b>               |                                            |                                                                                                                                                                                      |
| <b>Input</b>                  | <b>Data</b>                                | <b>/Users/dicec004/My Drive/WANA stuff/WANA Merged Data.sav</b>                                                                                                                      |
|                               | <b>Active Dataset</b>                      | <b>DataSet1</b>                                                                                                                                                                      |
|                               | <b>Filter</b>                              | <b>&lt;none&gt;</b>                                                                                                                                                                  |
|                               | <b>Weight</b>                              | <b>&lt;none&gt;</b>                                                                                                                                                                  |
|                               | <b>Split File</b>                          | <b>&lt;none&gt;</b>                                                                                                                                                                  |
|                               | <b>N of Rows in Working Data File</b>      | <b>20</b>                                                                                                                                                                            |
| <b>Missing Value Handling</b> | <b>Definition of Missing</b>               | <b>User-defined missing values are treated as missing.</b>                                                                                                                           |
|                               | <b>Cases Used</b>                          | <b>Statistics for each test are based on all cases with valid data for the variable(s) used in that test.</b>                                                                        |
| <b>Syntax</b>                 |                                            | <b>NPART TESTS<br/>/WILCOXON=T5DRUID.<br/>A T4DRUID.B T4DRUID.C<br/>WITH<br/>T4DRUID.B T4DRUID.<br/>C T5DRUID.A (PAIRED)<br/>/STATISTICS<br/>DESCRIPTIVES<br/>/MISSING ANALYSIS.</b> |
| <b>Resources</b>              | <b>Processor Time</b>                      | <b>00:00:00.01</b>                                                                                                                                                                   |
|                               | <b>Elapsed Time</b>                        | <b>00:00:00.00</b>                                                                                                                                                                   |
|                               | <b>Number of Cases Allowed<sup>a</sup></b> | <b>393216</b>                                                                                                                                                                        |

a. Based on availability of workspace memory.

### Descriptive Statistics

|                  | <b>N</b>  | <b>Mean</b>   | <b>Std. Deviation</b> | <b>Minimum</b> | <b>Maximum</b> |
|------------------|-----------|---------------|-----------------------|----------------|----------------|
| <b>T5DRUID.A</b> | <b>20</b> | <b>43.225</b> | <b>5.2318</b>         | <b>36.9</b>    | <b>54.8</b>    |
| <b>T4DRUID.B</b> | <b>20</b> | <b>42.085</b> | <b>3.9159</b>         | <b>36.2</b>    | <b>49.7</b>    |
| <b>T4DRUID.C</b> | <b>20</b> | <b>43.305</b> | <b>5.0970</b>         | <b>36.4</b>    | <b>57.6</b>    |

### Wilcoxon Signed Ranks Test

### Ranks

|                       |                | N               | Mean Rank | Sum of Ranks |
|-----------------------|----------------|-----------------|-----------|--------------|
| T4DRUID.B - T5DRUID.A | Negative Ranks | 11 <sup>a</sup> | 12.00     | 132.00       |
|                       | Positive Ranks | 9 <sup>b</sup>  | 8.67      | 78.00        |
|                       | Ties           | 0 <sup>c</sup>  |           |              |
|                       | Total          | 20              |           |              |
| T4DRUID.C - T4DRUID.B | Negative Ranks | 11 <sup>d</sup> | 7.73      | 85.00        |
|                       | Positive Ranks | 9 <sup>e</sup>  | 13.89     | 125.00       |
|                       | Ties           | 0 <sup>f</sup>  |           |              |
|                       | Total          | 20              |           |              |
| T5DRUID.A - T4DRUID.C | Negative Ranks | 10 <sup>g</sup> | 11.75     | 117.50       |
|                       | Positive Ranks | 10 <sup>h</sup> | 9.25      | 92.50        |
|                       | Ties           | 0 <sup>i</sup>  |           |              |
|                       | Total          | 20              |           |              |

- a. T4DRUID.B < T5DRUID.A
- b. T4DRUID.B > T5DRUID.A
- c. T4DRUID.B = T5DRUID.A
- d. T4DRUID.C < T4DRUID.B
- e. T4DRUID.C > T4DRUID.B
- f. T4DRUID.C = T4DRUID.B
- g. T5DRUID.A < T4DRUID.C
- h. T5DRUID.A > T4DRUID.C
- i. T5DRUID.A = T4DRUID.C

### Test Statistics<sup>a</sup>

|                        | T4DRUID.B -<br>T5DRUID.A | T4DRUID.C -<br>T4DRUID.B | T5DRUID.A -<br>T4DRUID.C |
|------------------------|--------------------------|--------------------------|--------------------------|
| Z                      | -1.008 <sup>b</sup>      | -.747 <sup>c</sup>       | -.467 <sup>b</sup>       |
| Asymp. Sig. (2-tailed) | .313                     | .455                     | .641                     |

- a. Wilcoxon Signed Ranks Test
- b. Based on positive ranks.
- c. Based on negative ranks.

### NPar Tests

### Notes

|                               |                                            |                                                                                                                                                            |
|-------------------------------|--------------------------------------------|------------------------------------------------------------------------------------------------------------------------------------------------------------|
| <b>Output Created</b>         |                                            | <b>05-MAR-2025 21:25:37</b>                                                                                                                                |
| <b>Comments</b>               |                                            |                                                                                                                                                            |
| <b>Input</b>                  | <b>Data</b>                                | <b>/Users/dicec004/My Drive/WANA stuff/WANA Merged Data.sav</b>                                                                                            |
|                               | <b>Active Dataset</b>                      | <b>DataSet1</b>                                                                                                                                            |
|                               | <b>Filter</b>                              | <b>&lt;none&gt;</b>                                                                                                                                        |
|                               | <b>Weight</b>                              | <b>&lt;none&gt;</b>                                                                                                                                        |
|                               | <b>Split File</b>                          | <b>&lt;none&gt;</b>                                                                                                                                        |
|                               | <b>N of Rows in Working Data File</b>      | <b>20</b>                                                                                                                                                  |
| <b>Missing Value Handling</b> | <b>Definition of Missing</b>               | <b>User-defined missing values are treated as missing.</b>                                                                                                 |
|                               | <b>Cases Used</b>                          | <b>Statistics for each test are based on all cases with valid data for the variable(s) used in that test.</b>                                              |
| <b>Syntax</b>                 |                                            | <b>NPART TESTS<br/>/WILCOXON=T5SHAS3.A T4SHAS3.B T4SHAS3.C WITH T4SHAS3.B T4SHAS3.C T5SHAS3.A (PAIRED)<br/>/STATISTICS DESCRIPTIVES /MISSING ANALYSIS.</b> |
| <b>Resources</b>              | <b>Processor Time</b>                      | <b>00:00:00.01</b>                                                                                                                                         |
|                               | <b>Elapsed Time</b>                        | <b>00:00:00.00</b>                                                                                                                                         |
|                               | <b>Number of Cases Allowed<sup>a</sup></b> | <b>393216</b>                                                                                                                                              |

a. Based on availability of workspace memory.

### Descriptive Statistics

|                  | <b>N</b>  | <b>Mean</b> | <b>Std. Deviation</b> | <b>Minimum</b> | <b>Maximum</b> |
|------------------|-----------|-------------|-----------------------|----------------|----------------|
| <b>T5SHAS3.A</b> | <b>19</b> | <b>1.74</b> | <b>1.368</b>          | <b>1</b>       | <b>6</b>       |
| <b>T4SHAS3.B</b> | <b>19</b> | <b>1.00</b> | <b>.000</b>           | <b>1</b>       | <b>1</b>       |
| <b>T4SHAS3.C</b> | <b>18</b> | <b>1.33</b> | <b>.594</b>           | <b>1</b>       | <b>3</b>       |

### Wilcoxon Signed Ranks Test

### Ranks

|                       |                | N               | Mean Rank | Sum of Ranks |
|-----------------------|----------------|-----------------|-----------|--------------|
| T4SHAS3.B - T5SHAS3.A | Negative Ranks | 6 <sup>a</sup>  | 3.50      | 21.00        |
|                       | Positive Ranks | 0 <sup>b</sup>  | .00       | .00          |
|                       | Ties           | 13 <sup>c</sup> |           |              |
|                       | Total          | 19              |           |              |
| T4SHAS3.C - T4SHAS3.B | Negative Ranks | 0 <sup>d</sup>  | .00       | .00          |
|                       | Positive Ranks | 5 <sup>e</sup>  | 3.00      | 15.00        |
|                       | Ties           | 13 <sup>f</sup> |           |              |
|                       | Total          | 18              |           |              |
| T5SHAS3.A - T4SHAS3.C | Negative Ranks | 2 <sup>g</sup>  | 3.00      | 6.00         |
|                       | Positive Ranks | 6 <sup>h</sup>  | 5.00      | 30.00        |
|                       | Ties           | 10 <sup>i</sup> |           |              |
|                       | Total          | 18              |           |              |

- a. T4SHAS3.B < T5SHAS3.A
- b. T4SHAS3.B > T5SHAS3.A
- c. T4SHAS3.B = T5SHAS3.A
- d. T4SHAS3.C < T4SHAS3.B
- e. T4SHAS3.C > T4SHAS3.B
- f. T4SHAS3.C = T4SHAS3.B
- g. T5SHAS3.A < T4SHAS3.C
- h. T5SHAS3.A > T4SHAS3.C
- i. T5SHAS3.A = T4SHAS3.C

### Test Statistics<sup>a</sup>

|                        | T4SHAS3.B -<br>T5SHAS3.A | T4SHAS3.C -<br>T4SHAS3.B | T5SHAS3.A -<br>T4SHAS3.C |
|------------------------|--------------------------|--------------------------|--------------------------|
| Z                      | -2.214 <sup>b</sup>      | -2.121 <sup>c</sup>      | -1.725 <sup>c</sup>      |
| Asymp. Sig. (2-tailed) | .027                     | .034                     | .084                     |

- a. Wilcoxon Signed Ranks Test
- b. Based on positive ranks.
- c. Based on negative ranks.

### NPar Tests

## Notes

|                               |                                            |                                                                                                                                                                                      |
|-------------------------------|--------------------------------------------|--------------------------------------------------------------------------------------------------------------------------------------------------------------------------------------|
| <b>Output Created</b>         |                                            | <b>05-MAR-2025 21:25:37</b>                                                                                                                                                          |
| <b>Comments</b>               |                                            |                                                                                                                                                                                      |
| <b>Input</b>                  | <b>Data</b>                                | <b>/Users/dicec004/My Drive/WANA stuff/WANA Merged Data.sav</b>                                                                                                                      |
|                               | <b>Active Dataset</b>                      | <b>DataSet1</b>                                                                                                                                                                      |
|                               | <b>Filter</b>                              | <b>&lt;none&gt;</b>                                                                                                                                                                  |
|                               | <b>Weight</b>                              | <b>&lt;none&gt;</b>                                                                                                                                                                  |
|                               | <b>Split File</b>                          | <b>&lt;none&gt;</b>                                                                                                                                                                  |
|                               | <b>N of Rows in Working Data File</b>      | <b>20</b>                                                                                                                                                                            |
| <b>Missing Value Handling</b> | <b>Definition of Missing</b>               | <b>User-defined missing values are treated as missing.</b>                                                                                                                           |
|                               | <b>Cases Used</b>                          | <b>Statistics for each test are based on all cases with valid data for the variable(s) used in that test.</b>                                                                        |
| <b>Syntax</b>                 |                                            | <b>NPART TESTS<br/>/WILCOXON=T5SHAS4.<br/>A T4SHAS4.B T4SHAS4.C<br/>WITH<br/>T4SHAS4.B T4SHAS4.<br/>C T5SHAS4.A (PAIRED)<br/>/STATISTICS<br/>DESCRIPTIVES<br/>/MISSING ANALYSIS.</b> |
| <b>Resources</b>              | <b>Processor Time</b>                      | <b>00:00:00.01</b>                                                                                                                                                                   |
|                               | <b>Elapsed Time</b>                        | <b>00:00:00.00</b>                                                                                                                                                                   |
|                               | <b>Number of Cases Allowed<sup>a</sup></b> | <b>393216</b>                                                                                                                                                                        |

a. Based on availability of workspace memory.

### Descriptive Statistics

|                  | <b>N</b>  | <b>Mean</b> | <b>Std. Deviation</b> | <b>Minimum</b> | <b>Maximum</b> |
|------------------|-----------|-------------|-----------------------|----------------|----------------|
| <b>T5SHAS4.A</b> | <b>19</b> | <b>1.37</b> | <b>.684</b>           | <b>1</b>       | <b>3</b>       |
| <b>T4SHAS4.B</b> | <b>19</b> | <b>1.00</b> | <b>.000</b>           | <b>1</b>       | <b>1</b>       |
| <b>T4SHAS4.C</b> | <b>18</b> | <b>1.17</b> | <b>.514</b>           | <b>1</b>       | <b>3</b>       |

### Wilcoxon Signed Ranks Test

### Ranks

|                       |                | N               | Mean Rank | Sum of Ranks |
|-----------------------|----------------|-----------------|-----------|--------------|
| T4SHAS4.B - T5SHAS4.A | Negative Ranks | 5 <sup>a</sup>  | 3.00      | 15.00        |
|                       | Positive Ranks | 0 <sup>b</sup>  | .00       | .00          |
|                       | Ties           | 14 <sup>c</sup> |           |              |
|                       | Total          | 19              |           |              |
| T4SHAS4.C - T4SHAS4.B | Negative Ranks | 0 <sup>d</sup>  | .00       | .00          |
|                       | Positive Ranks | 2 <sup>e</sup>  | 1.50      | 3.00         |
|                       | Ties           | 16 <sup>f</sup> |           |              |
|                       | Total          | 18              |           |              |
| T5SHAS4.A - T4SHAS4.C | Negative Ranks | 1 <sup>g</sup>  | 5.00      | 5.00         |
|                       | Positive Ranks | 4 <sup>h</sup>  | 2.50      | 10.00        |
|                       | Ties           | 13 <sup>i</sup> |           |              |
|                       | Total          | 18              |           |              |

- a. T4SHAS4.B < T5SHAS4.A
- b. T4SHAS4.B > T5SHAS4.A
- c. T4SHAS4.B = T5SHAS4.A
- d. T4SHAS4.C < T4SHAS4.B
- e. T4SHAS4.C > T4SHAS4.B
- f. T4SHAS4.C = T4SHAS4.B
- g. T5SHAS4.A < T4SHAS4.C
- h. T5SHAS4.A > T4SHAS4.C
- i. T5SHAS4.A = T4SHAS4.C

### Test Statistics<sup>a</sup>

|                        | T4SHAS4.B -<br>T5SHAS4.A | T4SHAS4.C -<br>T4SHAS4.B | T5SHAS4.A -<br>T4SHAS4.C |
|------------------------|--------------------------|--------------------------|--------------------------|
| Z                      | -2.070 <sup>b</sup>      | -1.342 <sup>c</sup>      | -.707 <sup>c</sup>       |
| Asymp. Sig. (2-tailed) | .038                     | .180                     | .480                     |

- a. Wilcoxon Signed Ranks Test
- b. Based on positive ranks.
- c. Based on negative ranks.

### NPar Tests

### Notes

|                               |                                            |                                                                                                                                                                |
|-------------------------------|--------------------------------------------|----------------------------------------------------------------------------------------------------------------------------------------------------------------|
| <b>Output Created</b>         |                                            | <b>05-MAR-2025 21:25:37</b>                                                                                                                                    |
| <b>Comments</b>               |                                            |                                                                                                                                                                |
| <b>Input</b>                  | <b>Data</b>                                | <b>/Users/dicec004/My Drive/WANA stuff/WANA Merged Data.sav</b>                                                                                                |
|                               | <b>Active Dataset</b>                      | <b>DataSet1</b>                                                                                                                                                |
|                               | <b>Filter</b>                              | <b>&lt;none&gt;</b>                                                                                                                                            |
|                               | <b>Weight</b>                              | <b>&lt;none&gt;</b>                                                                                                                                            |
|                               | <b>Split File</b>                          | <b>&lt;none&gt;</b>                                                                                                                                            |
|                               | <b>N of Rows in Working Data File</b>      | <b>20</b>                                                                                                                                                      |
| <b>Missing Value Handling</b> | <b>Definition of Missing</b>               | <b>User-defined missing values are treated as missing.</b>                                                                                                     |
|                               | <b>Cases Used</b>                          | <b>Statistics for each test are based on all cases with valid data for the variable(s) used in that test.</b>                                                  |
| <b>Syntax</b>                 |                                            | <b>NPART TESTS<br/>/WILCOXON=T5SHAS5.A T4SHAS5.B T4SHAS5.C WITH T4SHAS5.B T4SHAS5.C T5SHAS5.A (PAIRED)<br/>/STATISTICS DESCRIPTIVES<br/>/MISSING ANALYSIS.</b> |
| <b>Resources</b>              | <b>Processor Time</b>                      | <b>00:00:00.01</b>                                                                                                                                             |
|                               | <b>Elapsed Time</b>                        | <b>00:00:00.00</b>                                                                                                                                             |
|                               | <b>Number of Cases Allowed<sup>a</sup></b> | <b>393216</b>                                                                                                                                                  |

a. Based on availability of workspace memory.

### Descriptive Statistics

|                  | <b>N</b>  | <b>Mean</b> | <b>Std. Deviation</b> | <b>Minimum</b> | <b>Maximum</b> |
|------------------|-----------|-------------|-----------------------|----------------|----------------|
| <b>T5SHAS5.A</b> | <b>19</b> | <b>1.37</b> | <b>.684</b>           | <b>1</b>       | <b>3</b>       |
| <b>T4SHAS5.B</b> | <b>19</b> | <b>1.05</b> | <b>.229</b>           | <b>1</b>       | <b>2</b>       |
| <b>T4SHAS5.C</b> | <b>18</b> | <b>1.11</b> | <b>.323</b>           | <b>1</b>       | <b>2</b>       |

### Wilcoxon Signed Ranks Test

### Ranks

|                       |                | N               | Mean Rank | Sum of Ranks |
|-----------------------|----------------|-----------------|-----------|--------------|
| T4SHAS5.B - T5SHAS5.A | Negative Ranks | 5 <sup>a</sup>  | 3.70      | 18.50        |
|                       | Positive Ranks | 1 <sup>b</sup>  | 2.50      | 2.50         |
|                       | Ties           | 13 <sup>c</sup> |           |              |
|                       | Total          | 19              |           |              |
| T4SHAS5.C - T4SHAS5.B | Negative Ranks | 1 <sup>d</sup>  | 2.00      | 2.00         |
|                       | Positive Ranks | 2 <sup>e</sup>  | 2.00      | 4.00         |
|                       | Ties           | 15 <sup>f</sup> |           |              |
|                       | Total          | 18              |           |              |
| T5SHAS5.A - T4SHAS5.C | Negative Ranks | 1 <sup>g</sup>  | 2.50      | 2.50         |
|                       | Positive Ranks | 4 <sup>h</sup>  | 3.13      | 12.50        |
|                       | Ties           | 13 <sup>i</sup> |           |              |
|                       | Total          | 18              |           |              |

- a. T4SHAS5.B < T5SHAS5.A
- b. T4SHAS5.B > T5SHAS5.A
- c. T4SHAS5.B = T5SHAS5.A
- d. T4SHAS5.C < T4SHAS5.B
- e. T4SHAS5.C > T4SHAS5.B
- f. T4SHAS5.C = T4SHAS5.B
- g. T5SHAS5.A < T4SHAS5.C
- h. T5SHAS5.A > T4SHAS5.C
- i. T5SHAS5.A = T4SHAS5.C

### Test Statistics<sup>a</sup>

|                        | T4SHAS5.B -<br>T5SHAS5.A | T4SHAS5.C -<br>T4SHAS5.B | T5SHAS5.A -<br>T4SHAS5.C |
|------------------------|--------------------------|--------------------------|--------------------------|
| Z                      | -1.730 <sup>b</sup>      | -.577 <sup>c</sup>       | -1.414 <sup>c</sup>      |
| Asymp. Sig. (2-tailed) | .084                     | .564                     | .157                     |

- a. Wilcoxon Signed Ranks Test
- b. Based on positive ranks.
- c. Based on negative ranks.

### NPar Tests

### Notes

|                               |                                            |                                                                                                                                                                                     |
|-------------------------------|--------------------------------------------|-------------------------------------------------------------------------------------------------------------------------------------------------------------------------------------|
| <b>Output Created</b>         |                                            | <b>05-MAR-2025 21:25:37</b>                                                                                                                                                         |
| <b>Comments</b>               |                                            |                                                                                                                                                                                     |
| <b>Input</b>                  | <b>Data</b>                                | <b>/Users/dicec004/My Drive/WANA stuff/WANA Merged Data.sav</b>                                                                                                                     |
|                               | <b>Active Dataset</b>                      | <b>DataSet1</b>                                                                                                                                                                     |
|                               | <b>Filter</b>                              | <b>&lt;none&gt;</b>                                                                                                                                                                 |
|                               | <b>Weight</b>                              | <b>&lt;none&gt;</b>                                                                                                                                                                 |
|                               | <b>Split File</b>                          | <b>&lt;none&gt;</b>                                                                                                                                                                 |
|                               | <b>N of Rows in Working Data File</b>      | <b>20</b>                                                                                                                                                                           |
| <b>Missing Value Handling</b> | <b>Definition of Missing</b>               | <b>User-defined missing values are treated as missing.</b>                                                                                                                          |
|                               | <b>Cases Used</b>                          | <b>Statistics for each test are based on all cases with valid data for the variable(s) used in that test.</b>                                                                       |
| <b>Syntax</b>                 |                                            | <b>NPAR TESTS<br/>/WILCOXON=T5SHAS6.<br/>A T4SHAS6.B T4SHAS6.C<br/>WITH<br/>T4SHAS6.B T4SHAS6.<br/>C T5SHAS6.A (PAIRED)<br/>/STATISTICS<br/>DESCRIPTIVES<br/>/MISSING ANALYSIS.</b> |
| <b>Resources</b>              | <b>Processor Time</b>                      | <b>00:00:00.01</b>                                                                                                                                                                  |
|                               | <b>Elapsed Time</b>                        | <b>00:00:00.00</b>                                                                                                                                                                  |
|                               | <b>Number of Cases Allowed<sup>a</sup></b> | <b>393216</b>                                                                                                                                                                       |

a. Based on availability of workspace memory.

### Descriptive Statistics

|                  | <b>N</b>  | <b>Mean</b> | <b>Std. Deviation</b> | <b>Minimum</b> | <b>Maximum</b> |
|------------------|-----------|-------------|-----------------------|----------------|----------------|
| <b>T5SHAS6.A</b> | <b>19</b> | <b>1.21</b> | <b>.535</b>           | <b>1</b>       | <b>3</b>       |
| <b>T4SHAS6.B</b> | <b>19</b> | <b>1.00</b> | <b>.000</b>           | <b>1</b>       | <b>1</b>       |
| <b>T4SHAS6.C</b> | <b>18</b> | <b>1.06</b> | <b>.236</b>           | <b>1</b>       | <b>2</b>       |

### Wilcoxon Signed Ranks Test

### Ranks

|                       |                | N               | Mean Rank | Sum of Ranks |
|-----------------------|----------------|-----------------|-----------|--------------|
| T4SHAS6.B - T5SHAS6.A | Negative Ranks | 3 <sup>a</sup>  | 2.00      | 6.00         |
|                       | Positive Ranks | 0 <sup>b</sup>  | .00       | .00          |
|                       | Ties           | 16 <sup>c</sup> |           |              |
|                       | Total          | 19              |           |              |
| T4SHAS6.C - T4SHAS6.B | Negative Ranks | 0 <sup>d</sup>  | .00       | .00          |
|                       | Positive Ranks | 1 <sup>e</sup>  | 1.00      | 1.00         |
|                       | Ties           | 17 <sup>f</sup> |           |              |
|                       | Total          | 18              |           |              |
| T5SHAS6.A - T4SHAS6.C | Negative Ranks | 1 <sup>g</sup>  | 2.00      | 2.00         |
|                       | Positive Ranks | 2 <sup>h</sup>  | 2.00      | 4.00         |
|                       | Ties           | 15 <sup>i</sup> |           |              |
|                       | Total          | 18              |           |              |

- a. T4SHAS6.B < T5SHAS6.A
- b. T4SHAS6.B > T5SHAS6.A
- c. T4SHAS6.B = T5SHAS6.A
- d. T4SHAS6.C < T4SHAS6.B
- e. T4SHAS6.C > T4SHAS6.B
- f. T4SHAS6.C = T4SHAS6.B
- g. T5SHAS6.A < T4SHAS6.C
- h. T5SHAS6.A > T4SHAS6.C
- i. T5SHAS6.A = T4SHAS6.C

### Test Statistics<sup>a</sup>

|                        | T4SHAS6.B -<br>T5SHAS6.A | T4SHAS6.C -<br>T4SHAS6.B | T5SHAS6.A -<br>T4SHAS6.C |
|------------------------|--------------------------|--------------------------|--------------------------|
| Z                      | -1.633 <sup>b</sup>      | -1.000 <sup>c</sup>      | -.577 <sup>c</sup>       |
| Asymp. Sig. (2-tailed) | .102                     | .317                     | .564                     |

- a. Wilcoxon Signed Ranks Test
- b. Based on positive ranks.
- c. Based on negative ranks.

### NPar Tests

### Notes

|                               |                                            |                                                                                                                                                                         |
|-------------------------------|--------------------------------------------|-------------------------------------------------------------------------------------------------------------------------------------------------------------------------|
| <b>Output Created</b>         |                                            | <b>05-MAR-2025 21:25:37</b>                                                                                                                                             |
| <b>Comments</b>               |                                            |                                                                                                                                                                         |
| <b>Input</b>                  | <b>Data</b>                                | <b>/Users/dicec004/My Drive/WANA stuff/WANA Merged Data.sav</b>                                                                                                         |
|                               | <b>Active Dataset</b>                      | <b>DataSet1</b>                                                                                                                                                         |
|                               | <b>Filter</b>                              | <b>&lt;none&gt;</b>                                                                                                                                                     |
|                               | <b>Weight</b>                              | <b>&lt;none&gt;</b>                                                                                                                                                     |
|                               | <b>Split File</b>                          | <b>&lt;none&gt;</b>                                                                                                                                                     |
|                               | <b>N of Rows in Working Data File</b>      | <b>20</b>                                                                                                                                                               |
| <b>Missing Value Handling</b> | <b>Definition of Missing</b>               | <b>User-defined missing values are treated as missing.</b>                                                                                                              |
|                               | <b>Cases Used</b>                          | <b>Statistics for each test are based on all cases with valid data for the variable(s) used in that test.</b>                                                           |
| <b>Syntax</b>                 |                                            | <b>NPAR TESTS</b><br><br><b>/WILCOXON=T5SHAS10. A T4SHAS10.B T4SHAS10.C WITH T4SHAS10.B T4SHAS10.C T5SHAS10. A (PAIRED) /STATISTICS DESCRIPTIVES /MISSING ANALYSIS.</b> |
| <b>Resources</b>              | <b>Processor Time</b>                      | <b>00:00:00.01</b>                                                                                                                                                      |
|                               | <b>Elapsed Time</b>                        | <b>00:00:00.00</b>                                                                                                                                                      |
|                               | <b>Number of Cases Allowed<sup>a</sup></b> | <b>393216</b>                                                                                                                                                           |

a. Based on availability of workspace memory.

### Descriptive Statistics

|                   | <b>N</b>  | <b>Mean</b> | <b>Std. Deviation</b> | <b>Minimum</b> | <b>Maximum</b> |
|-------------------|-----------|-------------|-----------------------|----------------|----------------|
| <b>T5SHAS10.A</b> | <b>19</b> | <b>2.37</b> | <b>1.300</b>          | <b>1</b>       | <b>6</b>       |
| <b>T4SHAS10.B</b> | <b>19</b> | <b>1.00</b> | <b>.000</b>           | <b>1</b>       | <b>1</b>       |
| <b>T4SHAS10.C</b> | <b>18</b> | <b>1.56</b> | <b>.856</b>           | <b>1</b>       | <b>4</b>       |

### Wilcoxon Signed Ranks Test

### Ranks

|                         |                | N               | Mean Rank | Sum of Ranks |
|-------------------------|----------------|-----------------|-----------|--------------|
| T4SHAS10.B - T5SHAS10.A | Negative Ranks | 14 <sup>a</sup> | 7.50      | 105.00       |
|                         | Positive Ranks | 0 <sup>b</sup>  | .00       | .00          |
|                         | Ties           | 5 <sup>c</sup>  |           |              |
|                         | Total          | 19              |           |              |
| T4SHAS10.C - T4SHAS10.B | Negative Ranks | 0 <sup>d</sup>  | .00       | .00          |
|                         | Positive Ranks | 7 <sup>e</sup>  | 4.00      | 28.00        |
|                         | Ties           | 11 <sup>f</sup> |           |              |
|                         | Total          | 18              |           |              |
| T5SHAS10.A - T4SHAS10.C | Negative Ranks | 0 <sup>g</sup>  | .00       | .00          |
|                         | Positive Ranks | 10 <sup>h</sup> | 5.50      | 55.00        |
|                         | Ties           | 8 <sup>i</sup>  |           |              |
|                         | Total          | 18              |           |              |

- a. T4SHAS10.B < T5SHAS10.A
- b. T4SHAS10.B > T5SHAS10.A
- c. T4SHAS10.B = T5SHAS10.A
- d. T4SHAS10.C < T4SHAS10.B
- e. T4SHAS10.C > T4SHAS10.B
- f. T4SHAS10.C = T4SHAS10.B
- g. T5SHAS10.A < T4SHAS10.C
- h. T5SHAS10.A > T4SHAS10.C
- i. T5SHAS10.A = T4SHAS10.C

### Test Statistics<sup>a</sup>

|                        | T4SHAS10.B - T5SHAS10.A | T4SHAS10.C - T4SHAS10.B | T5SHAS10.A - T4SHAS10.C |
|------------------------|-------------------------|-------------------------|-------------------------|
| Z                      | -3.352 <sup>b</sup>     | -2.456 <sup>c</sup>     | -3.051 <sup>c</sup>     |
| Asymp. Sig. (2-tailed) | <.001                   | .014                    | .002                    |

- a. Wilcoxon Signed Ranks Test
- b. Based on positive ranks.
- c. Based on negative ranks.

### NPar Tests

### Notes

|                               |                                            |                                                                                                                                                                        |
|-------------------------------|--------------------------------------------|------------------------------------------------------------------------------------------------------------------------------------------------------------------------|
| <b>Output Created</b>         |                                            | <b>05-MAR-2025 21:25:37</b>                                                                                                                                            |
| <b>Comments</b>               |                                            |                                                                                                                                                                        |
| <b>Input</b>                  | <b>Data</b>                                | <b>/Users/dicec004/My Drive/WANA stuff/WANA Merged Data.sav</b>                                                                                                        |
|                               | <b>Active Dataset</b>                      | <b>DataSet1</b>                                                                                                                                                        |
|                               | <b>Filter</b>                              | <b>&lt;none&gt;</b>                                                                                                                                                    |
|                               | <b>Weight</b>                              | <b>&lt;none&gt;</b>                                                                                                                                                    |
|                               | <b>Split File</b>                          | <b>&lt;none&gt;</b>                                                                                                                                                    |
|                               | <b>N of Rows in Working Data File</b>      | <b>20</b>                                                                                                                                                              |
| <b>Missing Value Handling</b> | <b>Definition of Missing</b>               | <b>User-defined missing values are treated as missing.</b>                                                                                                             |
|                               | <b>Cases Used</b>                          | <b>Statistics for each test are based on all cases with valid data for the variable(s) used in that test.</b>                                                          |
| <b>Syntax</b>                 |                                            | <b>NPART TESTS</b><br><br><b>/WILCOXON=T5SHAS12.A T4SHAS12.B T4SHAS12.C WITH T4SHAS12.B T4SHAS12.C T5SHAS12.A (PAIRED) /STATISTICS DESCRIPTIVES /MISSING ANALYSIS.</b> |
| <b>Resources</b>              | <b>Processor Time</b>                      | <b>00:00:00.01</b>                                                                                                                                                     |
|                               | <b>Elapsed Time</b>                        | <b>00:00:00.00</b>                                                                                                                                                     |
|                               | <b>Number of Cases Allowed<sup>a</sup></b> | <b>393216</b>                                                                                                                                                          |

a. Based on availability of workspace memory.

### Descriptive Statistics

|                   | <b>N</b>  | <b>Mean</b> | <b>Std. Deviation</b> | <b>Minimum</b> | <b>Maximum</b> |
|-------------------|-----------|-------------|-----------------------|----------------|----------------|
| <b>T5SHAS12.A</b> | <b>19</b> | <b>1.84</b> | <b>1.068</b>          | <b>1</b>       | <b>4</b>       |
| <b>T4SHAS12.B</b> | <b>19</b> | <b>1.16</b> | <b>.375</b>           | <b>1</b>       | <b>2</b>       |
| <b>T4SHAS12.C</b> | <b>18</b> | <b>1.67</b> | <b>.907</b>           | <b>1</b>       | <b>4</b>       |

### Wilcoxon Signed Ranks Test

### Ranks

|                             |                | N               | Mean Rank | Sum of Ranks |
|-----------------------------|----------------|-----------------|-----------|--------------|
| T4SHAS12.B - T5SHAS12.<br>A | Negative Ranks | 7 <sup>a</sup>  | 4.00      | 28.00        |
|                             | Positive Ranks | 0 <sup>b</sup>  | .00       | .00          |
|                             | Ties           | 12 <sup>c</sup> |           |              |
|                             | Total          | 19              |           |              |
| T4SHAS12.C - T4SHAS12.<br>B | Negative Ranks | 2 <sup>d</sup>  | 4.50      | 9.00         |
|                             | Positive Ranks | 8 <sup>e</sup>  | 5.75      | 46.00        |
|                             | Ties           | 8 <sup>f</sup>  |           |              |
|                             | Total          | 18              |           |              |
| T5SHAS12.A - T4SHAS12.<br>C | Negative Ranks | 4 <sup>g</sup>  | 8.13      | 32.50        |
|                             | Positive Ranks | 8 <sup>h</sup>  | 5.69      | 45.50        |
|                             | Ties           | 6 <sup>i</sup>  |           |              |
|                             | Total          | 18              |           |              |

- a. T4SHAS12.B < T5SHAS12.A
- b. T4SHAS12.B > T5SHAS12.A
- c. T4SHAS12.B = T5SHAS12.A
- d. T4SHAS12.C < T4SHAS12.B
- e. T4SHAS12.C > T4SHAS12.B
- f. T4SHAS12.C = T4SHAS12.B
- g. T5SHAS12.A < T4SHAS12.C
- h. T5SHAS12.A > T4SHAS12.C
- i. T5SHAS12.A = T4SHAS12.C

### Test Statistics<sup>a</sup>

|                        | T4SHAS12.B -<br>T5SHAS12.A | T4SHAS12.C -<br>T4SHAS12.B | T5SHAS12.A -<br>T4SHAS12.C |
|------------------------|----------------------------|----------------------------|----------------------------|
| Z                      | -2.414 <sup>b</sup>        | -1.998 <sup>c</sup>        | -.535 <sup>c</sup>         |
| Asymp. Sig. (2-tailed) | .016                       | .046                       | .592                       |

- a. Wilcoxon Signed Ranks Test
- b. Based on positive ranks.
- c. Based on negative ranks.

### NPar Tests

### Notes

|                               |                                            |                                                                                                                                                                        |
|-------------------------------|--------------------------------------------|------------------------------------------------------------------------------------------------------------------------------------------------------------------------|
| <b>Output Created</b>         |                                            | <b>05-MAR-2025 21:25:37</b>                                                                                                                                            |
| <b>Comments</b>               |                                            |                                                                                                                                                                        |
| <b>Input</b>                  | <b>Data</b>                                | <b>/Users/dicec004/My Drive/WANA stuff/WANA Merged Data.sav</b>                                                                                                        |
|                               | <b>Active Dataset</b>                      | <b>DataSet1</b>                                                                                                                                                        |
|                               | <b>Filter</b>                              | <b>&lt;none&gt;</b>                                                                                                                                                    |
|                               | <b>Weight</b>                              | <b>&lt;none&gt;</b>                                                                                                                                                    |
|                               | <b>Split File</b>                          | <b>&lt;none&gt;</b>                                                                                                                                                    |
|                               | <b>N of Rows in Working Data File</b>      | <b>20</b>                                                                                                                                                              |
| <b>Missing Value Handling</b> | <b>Definition of Missing</b>               | <b>User-defined missing values are treated as missing.</b>                                                                                                             |
|                               | <b>Cases Used</b>                          | <b>Statistics for each test are based on all cases with valid data for the variable(s) used in that test.</b>                                                          |
| <b>Syntax</b>                 |                                            | <b>NPART TESTS</b><br><br><b>/WILCOXON=T5SHAS13.A T4SHAS13.B T4SHAS13.C WITH T4SHAS13.B T4SHAS13.C T5SHAS13.A (PAIRED) /STATISTICS DESCRIPTIVES /MISSING ANALYSIS.</b> |
| <b>Resources</b>              | <b>Processor Time</b>                      | <b>00:00:00.01</b>                                                                                                                                                     |
|                               | <b>Elapsed Time</b>                        | <b>00:00:00.00</b>                                                                                                                                                     |
|                               | <b>Number of Cases Allowed<sup>a</sup></b> | <b>393216</b>                                                                                                                                                          |

a. Based on availability of workspace memory.

### Descriptive Statistics

|                   | <b>N</b>  | <b>Mean</b> | <b>Std. Deviation</b> | <b>Minimum</b> | <b>Maximum</b> |
|-------------------|-----------|-------------|-----------------------|----------------|----------------|
| <b>T5SHAS13.A</b> | <b>19</b> | <b>1.84</b> | <b>1.385</b>          | <b>1</b>       | <b>6</b>       |
| <b>T4SHAS13.B</b> | <b>19</b> | <b>1.11</b> | <b>.315</b>           | <b>1</b>       | <b>2</b>       |
| <b>T4SHAS13.C</b> | <b>18</b> | <b>1.33</b> | <b>.594</b>           | <b>1</b>       | <b>3</b>       |

### Wilcoxon Signed Ranks Test

### Ranks

|                             |                | N               | Mean Rank | Sum of Ranks |
|-----------------------------|----------------|-----------------|-----------|--------------|
| T4SHAS13.B - T5SHAS13.<br>A | Negative Ranks | 6 <sup>a</sup>  | 4.42      | 26.50        |
|                             | Positive Ranks | 1 <sup>b</sup>  | 1.50      | 1.50         |
|                             | Ties           | 12 <sup>c</sup> |           |              |
|                             | Total          | 19              |           |              |
| T4SHAS13.C - T4SHAS13.<br>B | Negative Ranks | 0 <sup>d</sup>  | .00       | .00          |
|                             | Positive Ranks | 3 <sup>e</sup>  | 2.00      | 6.00         |
|                             | Ties           | 15 <sup>f</sup> |           |              |
|                             | Total          | 18              |           |              |
| T5SHAS13.A - T4SHAS13.<br>C | Negative Ranks | 3 <sup>g</sup>  | 2.50      | 7.50         |
|                             | Positive Ranks | 4 <sup>h</sup>  | 5.13      | 20.50        |
|                             | Ties           | 11 <sup>i</sup> |           |              |
|                             | Total          | 18              |           |              |

- a. T4SHAS13.B < T5SHAS13.A
- b. T4SHAS13.B > T5SHAS13.A
- c. T4SHAS13.B = T5SHAS13.A
- d. T4SHAS13.C < T4SHAS13.B
- e. T4SHAS13.C > T4SHAS13.B
- f. T4SHAS13.C = T4SHAS13.B
- g. T5SHAS13.A < T4SHAS13.C
- h. T5SHAS13.A > T4SHAS13.C
- i. T5SHAS13.A = T4SHAS13.C

### Test Statistics<sup>a</sup>

|                        | T4SHAS13.B -<br>T5SHAS13.A | T4SHAS13.C -<br>T4SHAS13.B | T5SHAS13.A -<br>T4SHAS13.C |
|------------------------|----------------------------|----------------------------|----------------------------|
| Z                      | -2.132 <sup>b</sup>        | -1.633 <sup>c</sup>        | -1.121 <sup>c</sup>        |
| Asymp. Sig. (2-tailed) | .033                       | .102                       | .262                       |

- a. Wilcoxon Signed Ranks Test
- b. Based on positive ranks.
- c. Based on negative ranks.

### NPar Tests

### Notes

|                               |                                            |                                                                                                                                                                                      |
|-------------------------------|--------------------------------------------|--------------------------------------------------------------------------------------------------------------------------------------------------------------------------------------|
| <b>Output Created</b>         |                                            | <b>05-MAR-2025 21:25:37</b>                                                                                                                                                          |
| <b>Comments</b>               |                                            |                                                                                                                                                                                      |
| <b>Input</b>                  | <b>Data</b>                                | <b>/Users/dicec004/My Drive/WANA stuff/WANA Merged Data.sav</b>                                                                                                                      |
|                               | <b>Active Dataset</b>                      | <b>DataSet1</b>                                                                                                                                                                      |
|                               | <b>Filter</b>                              | <b>&lt;none&gt;</b>                                                                                                                                                                  |
|                               | <b>Weight</b>                              | <b>&lt;none&gt;</b>                                                                                                                                                                  |
|                               | <b>Split File</b>                          | <b>&lt;none&gt;</b>                                                                                                                                                                  |
|                               | <b>N of Rows in Working Data File</b>      | <b>20</b>                                                                                                                                                                            |
| <b>Missing Value Handling</b> | <b>Definition of Missing</b>               | <b>User-defined missing values are treated as missing.</b>                                                                                                                           |
|                               | <b>Cases Used</b>                          | <b>Statistics for each test are based on all cases with valid data for the variable(s) used in that test.</b>                                                                        |
| <b>Syntax</b>                 |                                            | <b>NPART TESTS<br/>/WILCOXON=T6DRUID.<br/>A T7DRUID.B T3DRUID.C<br/>WITH<br/>T7DRUID.B T3DRUID.<br/>C T6DRUID.A (PAIRED)<br/>/STATISTICS<br/>DESCRIPTIVES<br/>/MISSING ANALYSIS.</b> |
| <b>Resources</b>              | <b>Processor Time</b>                      | <b>00:00:00.01</b>                                                                                                                                                                   |
|                               | <b>Elapsed Time</b>                        | <b>00:00:00.00</b>                                                                                                                                                                   |
|                               | <b>Number of Cases Allowed<sup>a</sup></b> | <b>393216</b>                                                                                                                                                                        |

a. Based on availability of workspace memory.

### Descriptive Statistics

|                  | <b>N</b>  | <b>Mean</b>   | <b>Std. Deviation</b> | <b>Minimum</b> | <b>Maximum</b> |
|------------------|-----------|---------------|-----------------------|----------------|----------------|
| <b>T6DRUID.A</b> | <b>20</b> | <b>43.890</b> | <b>5.7303</b>         | <b>36.4</b>    | <b>55.8</b>    |
| <b>T7DRUID.B</b> | <b>20</b> | <b>42.415</b> | <b>5.6354</b>         | <b>36.4</b>    | <b>56.6</b>    |
| <b>T3DRUID.C</b> | <b>18</b> | <b>43.122</b> | <b>5.3266</b>         | <b>34.8</b>    | <b>56.1</b>    |

### Wilcoxon Signed Ranks Test

### Ranks

|                       |                | N               | Mean Rank | Sum of Ranks |
|-----------------------|----------------|-----------------|-----------|--------------|
| T7DRUID.B - T6DRUID.A | Negative Ranks | 13 <sup>a</sup> | 11.35     | 147.50       |
|                       | Positive Ranks | 7 <sup>b</sup>  | 8.93      | 62.50        |
|                       | Ties           | 0 <sup>c</sup>  |           |              |
|                       | Total          | 20              |           |              |
| T3DRUID.C - T7DRUID.B | Negative Ranks | 9 <sup>d</sup>  | 8.61      | 77.50        |
|                       | Positive Ranks | 9 <sup>e</sup>  | 10.39     | 93.50        |
|                       | Ties           | 0 <sup>f</sup>  |           |              |
|                       | Total          | 18              |           |              |
| T6DRUID.A - T3DRUID.C | Negative Ranks | 8 <sup>g</sup>  | 8.88      | 71.00        |
|                       | Positive Ranks | 10 <sup>h</sup> | 10.00     | 100.00       |
|                       | Ties           | 0 <sup>i</sup>  |           |              |
|                       | Total          | 18              |           |              |

- a. T7DRUID.B < T6DRUID.A
- b. T7DRUID.B > T6DRUID.A
- c. T7DRUID.B = T6DRUID.A
- d. T3DRUID.C < T7DRUID.B
- e. T3DRUID.C > T7DRUID.B
- f. T3DRUID.C = T7DRUID.B
- g. T6DRUID.A < T3DRUID.C
- h. T6DRUID.A > T3DRUID.C
- i. T6DRUID.A = T3DRUID.C

### Test Statistics<sup>a</sup>

|                        | T7DRUID.B -<br>T6DRUID.A | T3DRUID.C -<br>T7DRUID.B | T6DRUID.A -<br>T3DRUID.C |
|------------------------|--------------------------|--------------------------|--------------------------|
| Z                      | -1.587 <sup>b</sup>      | -.348 <sup>c</sup>       | -.632 <sup>c</sup>       |
| Asymp. Sig. (2-tailed) | .113                     | .728                     | .528                     |

- a. Wilcoxon Signed Ranks Test
- b. Based on positive ranks.
- c. Based on negative ranks.

### NPar Tests

### Notes

|                               |                                            |                                                                                                                                                                                      |
|-------------------------------|--------------------------------------------|--------------------------------------------------------------------------------------------------------------------------------------------------------------------------------------|
| <b>Output Created</b>         |                                            | <b>05-MAR-2025 21:25:37</b>                                                                                                                                                          |
| <b>Comments</b>               |                                            |                                                                                                                                                                                      |
| <b>Input</b>                  | <b>Data</b>                                | <b>/Users/dicec004/My Drive/WANA stuff/WANA Merged Data.sav</b>                                                                                                                      |
|                               | <b>Active Dataset</b>                      | <b>DataSet1</b>                                                                                                                                                                      |
|                               | <b>Filter</b>                              | <b>&lt;none&gt;</b>                                                                                                                                                                  |
|                               | <b>Weight</b>                              | <b>&lt;none&gt;</b>                                                                                                                                                                  |
|                               | <b>Split File</b>                          | <b>&lt;none&gt;</b>                                                                                                                                                                  |
|                               | <b>N of Rows in Working Data File</b>      | <b>20</b>                                                                                                                                                                            |
| <b>Missing Value Handling</b> | <b>Definition of Missing</b>               | <b>User-defined missing values are treated as missing.</b>                                                                                                                           |
|                               | <b>Cases Used</b>                          | <b>Statistics for each test are based on all cases with valid data for the variable(s) used in that test.</b>                                                                        |
| <b>Syntax</b>                 |                                            | <b>NPART TESTS<br/>/WILCOXON=T5SHAS4.<br/>A T5SHAS4.B T7SHAS4.C<br/>WITH<br/>T5SHAS4.B T7SHAS4.<br/>C T5SHAS4.A (PAIRED)<br/>/STATISTICS<br/>DESCRIPTIVES<br/>/MISSING ANALYSIS.</b> |
| <b>Resources</b>              | <b>Processor Time</b>                      | <b>00:00:00.01</b>                                                                                                                                                                   |
|                               | <b>Elapsed Time</b>                        | <b>00:00:00.00</b>                                                                                                                                                                   |
|                               | <b>Number of Cases Allowed<sup>a</sup></b> | <b>393216</b>                                                                                                                                                                        |

a. Based on availability of workspace memory.

### Descriptive Statistics

|                  | <b>N</b>  | <b>Mean</b> | <b>Std. Deviation</b> | <b>Minimum</b> | <b>Maximum</b> |
|------------------|-----------|-------------|-----------------------|----------------|----------------|
| <b>T5SHAS4.A</b> | <b>19</b> | <b>1.37</b> | <b>.684</b>           | <b>1</b>       | <b>3</b>       |
| <b>T5SHAS4.B</b> | <b>19</b> | <b>1.11</b> | <b>.459</b>           | <b>1</b>       | <b>3</b>       |
| <b>T7SHAS4.C</b> | <b>18</b> | <b>1.44</b> | <b>.784</b>           | <b>1</b>       | <b>3</b>       |

### Wilcoxon Signed Ranks Test

### Ranks

|                       |                | N               | Mean Rank | Sum of Ranks |
|-----------------------|----------------|-----------------|-----------|--------------|
| T5SHAS4.B - T5SHAS4.A | Negative Ranks | 4 <sup>a</sup>  | 2.50      | 10.00        |
|                       | Positive Ranks | 0 <sup>b</sup>  | .00       | .00          |
|                       | Ties           | 15 <sup>c</sup> |           |              |
|                       | Total          | 19              |           |              |
| T7SHAS4.C - T5SHAS4.B | Negative Ranks | 1 <sup>d</sup>  | 4.50      | 4.50         |
|                       | Positive Ranks | 5 <sup>e</sup>  | 3.30      | 16.50        |
|                       | Ties           | 12 <sup>f</sup> |           |              |
|                       | Total          | 18              |           |              |
| T5SHAS4.A - T7SHAS4.C | Negative Ranks | 5 <sup>g</sup>  | 3.00      | 15.00        |
|                       | Positive Ranks | 1 <sup>h</sup>  | 6.00      | 6.00         |
|                       | Ties           | 12 <sup>i</sup> |           |              |
|                       | Total          | 18              |           |              |

- a. T5SHAS4.B < T5SHAS4.A
- b. T5SHAS4.B > T5SHAS4.A
- c. T5SHAS4.B = T5SHAS4.A
- d. T7SHAS4.C < T5SHAS4.B
- e. T7SHAS4.C > T5SHAS4.B
- f. T7SHAS4.C = T5SHAS4.B
- g. T5SHAS4.A < T7SHAS4.C
- h. T5SHAS4.A > T7SHAS4.C
- i. T5SHAS4.A = T7SHAS4.C

### Test Statistics<sup>a</sup>

|                        | T5SHAS4.B -<br>T5SHAS4.A | T7SHAS4.C -<br>T5SHAS4.B | T5SHAS4.A -<br>T7SHAS4.C |
|------------------------|--------------------------|--------------------------|--------------------------|
| Z                      | -1.890 <sup>b</sup>      | -1.298 <sup>c</sup>      | -1.000 <sup>b</sup>      |
| Asymp. Sig. (2-tailed) | .059                     | .194                     | .317                     |

- a. Wilcoxon Signed Ranks Test
- b. Based on positive ranks.
- c. Based on negative ranks.

### NPar Tests

### Notes

|                               |                                            |                                                                                                                                                            |
|-------------------------------|--------------------------------------------|------------------------------------------------------------------------------------------------------------------------------------------------------------|
| <b>Output Created</b>         |                                            | <b>05-MAR-2025 21:25:37</b>                                                                                                                                |
| <b>Comments</b>               |                                            |                                                                                                                                                            |
| <b>Input</b>                  | <b>Data</b>                                | <b>/Users/dicec004/My Drive/WANA stuff/WANA Merged Data.sav</b>                                                                                            |
|                               | <b>Active Dataset</b>                      | <b>DataSet1</b>                                                                                                                                            |
|                               | <b>Filter</b>                              | <b>&lt;none&gt;</b>                                                                                                                                        |
|                               | <b>Weight</b>                              | <b>&lt;none&gt;</b>                                                                                                                                        |
|                               | <b>Split File</b>                          | <b>&lt;none&gt;</b>                                                                                                                                        |
|                               | <b>N of Rows in Working Data File</b>      | <b>20</b>                                                                                                                                                  |
| <b>Missing Value Handling</b> | <b>Definition of Missing</b>               | <b>User-defined missing values are treated as missing.</b>                                                                                                 |
|                               | <b>Cases Used</b>                          | <b>Statistics for each test are based on all cases with valid data for the variable(s) used in that test.</b>                                              |
| <b>Syntax</b>                 |                                            | <b>NPART TESTS<br/>/WILCOXON=T5SHAS5.A T4SHAS5.B T7SHAS5.C WITH T4SHAS5.B T7SHAS5.C T5SHAS5.A (PAIRED)<br/>/STATISTICS DESCRIPTIVES /MISSING ANALYSIS.</b> |
| <b>Resources</b>              | <b>Processor Time</b>                      | <b>00:00:00.01</b>                                                                                                                                         |
|                               | <b>Elapsed Time</b>                        | <b>00:00:00.00</b>                                                                                                                                         |
|                               | <b>Number of Cases Allowed<sup>a</sup></b> | <b>393216</b>                                                                                                                                              |

a. Based on availability of workspace memory.

### Descriptive Statistics

|                  | <b>N</b>  | <b>Mean</b> | <b>Std. Deviation</b> | <b>Minimum</b> | <b>Maximum</b> |
|------------------|-----------|-------------|-----------------------|----------------|----------------|
| <b>T5SHAS5.A</b> | <b>19</b> | <b>1.37</b> | <b>.684</b>           | <b>1</b>       | <b>3</b>       |
| <b>T4SHAS5.B</b> | <b>19</b> | <b>1.05</b> | <b>.229</b>           | <b>1</b>       | <b>2</b>       |
| <b>T7SHAS5.C</b> | <b>18</b> | <b>1.11</b> | <b>.323</b>           | <b>1</b>       | <b>2</b>       |

### Wilcoxon Signed Ranks Test

### Ranks

|                       |                | N               | Mean Rank | Sum of Ranks |
|-----------------------|----------------|-----------------|-----------|--------------|
| T4SHAS5.B - T5SHAS5.A | Negative Ranks | 5 <sup>a</sup>  | 3.70      | 18.50        |
|                       | Positive Ranks | 1 <sup>b</sup>  | 2.50      | 2.50         |
|                       | Ties           | 13 <sup>c</sup> |           |              |
|                       | Total          | 19              |           |              |
| T7SHAS5.C - T4SHAS5.B | Negative Ranks | 1 <sup>d</sup>  | 2.00      | 2.00         |
|                       | Positive Ranks | 2 <sup>e</sup>  | 2.00      | 4.00         |
|                       | Ties           | 15 <sup>f</sup> |           |              |
|                       | Total          | 18              |           |              |
| T5SHAS5.A - T7SHAS5.C | Negative Ranks | 2 <sup>g</sup>  | 2.50      | 5.00         |
|                       | Positive Ranks | 4 <sup>h</sup>  | 4.00      | 16.00        |
|                       | Ties           | 12 <sup>i</sup> |           |              |
|                       | Total          | 18              |           |              |

- a. T4SHAS5.B < T5SHAS5.A
- b. T4SHAS5.B > T5SHAS5.A
- c. T4SHAS5.B = T5SHAS5.A
- d. T7SHAS5.C < T4SHAS5.B
- e. T7SHAS5.C > T4SHAS5.B
- f. T7SHAS5.C = T4SHAS5.B
- g. T5SHAS5.A < T7SHAS5.C
- h. T5SHAS5.A > T7SHAS5.C
- i. T5SHAS5.A = T7SHAS5.C

### Test Statistics<sup>a</sup>

|                        | T4SHAS5.B -<br>T5SHAS5.A | T7SHAS5.C -<br>T4SHAS5.B | T5SHAS5.A -<br>T7SHAS5.C |
|------------------------|--------------------------|--------------------------|--------------------------|
| Z                      | -1.730 <sup>b</sup>      | -.577 <sup>c</sup>       | -1.190 <sup>c</sup>      |
| Asymp. Sig. (2-tailed) | .084                     | .564                     | .234                     |

- a. Wilcoxon Signed Ranks Test
- b. Based on positive ranks.
- c. Based on negative ranks.

### NPar Tests

### Notes

|                               |                                            |                                                                                                                                                                                    |
|-------------------------------|--------------------------------------------|------------------------------------------------------------------------------------------------------------------------------------------------------------------------------------|
| <b>Output Created</b>         |                                            | <b>05-MAR-2025 21:25:37</b>                                                                                                                                                        |
| <b>Comments</b>               |                                            |                                                                                                                                                                                    |
| <b>Input</b>                  | <b>Data</b>                                | <b>/Users/dicec004/My Drive/WANA stuff/WANA Merged Data.sav</b>                                                                                                                    |
|                               | <b>Active Dataset</b>                      | <b>DataSet1</b>                                                                                                                                                                    |
|                               | <b>Filter</b>                              | <b>&lt;none&gt;</b>                                                                                                                                                                |
|                               | <b>Weight</b>                              | <b>&lt;none&gt;</b>                                                                                                                                                                |
|                               | <b>Split File</b>                          | <b>&lt;none&gt;</b>                                                                                                                                                                |
|                               | <b>N of Rows in Working Data File</b>      | <b>20</b>                                                                                                                                                                          |
| <b>Missing Value Handling</b> | <b>Definition of Missing</b>               | <b>User-defined missing values are treated as missing.</b>                                                                                                                         |
|                               | <b>Cases Used</b>                          | <b>Statistics for each test are based on all cases with valid data for the variable(s) used in that test.</b>                                                                      |
| <b>Syntax</b>                 |                                            | <b>NPARTESTS<br/>/WILCOXON=T8SHAS6.<br/>A T1SHAS6.B T7SHAS6.C<br/>WITH<br/>T1SHAS6.B T7SHAS6.<br/>C T8SHAS6.A (PAIRED)<br/>/STATISTICS<br/>DESCRIPTIVES<br/>/MISSING ANALYSIS.</b> |
| <b>Resources</b>              | <b>Processor Time</b>                      | <b>00:00:00.01</b>                                                                                                                                                                 |
|                               | <b>Elapsed Time</b>                        | <b>00:00:00.00</b>                                                                                                                                                                 |
|                               | <b>Number of Cases Allowed<sup>a</sup></b> | <b>393216</b>                                                                                                                                                                      |

a. Based on availability of workspace memory.

### Descriptive Statistics

|                  | <b>N</b>  | <b>Mean</b> | <b>Std. Deviation</b> | <b>Minimum</b> | <b>Maximum</b> |
|------------------|-----------|-------------|-----------------------|----------------|----------------|
| <b>T8SHAS6.A</b> | <b>19</b> | <b>1.32</b> | <b>.820</b>           | <b>1</b>       | <b>4</b>       |
| <b>T1SHAS6.B</b> | <b>18</b> | <b>1.00</b> | <b>.000</b>           | <b>1</b>       | <b>1</b>       |
| <b>T7SHAS6.C</b> | <b>17</b> | <b>1.18</b> | <b>.393</b>           | <b>1</b>       | <b>2</b>       |

### Wilcoxon Signed Ranks Test

### Ranks

|                       |                | N               | Mean Rank | Sum of Ranks |
|-----------------------|----------------|-----------------|-----------|--------------|
| T1SHAS6.B - T8SHAS6.A | Negative Ranks | 3 <sup>a</sup>  | 2.00      | 6.00         |
|                       | Positive Ranks | 0 <sup>b</sup>  | .00       | .00          |
|                       | Ties           | 15 <sup>c</sup> |           |              |
|                       | Total          | 18              |           |              |
| T7SHAS6.C - T1SHAS6.B | Negative Ranks | 0 <sup>d</sup>  | .00       | .00          |
|                       | Positive Ranks | 3 <sup>e</sup>  | 2.00      | 6.00         |
|                       | Ties           | 13 <sup>f</sup> |           |              |
|                       | Total          | 16              |           |              |
| T8SHAS6.A - T7SHAS6.C | Negative Ranks | 1 <sup>g</sup>  | 1.50      | 1.50         |
|                       | Positive Ranks | 1 <sup>h</sup>  | 1.50      | 1.50         |
|                       | Ties           | 15 <sup>i</sup> |           |              |
|                       | Total          | 17              |           |              |

- a. T1SHAS6.B < T8SHAS6.A
- b. T1SHAS6.B > T8SHAS6.A
- c. T1SHAS6.B = T8SHAS6.A
- d. T7SHAS6.C < T1SHAS6.B
- e. T7SHAS6.C > T1SHAS6.B
- f. T7SHAS6.C = T1SHAS6.B
- g. T8SHAS6.A < T7SHAS6.C
- h. T8SHAS6.A > T7SHAS6.C
- i. T8SHAS6.A = T7SHAS6.C

### Test Statistics<sup>a</sup>

|                        | T1SHAS6.B -<br>T8SHAS6.A | T7SHAS6.C -<br>T1SHAS6.B | T8SHAS6.A -<br>T7SHAS6.C |
|------------------------|--------------------------|--------------------------|--------------------------|
| Z                      | -1.604 <sup>b</sup>      | -1.732 <sup>c</sup>      | .000 <sup>d</sup>        |
| Asymp. Sig. (2-tailed) | .109                     | .083                     | 1.000                    |

- a. Wilcoxon Signed Ranks Test
- b. Based on positive ranks.
- c. Based on negative ranks.
- d. The sum of negative ranks equals the sum of positive ranks.

### NPar Tests

### Notes

|                               |                                            |                                                                                                                                                                       |
|-------------------------------|--------------------------------------------|-----------------------------------------------------------------------------------------------------------------------------------------------------------------------|
| <b>Output Created</b>         |                                            | <b>05-MAR-2025 21:25:37</b>                                                                                                                                           |
| <b>Comments</b>               |                                            |                                                                                                                                                                       |
| <b>Input</b>                  | <b>Data</b>                                | <b>/Users/dicec004/My Drive/WANA stuff/WANA Merged Data.sav</b>                                                                                                       |
|                               | <b>Active Dataset</b>                      | <b>DataSet1</b>                                                                                                                                                       |
|                               | <b>Filter</b>                              | <b>&lt;none&gt;</b>                                                                                                                                                   |
|                               | <b>Weight</b>                              | <b>&lt;none&gt;</b>                                                                                                                                                   |
|                               | <b>Split File</b>                          | <b>&lt;none&gt;</b>                                                                                                                                                   |
|                               | <b>N of Rows in Working Data File</b>      | <b>20</b>                                                                                                                                                             |
| <b>Missing Value Handling</b> | <b>Definition of Missing</b>               | <b>User-defined missing values are treated as missing.</b>                                                                                                            |
|                               | <b>Cases Used</b>                          | <b>Statistics for each test are based on all cases with valid data for the variable(s) used in that test.</b>                                                         |
| <b>Syntax</b>                 |                                            | <b>NPAR TESTS</b><br><br><b>/WILCOXON=T6SHAS10.A T7SHAS10.B T7SHAS10.C WITH T7SHAS10.B T7SHAS10.C T6SHAS10.A (PAIRED) /STATISTICS DESCRIPTIVES /MISSING ANALYSIS.</b> |
| <b>Resources</b>              | <b>Processor Time</b>                      | <b>00:00:00.01</b>                                                                                                                                                    |
|                               | <b>Elapsed Time</b>                        | <b>00:00:00.00</b>                                                                                                                                                    |
|                               | <b>Number of Cases Allowed<sup>a</sup></b> | <b>393216</b>                                                                                                                                                         |

a. Based on availability of workspace memory.

### Descriptive Statistics

|                   | <b>N</b>  | <b>Mean</b> | <b>Std. Deviation</b> | <b>Minimum</b> | <b>Maximum</b> |
|-------------------|-----------|-------------|-----------------------|----------------|----------------|
| <b>T6SHAS10.A</b> | <b>19</b> | <b>2.21</b> | <b>1.548</b>          | <b>1</b>       | <b>6</b>       |
| <b>T7SHAS10.B</b> | <b>19</b> | <b>1.32</b> | <b>1.003</b>          | <b>1</b>       | <b>5</b>       |
| <b>T7SHAS10.C</b> | <b>18</b> | <b>2.28</b> | <b>1.447</b>          | <b>1</b>       | <b>6</b>       |

### Wilcoxon Signed Ranks Test

### Ranks

|                              |                | N               | Mean Rank | Sum of Ranks |
|------------------------------|----------------|-----------------|-----------|--------------|
| T7SHAS10.B - T6SHAS10.A<br>A | Negative Ranks | 9 <sup>a</sup>  | 6.17      | 55.50        |
|                              | Positive Ranks | 2 <sup>b</sup>  | 5.25      | 10.50        |
|                              | Ties           | 8 <sup>c</sup>  |           |              |
|                              | Total          | 19              |           |              |
| T7SHAS10.C - T7SHAS10.B<br>B | Negative Ranks | 0 <sup>d</sup>  | .00       | .00          |
|                              | Positive Ranks | 10 <sup>e</sup> | 5.50      | 55.00        |
|                              | Ties           | 8 <sup>f</sup>  |           |              |
|                              | Total          | 18              |           |              |
| T6SHAS10.A - T7SHAS10.C<br>C | Negative Ranks | 6 <sup>g</sup>  | 4.83      | 29.00        |
|                              | Positive Ranks | 3 <sup>h</sup>  | 5.33      | 16.00        |
|                              | Ties           | 9 <sup>i</sup>  |           |              |
|                              | Total          | 18              |           |              |

- a. T7SHAS10.B < T6SHAS10.A
- b. T7SHAS10.B > T6SHAS10.A
- c. T7SHAS10.B = T6SHAS10.A
- d. T7SHAS10.C < T7SHAS10.B
- e. T7SHAS10.C > T7SHAS10.B
- f. T7SHAS10.C = T7SHAS10.B
- g. T6SHAS10.A < T7SHAS10.C
- h. T6SHAS10.A > T7SHAS10.C
- i. T6SHAS10.A = T7SHAS10.C

### Test Statistics<sup>a</sup>

|                        | T7SHAS10.B - T6SHAS10.A | T7SHAS10.C - T7SHAS10.B | T6SHAS10.A - T7SHAS10.C |
|------------------------|-------------------------|-------------------------|-------------------------|
| Z                      | -2.032 <sup>b</sup>     | -2.877 <sup>c</sup>     | -.785 <sup>b</sup>      |
| Asymp. Sig. (2-tailed) | .042                    | .004                    | .432                    |

- a. Wilcoxon Signed Ranks Test
- b. Based on positive ranks.
- c. Based on negative ranks.

### NPar Tests

### Notes

|                               |                                            |                                                                                                                                                                                    |
|-------------------------------|--------------------------------------------|------------------------------------------------------------------------------------------------------------------------------------------------------------------------------------|
| <b>Output Created</b>         |                                            | <b>05-MAR-2025 21:25:37</b>                                                                                                                                                        |
| <b>Comments</b>               |                                            |                                                                                                                                                                                    |
| <b>Input</b>                  | <b>Data</b>                                | /Users/dicec004/My Drive/WANA stuff/WANA Merged Data.sav                                                                                                                           |
|                               | <b>Active Dataset</b>                      | DataSet1                                                                                                                                                                           |
|                               | <b>Filter</b>                              | <none>                                                                                                                                                                             |
|                               | <b>Weight</b>                              | <none>                                                                                                                                                                             |
|                               | <b>Split File</b>                          | <none>                                                                                                                                                                             |
|                               | <b>N of Rows in Working Data File</b>      | <b>20</b>                                                                                                                                                                          |
| <b>Missing Value Handling</b> | <b>Definition of Missing</b>               | User-defined missing values are treated as missing.                                                                                                                                |
|                               | <b>Cases Used</b>                          | Statistics for each test are based on all cases with valid data for the variable(s) used in that test.                                                                             |
| <b>Syntax</b>                 |                                            | <pre> NPAR TESTS  /WILCOXON=T8SHAS12. A T11SHAS12.B T6SHAS12.C   WITH   T11SHAS12.B T6SHAS12.C T8SHAS12. A (PAIRED)   /STATISTICS DESCRIPTIVES /MISSING ANALYSIS.           </pre> |
| <b>Resources</b>              | <b>Processor Time</b>                      | <b>00:00:00.01</b>                                                                                                                                                                 |
|                               | <b>Elapsed Time</b>                        | <b>00:00:00.00</b>                                                                                                                                                                 |
|                               | <b>Number of Cases Allowed<sup>a</sup></b> | <b>393216</b>                                                                                                                                                                      |

a. Based on availability of workspace memory.

### Descriptive Statistics

|                    | <b>N</b>  | <b>Mean</b> | <b>Std. Deviation</b> | <b>Minimum</b> | <b>Maximum</b> |
|--------------------|-----------|-------------|-----------------------|----------------|----------------|
| <b>T8SHAS12.A</b>  | <b>19</b> | <b>2.37</b> | <b>1.832</b>          | <b>1</b>       | <b>8</b>       |
| <b>T11SHAS12.B</b> | <b>18</b> | <b>1.39</b> | <b>.778</b>           | <b>1</b>       | <b>4</b>       |
| <b>T6SHAS12.C</b>  | <b>18</b> | <b>2.17</b> | <b>1.543</b>          | <b>1</b>       | <b>6</b>       |

### Wilcoxon Signed Ranks Test

### Ranks

|                             |                | N               | Mean Rank | Sum of Ranks |
|-----------------------------|----------------|-----------------|-----------|--------------|
| T11SHAS12.B -<br>T8SHAS12.A | Negative Ranks | 9 <sup>a</sup>  | 5.00      | 45.00        |
|                             | Positive Ranks | 0 <sup>b</sup>  | .00       | .00          |
|                             | Ties           | 9 <sup>c</sup>  |           |              |
|                             | Total          | 18              |           |              |
| T6SHAS12.C -<br>T11SHAS12.B | Negative Ranks | 0 <sup>d</sup>  | .00       | .00          |
|                             | Positive Ranks | 8 <sup>e</sup>  | 4.50      | 36.00        |
|                             | Ties           | 9 <sup>f</sup>  |           |              |
|                             | Total          | 17              |           |              |
| T8SHAS12.A - T6SHAS12.<br>C | Negative Ranks | 3 <sup>g</sup>  | 3.17      | 9.50         |
|                             | Positive Ranks | 2 <sup>h</sup>  | 2.75      | 5.50         |
|                             | Ties           | 13 <sup>i</sup> |           |              |
|                             | Total          | 18              |           |              |

- a. T11SHAS12.B < T8SHAS12.A
- b. T11SHAS12.B > T8SHAS12.A
- c. T11SHAS12.B = T8SHAS12.A
- d. T6SHAS12.C < T11SHAS12.B
- e. T6SHAS12.C > T11SHAS12.B
- f. T6SHAS12.C = T11SHAS12.B
- g. T8SHAS12.A < T6SHAS12.C
- h. T8SHAS12.A > T6SHAS12.C
- i. T8SHAS12.A = T6SHAS12.C

### Test Statistics<sup>a</sup>

|                        | T11SHAS12.B -<br>T8SHAS12.A | T6SHAS12.C -<br>T11SHAS12.B | T8SHAS12.A -<br>T6SHAS12.C |
|------------------------|-----------------------------|-----------------------------|----------------------------|
| Z                      | -2.716 <sup>b</sup>         | -2.640 <sup>c</sup>         | -.552 <sup>b</sup>         |
| Asymp. Sig. (2-tailed) | .007                        | .008                        | .581                       |

- a. Wilcoxon Signed Ranks Test
- b. Based on positive ranks.
- c. Based on negative ranks.

### NPar Tests
